# 1 **Inferring Neural Activity Before Plasticity: A Foundation** 2 **for Learning Beyond Backpropagation**

3 **Yuhang Song<sup>1,2,\*</sup>, Beren Millidge<sup>2</sup>, Tommaso Salvatori<sup>1</sup>, Thomas Lukasiewicz<sup>1,\*</sup>, Zhenghua Xu<sup>1,3</sup>, and**  
4 **Rafal Bogacz<sup>2,\*</sup>**

5 <sup>1</sup>Department of Computer Science, University of Oxford, Oxford, United Kingdom

6 <sup>2</sup>Medical Research Council Brain Networks Dynamics Unit, University of Oxford, Oxford, United Kingdom

7 <sup>3</sup>State Key Laboratory of Reliability and Intelligence of Electrical Equipment, Hebei University of Technology, Tianjin, China

8 \*Corresponding authors: yuhang.song@bndu.ox.ac.uk; thomas.lukasiewicz@cs.ox.ac.uk; rafal.bogacz@ndcn.ox.ac.uk

## 9 **Abstract**

10 For both humans and machines, the essence of learning is to pinpoint which components in its information processing pipeline are responsible for an error in its output — a challenge that is known as *credit assignment*. How the brain solves credit assignment is a key question in neuroscience, and also of significant importance for artificial intelligence. It has long been assumed that credit assignment is best solved by backpropagation, which is also the foundation of modern machine learning. However, it has been questioned whether it is possible for the brain to implement backpropagation and learning in the brain may actually be more efficient and effective than backpropagation. Here, we set out a fundamentally different principle on credit assignment, called *prospective configuration*. In prospective configuration, the network first infers the pattern of neural activity that should result from learning, and then the synaptic weights are modified to consolidate the change in neural activity. We demonstrate that this distinct mechanism, in contrast to backpropagation, (1) underlies learning in a well-established family of models of cortical circuits, (2) enables learning that is more efficient and effective in many contexts faced by biological organisms, and (3) reproduces surprising patterns of neural activity and behaviour observed in diverse human and animal learning experiments. Our findings establish a new foundation for learning beyond backpropagation, for both understanding biological learning and building artificial intelligence.

11 The credit assignment problem<sup>1</sup> lies at the very heart of learning. *Backpropagation*<sup>2–5</sup>, as a simple yet effective credit assignment theory, has powered notable advances in artificial intelligence since its inception<sup>6–11</sup>. It has also gained a predominant place in understanding learning in the brain<sup>1,12–21</sup>. Due to this success, much recent work has focused on understanding how biological neural networks could learn in a way similar to backpropagation<sup>22–31</sup>: although many proposed models do not implement backpropagation exactly, they nevertheless try to approximate backpropagation, and much emphasis is placed on how close this approximation is<sup>22–28,32–34</sup>. However, learning in the brain is superior to backpropagation in many critical aspects — for example, compared to the brain, backpropagation requires many more exposures to a stimulus to learn<sup>35</sup> and suffers from catastrophic interference of newly and previously stored information<sup>36,37</sup>. This raises the question of whether using backpropagation to understand learning in the brain should be the main focus of the field.

22 Here, we propose that the brain instead solves credit assignment with a fundamentally different principle, which we call *prospective configuration*. In prospective configuration, before synaptic weights are modified, neural activity changes across the network so that output neurons better predict the target output; only then are the synaptic weights (weights, for short) modified to consolidate this change in neural activity. By contrast, in backpropagation the order is reversed — weight modification takes the lead

27 and the change in neural activity is the result that follows.

28 We identify prospective configuration as a principle that is implicitly followed by a well-established  
29 family of neural models with solid biological groundings, namely, energy-based networks. They include  
30 Hopfield networks<sup>38</sup> and predictive coding networks<sup>39</sup>, which have been successfully used to describe  
31 information processing in the cortex<sup>40–46</sup>. To support the theory of prospective configuration, we show  
32 that it can both yield efficient learning, which humans and animals are capable of, and reproduce data  
33 from experiments on human and animal learning. Thus, on the one hand, we demonstrate that prospective  
34 configuration performs more efficient and effective learning than backpropagation in various situations  
35 faced by biological systems, such as learning with deep structures, online learning, learning with a  
36 limited amount of training examples, learning in changing environments, continual learning with multiple  
37 tasks, and reinforcement learning. On the other hand, we demonstrate that patterns of neural activity  
38 and behaviour in diverse human and animal learning experiments, including sensorimotor learning, fear  
39 conditioning and reinforcement learning, can be naturally explained by prospective configuration, but not  
40 by backpropagation.

41 Guided by the belief that backpropagation is the foundation of biological learning, previous work  
42 showed that energy-based networks can closely approximate backpropagation. However, to achieve it, the  
43 networks were set up in an unnatural way, such that the neural activity was prevented from substantially  
44 changing before weight modification, by constraining the supervision signal to be infinitely small (e.g., as  
45 in equilibrium propagation<sup>24</sup> and in previous studies employing predictive coding networks<sup>25,47</sup>) or last an  
46 infinitely short time<sup>33,48</sup>. In contrast, we reveal that the energy-based networks without these unrealistic  
47 constraints follow the distinct principle of prospective configuration rather than backpropagation, and are  
48 superior in both learning efficiency and accounting for data on biological learning.

49 Below, we first introduce prospective configuration with an intuitive example, show how it originates  
50 from energy-based networks, describe its advantages and quantify them in a rich set of biological-relevant  
51 learning tasks. Finally, we show that it naturally explains patterns of neural activity and behaviour in  
52 diverse learning experiments.

## 53 Results

### 54 Prospective configuration: an intuitive example

55 To optimally plan behaviour, it is critical for the brain to predict future stimuli — for example, to predict  
56 sensations in some modalities on the basis of other modalities<sup>49</sup>. If the observed outcome differs from the  
57 prediction, the weights in the whole network need to be updated so that prediction in the “output” neurons  
58 are corrected. Backpropagation computes how the weights should be modified to minimize the error on  
59 the output, and this weight update results in the change of neural activity when the network next makes the  
60 prediction. In contrast, we propose that the activity of neurons is first adjusted to a new configuration, so  
61 that the output neurons better predict the observed outcome (target pattern); the weights are then modified  
62 to reinforce this configuration of neural activity. We call this configuration of neural activity “prospective”,  
63 since it is the neural activity that the network *should produce* to correctly predict the observed outcome. In  
64 agreement with the proposed mechanism of prospective configuration, it has indeed been widely observed  
65 in biological neurons that presenting the outcome of a prediction triggers changes in neural activity — for  
66 example, in tasks requiring animals to predict a fruit juice delivery, the reward triggers rapid changes in  
67 activity not only in the gustatory cortex, but also in multiple cortical regions<sup>50,51</sup>.

68 To highlight the difference between backpropagation and prospective configuration, consider a simple  
69 example in Fig. 1a. Imagine a bear seeing a river. In the bear’s mind, the sight generates predictions of  
70 hearing water and smelling salmon. On that day, the bear indeed smelled the salmon but did not hear

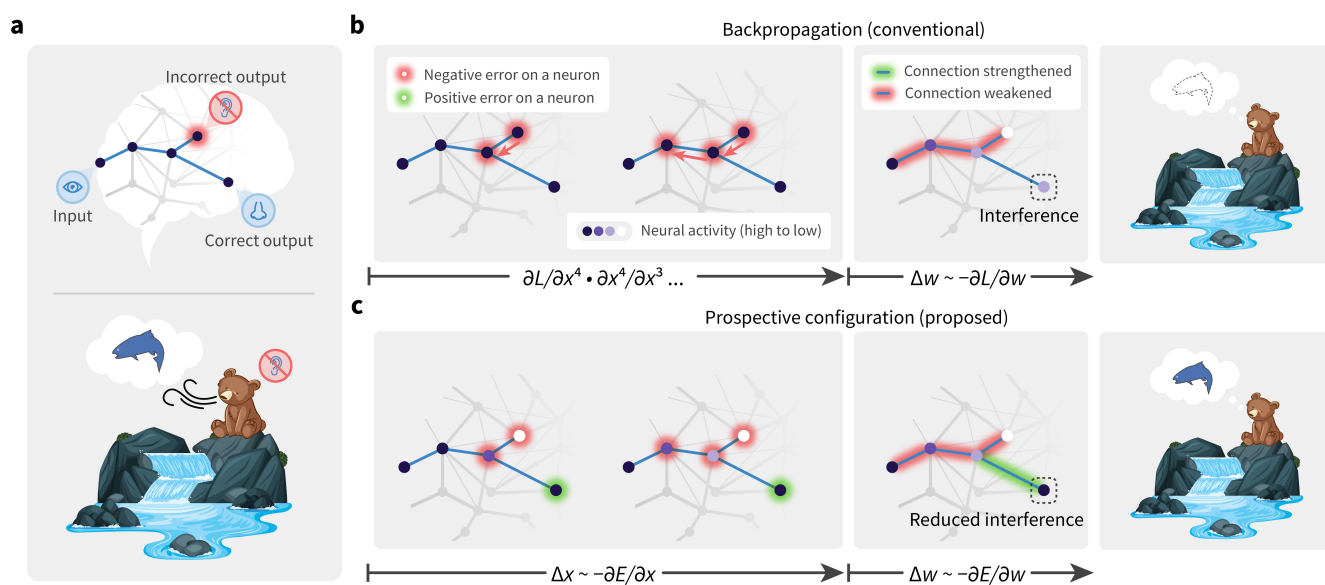

**Fig. 1 | Prospective configuration avoids interference during learning.** ▶ **a** | An abstract (top) and a concrete (bottom) example of a task inducing interference during learning. One stimulus input (seeing the water) triggers two prediction outputs (hearing the water and smelling the salmon). One output is correct (smelling the salmon), while the other one is an error (not hearing the water). Backpropagation produces interference during learning: not hearing the water reduces the expectation of smelling the salmon (panel b), although the salmon was indeed smelled. Prospective configuration, on the other hand, avoids such interference (panel c). ▶ **b** | In backpropagation, negative error propagates from the error output into hidden neurons (left). This causes a weakening of some connections, which on the next trial improves the incorrect output, but it also reduces the prediction of the correct output, thus introducing interference (middle and right). ▶ **c** | In prospective configuration, neural activity settles into a new configuration (purple of different intensity) before weight modification (left). This configuration corresponds to the activity that should be produced after learning, i.e., is “prospective”. Hence it foresees the positive error on the correct output, and modifies the connections to improve the incorrect output, while maintaining the correct output (middle and right).

71 the water, perhaps due to an ear injury, and thus the bear needs to change its expectation related to the  
 72 sound. Backpropagation (Fig. 1b) would proceed by backpropagating the negative error, so as to reduce  
 73 the weights on the path between the visual and auditory neurons. However, this also entails a reduction  
 74 of the weights between visual and olfactory neurons that would compromise the expectation of smelling  
 75 the salmon, the next time the river is visited; even though the smell of salmon was present and correctly  
 76 predicted. These undesired and unrealistic side effects of learning with backpropagation are closely related  
 77 with the phenomenon of catastrophic interference, where learning a new association destroys previously  
 78 learned memories<sup>36,37</sup>. This example shows that, with backpropagation, even learning one new aspect of  
 79 an association may interfere with the memory of other aspects of the same association.

80 In contrast, prospective configuration assumes that learning starts with the neurons being configured  
 81 to a new state — which corresponds to a pattern enabling the network to correctly predict the observed  
 82 outcome. The weights are then modified to consolidate this state. This behaviour can “foresee” side  
 83 effects of potential weight modifications and compensate for them dynamically — Fig. 1c: to correct the  
 84 negative error on the incorrect output, the hidden neurons settle to their prospective state of lower activity,  
 85 and as a result, a positive error is revealed and allocated to the correct output. Consequently, prospective  
 86 configuration increases the weights connecting to the correct output, while backpropagation does not  
 87 (cf. middle plots of Fig. 1b and c). Hence, prospective configuration is able to correct the side effects of

88 learning an association effectively, efficiently, and with little interference.

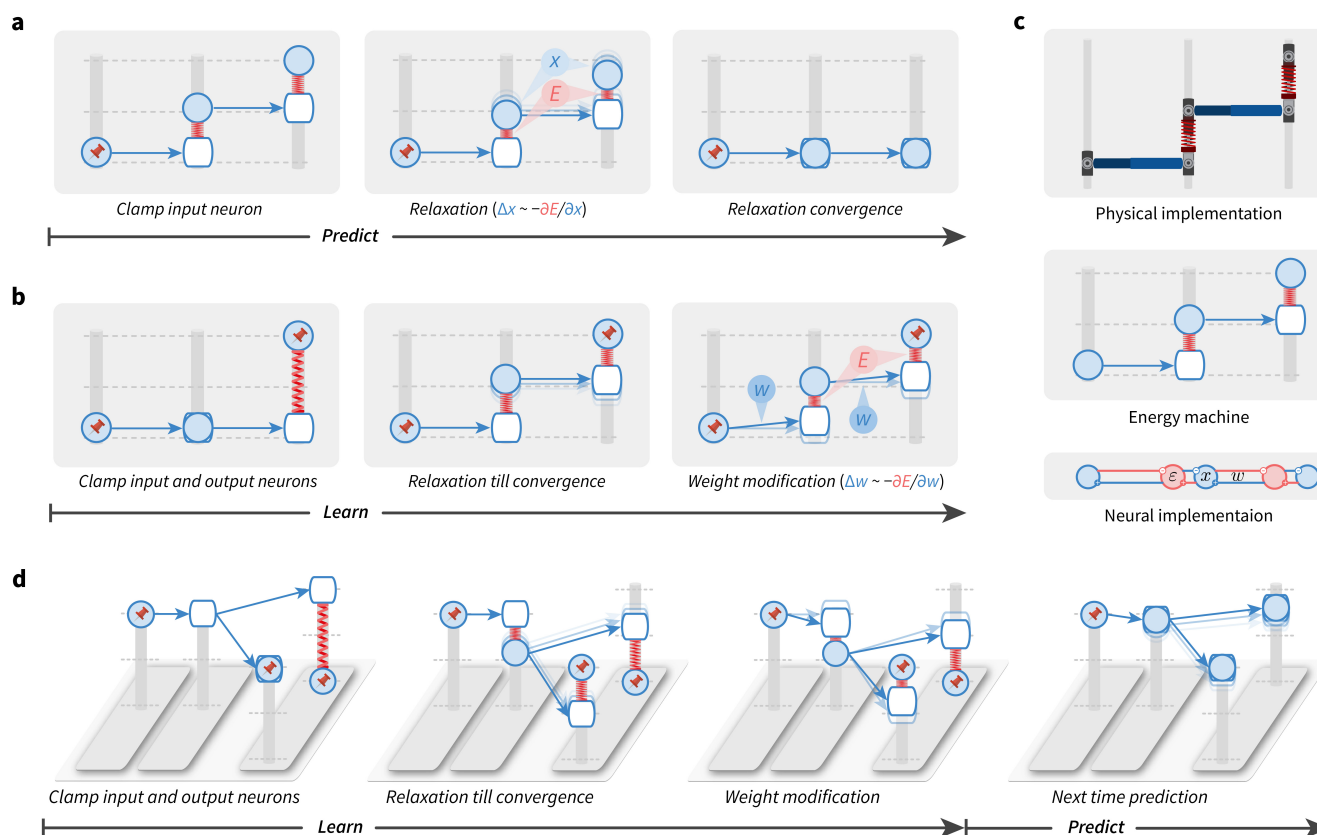

**Fig. 2 | The energy machine reveals a new understanding of energy-based networks, the mechanism of prospective configuration, and its theoretical advantages.** A subset of energy-based networks can be visualized as mechanical machines that perform equivalent computations. Here, we present one of them, predictive coding networks<sup>25,40,52</sup>. In the energy machine, the activity of a neuron corresponds to a height of a node (represented by a solid circle) sliding on a post. The input to the neuron is represented by a hollow node on the same post. A synaptic connection corresponds to a rod pointing from a solid to a hollow node. The synaptic weight determines how the input to a post-synaptic neuron depends on the activity of pre-synaptic neuron, hence it influences the angle of the rod. In energy-based networks, relaxation (i.e., neural dynamics) and weight modification (i.e., weight dynamics) are both driven by minimizing the energy, thus correspond to relaxing the energy machine by moving the nodes and tuning the rods, respectively. ► **a-b** | Predictions (a) and learning (b) in energy-based networks, visualized by the energy machine. The pin indicates that the neural activity is fixed to the input or target pattern. Here, it is revealed that the relaxation infers the prospective neural activity, towards which the weights are then modified, a mechanism that we call prospective configuration. ► **c** | The physical implementation (top) and the connectivity of a predictive coding network<sup>25,40,52</sup> (bottom), which has a dynamics mathematically equivalent to the energy machine in the middle (see Methods for details). ► **d** | The learning problem in Fig. 1, visualized by the energy machine, which learns to improve the incorrect output while not interfering with the correct output, thanks to the mechanism of prospective configuration.

89 **Origin of prospective configuration: energy-based networks**

90 To show how prospective configuration naturally arises in energy-based networks, we introduce a physical  
 91 machine analog, that provides an intuitive understanding of energy-based networks, and how they produce  
 92 the mechanism of prospective configuration.

93 Energy-based networks have been widely and successfully used in describing biological neural  
94 systems<sup>38,39,53–55</sup>. In these models, a neural circuit is described by a dynamical system driven by reducing  
95 an abstract “energy”, e.g., reflecting errors made by the neurons; see Methods. Neural activity and synaptic  
96 weights change to reduce this energy, hence they can be considered as “movable parts” of the dynamical  
97 system. We show below that energy-based networks are mathematically equivalent to a physical machine  
98 (we call it *energy machine*), where the energy function has an intuitive interpretation and its dynamics are  
99 straightforward — the energy machine simply adjusts its movable parts to reduce energy.

100 As shown in Fig. 2a–b, the energy machine includes nodes sliding on vertical posts, connected with  
101 each other via rods and springs. Translating from energy-based networks to the energy machine, the neural  
102 activity maps to the vertical position of a solid node, a connection maps to a rod (blue arrow) pointing  
103 from one node to another (where the weight determines how the end position of the rod relates to the initial  
104 position), and the energy function maps to the elastic potential energy of springs with nodes attached  
105 on their both ends (the natural length of the springs is zero). Different energy functions and networks  
106 structures result in different energy-based networks, corresponding to energy machines with different  
107 configurations and combinations of nodes, rods, and springs. In Fig. 2, we present the energy machine of  
108 predictive coding networks<sup>25,40,52</sup>, because they are most accessible and established to be closely related  
109 to backpropagation<sup>25,33</sup>.

110 The dynamics of energy-based networks, which are driven by minimizing the energy function, maps to  
111 the relaxation of the energy machine, which is driven by reducing the total elastic potential energy on the  
112 springs. A prediction with energy-based networks involves clamping the input neurons to the provided  
113 stimulus and updating the activity of the other neurons, which corresponds to fixing one side of the energy  
114 machine and letting the energy machine relax by moving nodes (Fig. 2a). Learning with energy-based  
115 networks involves clamping the input and output neurons to the corresponding stimulus, first letting the  
116 activity of the remaining neurons converge and then updating weights, which corresponds to fixing both  
117 sides of the energy machine and letting the energy machine relax first by moving nodes and then by tuning  
118 rods (Fig. 2b).

119 The energy machine reveals the essence of energy-based networks: the relaxation before weight  
120 modification lets the network settle to a new configuration of neural activity, corresponding to those that  
121 would have occurred after the error was corrected by the modification of weights, i.e., prospective activity  
122 (thus, we call this mechanism prospective configuration). For example, the second layer “neuron” in  
123 Fig. 2b increases its activity, and this increase in activity would also be caused by the subsequent weight  
124 modification (of the connection between the first and the second neurons). In simple terms, the relaxation  
125 in energy-based networks infers the prospective neural activity after learning, towards which the weights  
126 are then modified. This distinguishes it from backpropagation, where the weights modification takes the  
127 lead, and the change in neural activity is the result that follows.

128 The bottom part of Fig. 2c shows the connectivity of a predictive coding network<sup>25,40,52</sup>, which has a  
129 dynamics mathematically equivalent to the energy machine shown above it. Predictive coding networks  
130 include neurons (blue) corresponding to nodes on the posts, and separate neurons encoding prediction  
131 errors (red) corresponding to springs. For details, see Methods and Extended Data Fig. 1, where we list  
132 equations describing predictive coding networks, show how they map on the neural implementation and  
133 the proposed energy machine.

134 Using the energy machine, Fig. 2d simulates the learning problem from Fig. 1. Here, we can see that  
135 prospective configuration indeed foresees the result of learning and its side effects, through relaxation.  
136 Hence, it learns to avoid interference within one iteration, which would otherwise take multiple iterations  
137 for backpropagation.

138 **Advantages of prospective configuration: reduced interference and faster learning**

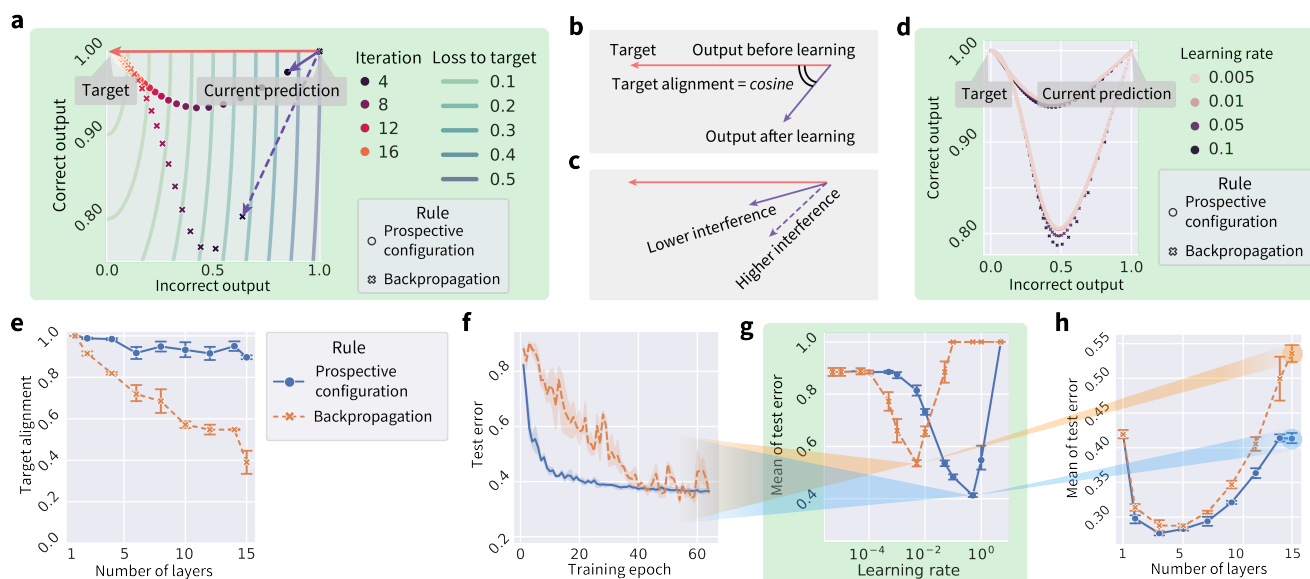

**Fig. 3 | Learning with prospective configuration changes the activity of output neurons in a direction more aligned towards the target.** ▶ **a** | Simulation of network from Fig. 1 showing changes of the correct and incorrect output neurons during training (“Iteration”), trained with both learning rules. Here, learning with prospective configuration (purple solid vector) aligns better with the target (red vector), than for backpropagation (purple dashed vector). ▶ **b** | The interference can be quantified by “target alignment”: the cosine similarity of the direction of target (red vector) and the direction of learning (purple vector). ▶ **c** | Higher target alignment indicates less interference and vice versa. ▶ **d** | The same experiment as in panel a repeated with a learning rate ranging from 0.005 to 0.5 represented by the size of the markers, where it is shown that the choice of learning rate slightly changes the trajectories for both methods but the conclusion holds irrespective of the learning rate. ▶ **e** | Target alignment of randomly generated networks trained with both learning rules, as a function of depth of the network. Here, target alignment drops as the network gets deeper, demonstrating the difficulty of training deep structures. However, prospective configuration maintains much higher target alignment along the way. ▶ **f** | Classification error during training on FashionMNIST<sup>56</sup> dataset containing images of clothing belonging to different categories, for both learning rules, with a deep neural network of 15 layers. ▶ **g** | Mean of the classification error over training epochs (reflecting how fast test error drops), as a function of learning rate. Results in the panels f and h are for the learning rates giving the minima of the corresponding curves in this panel. ▶ **h** | Mean of classification error of other network depths. Each point is from learning rate independently optimized for each learning rule in the corresponding setup of network depth. In panels e–h, prospective configuration demonstrates notable advantage as the structure gets deep.

139 Here we quantify interference in the above scenario and demonstrate how the reduced interference  
 140 translates into an advantage in performance. In all simulations in the main text prospective configuration  
 141 is implemented in predictive coding networks (see Methods, other energy-based models are considered in  
 142 Extended Data Figures and Supplementary Information). Fig. 3a compares the activity of output neurons  
 143 in the example in Fig. 1, between backpropagation and prospective configuration. Initially both output  
 144 neurons are active (top right corner), and the output should change towards a target in which one of the  
 145 neurons is inactive (red vector). Learning with prospective configuration results in changes on the output  
 146 (purple solid vector) that are aligned better with the target than those for backpropagation (purple dotted  
 147 vector). Following the first update of weights, we simulate multiple iterations until the network is able to

148 correctly predict the target. Here, “iteration” refers to each time the agent is presented with stimuli and  
149 conducts one weight update because of the stimulus (a trial-by-trial iteration). Within each iteration, it  
150 contains: (1) numerical integration procedure of relaxation of energy-based networks, which captures its  
151 continuous process; (2) one update of weights at the end of the above procedure. Although the output from  
152 backpropagation can reach the target after multiple iterations, the output for the “correct neuron” diverges  
153 from the target during learning and then comes back - it is particularly undesired effect in biological  
154 learning, where networks can be “tested” at any point during the learning process, because it may lead  
155 to incorrect decisions affecting chances for survival. By contrast, prospective configuration substantially  
156 reduces this effect.

157 Although backpropagation modifies the weights to directly reduce the cost in the space of weights  
158 (i.e., performs gradient descent), surprisingly and rather subversively, it does not push the resulting  
159 output activity directly towards the target. To illustrate this, Fig. 3a visualizes the cost with contour lines.  
160 Changing the activity of output neurons according to the gradient of the cost would correspond to a change  
161 orthogonal to the contour lines, i.e., that indicated by the red arrow. However, backpropagation changes the  
162 output in a different direction shown by a dashed arrow. Since the network is a complex cascaded system,  
163 optimizing the weights independently, without considering the effect of update of other weights, leads to  
164 the output activity not updating towards the target directly, due to different weight updates to different  
165 layers interfering with each other. By contrast, when updating each weight, prospective configuration  
166 considers the results of update of other weights by finding a desired configuration of neural activity first,  
167 and such mechanism is missing in backpropagation but natural in energy-based networks. Extended Data  
168 Fig. 2 shows a direct comparison of how these two models evolve in weight and output spaces during  
169 learning.

170 The interference can be quantified by the angle between the direction of target (from current output to  
171 target) and learning (from current output to output after learning, both measured without target provided),  
172 and we define “target alignment” as the cosine of this angle (Fig. 3b), hence high interference corresponds  
173 to low target alignment (Fig. 3c). It is useful to highlight that the target alignment is little affected by the  
174 learning rate, as shown by Fig. 3d, demonstrating that the learning rate has little effect on the direction  
175 and trajectory output neurons take. The difference in target alignment demonstrated in Fig. 3a is also  
176 present for deeper and larger (randomly generated) networks, as shown in Fig. 3e. When a network has no  
177 hidden layers, the target alignment is equal to 1 (proved in section 2.4.1 of Supplementary Information).  
178 The target alignment drops for backpropagation as the network gets deep, because changes in weights in  
179 one layer interfere with changes in other layers (as explained in Fig. 1) and the backpropagated errors  
180 do not lead to appropriate modification of weights in hidden layers (Extended Data Fig. 2). By contrast,  
181 prospective configuration maintains a much higher value along the way. This higher target alignment  
182 of prospective configuration can be theoretically explained by the following: (i) there exists a close link  
183 between prospective configuration and an algorithm called target propagation<sup>57</sup> (shown in Extended Data  
184 Fig. 3 and section 2.2 of Supplementary Information); and (ii) under certain conditions target propagation<sup>57</sup>  
185 has target alignment of 1<sup>58</sup> (demonstrated in Extended Data Fig. 4 and Section 2.4.2 of Supplementary  
186 Information). Thus, the link with target propagation<sup>57</sup> provides a theoretical insight (with numerical  
187 verification) on why prospective configuration has a higher target alignment.

188 The effectiveness of target alignment directly translates to the efficiency of learning: Fig. 3f shows  
189 that the test error during training in a visual classification task with a deep neural network of 15 layers  
190 decreases faster for prospective configuration than backpropagation. (“test error” refers to the ratio of  
191 incorrectly classified samples in all samples on the test set).

192 Throughout the whole paper, if learning rate is not presented in a plot, the plot corresponds to the best  
193 learning rate optimized independently for each rule under the setup, via a grid search. The optimization

194 target is either the learning performance or approximation to experimental recordings, depending on  
195 the nature of the experiment (details can be found in method section for each experiment). Thus for  
196 example, Fig. 3f shows the test errors as training progress, and they are with the learning rates optimized  
197 independently for each learning rule. The optimization target is the “mean of test error” during training  
198 (reflecting how fast the test error decreases during training). Fig. 3g plots this “mean of test error” for  
199 different learning rates for both learning rules, and the learning rates giving the minima of the curves have  
200 been used in Fig. 3f.

201 Fig. 3h repeats the experiment on networks of other depths, and shows the mean of the test error  
202 during training (reflecting how fast the test error drops), as a function of network depth. The mean error  
203 is higher for low depths, as these networks are unable to learn the task, and for greater depths, because  
204 it takes longer to train deeper networks. Importantly, the gap between backpropagation and prospective  
205 configuration widens for deeper networks, paralleling the difference in target alignment. Efficient training  
206 with deeper networks is important for biological neural systems, known to be deep, e.g., primate visual  
207 cortex<sup>59</sup>.

208 In the Supplementary Information we develop a formal theory of prospective configuration and provide  
209 further illustrations and analyses of its advantages. Extended Data Figs. 5 formally defines prospective  
210 configuration and demonstrates that it is indeed commonly observed in different energy-based networks.  
211 Extended Data Figs. 6 and 7 empirically verify and generalize the advantages expected from the theory:  
212 they show that prospective configuration yields more accurate error allocation and less erratic weight  
213 modification, respectively.

#### 214 **Advantages of prospective configuration: effective learning in biologically relevant scenarios**

215 Inspired by these advantages, we show empirically that prospective configuration indeed handles various  
216 learning problems that biological systems would face better than backpropagation. Since the field of  
217 machine learning has developed effective benchmarks for testing learning performance, we use variants  
218 of classic machine learning problems that share key features with the learning in natural environments.  
219 Such problems include online learning where the weights must be updated after each experience (rather  
220 than a batch of training examples)<sup>60</sup>, continual learning with multiple tasks<sup>61,62</sup>, learning in changing  
221 environments<sup>63</sup>, learning with limited amount of training examples, and reinforcement learning<sup>10</sup>. In all  
222 the aforementioned learning problems, prospective configuration demonstrates a notable superiority over  
223 backpropagation.

224 Firstly, based on the example in Fig. 1, we expect prospective configuration to require fewer episodes  
225 for learning than backpropagation. Before presenting the comparison, we describe how backpropagation  
226 is used to train artificial neural networks. Typically, the weights are only modified after a batch of training  
227 examples, based on the average of updates derived from individual examples (Fig. 4a). In fact, back-  
228 propagation relies heavily on averaging over multiple experiences to reach human-level performance<sup>66–68</sup>  
229 as it needs to stabilise training<sup>69</sup>. By contrast, biological systems must update the weights after each  
230 experience, and we compare the learning performance in such a setting. The sampling efficiency can be  
231 quantified by mean of test error during training, which is shown in Fig. 4b as a function of batch size  
232 (number of experiences that the updates are averaged over). The efficiency strongly depends on batch  
233 size for backpropagation, because it requires batch-training to average out erratic weight updates, while  
234 this dependence is weaker for prospective configuration, where the weight changes are intrinsically less  
235 erratic and the batch-averaging is less required (see Extended Data Figs. 7). Importantly, prospective  
236 configuration learns faster with smaller batch sizes, as in biological settings. Additionally, the final  
237 performance can be quantified by the minimum of the test error, which is shown in Fig. 4c, when trained  
238 with batch size equal to one. Here, prospective configuration also demonstrates a notable advantage over



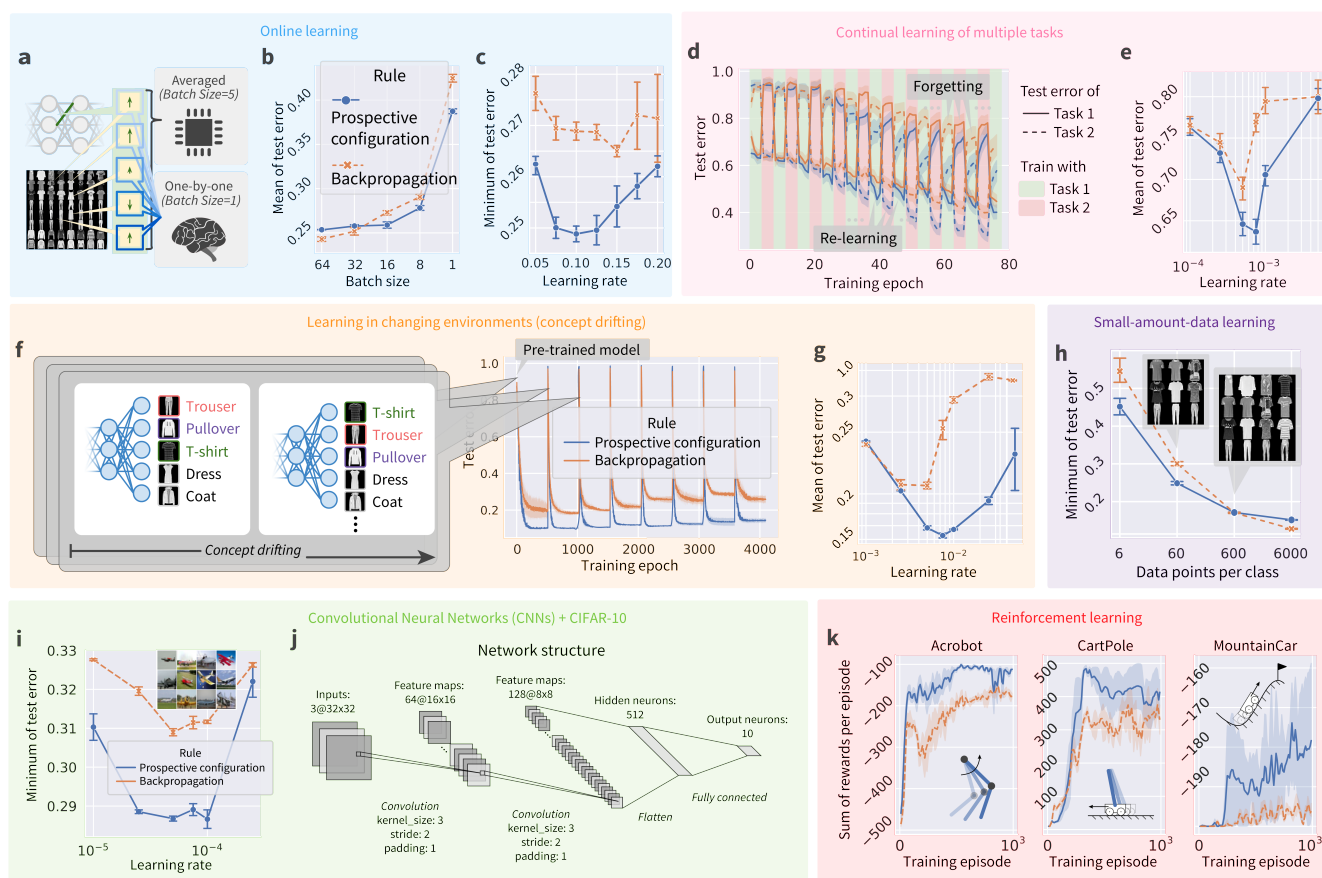

**Fig. 4 | Prospective configuration achieves a superior performance over backpropagation in various learning situations faced by biological systems.** These situations are: online learning<sup>60</sup> (a–c), continual learning of multiple tasks<sup>61,62</sup> (d–e), learning in changing environments<sup>63</sup> (f–g), learning with a limited amount of training examples (h), and reinforcement learning<sup>10</sup> (k). Panels corresponding to each situation are grouped together with the same background colour. Simulations of each situation differ from the “default setup” described in the Methods in a single aspect unique to this task. For example, the default setup involves training with mini-batches, so the batch size was only set to 1 in (a–c) for investigating online learning, while it was set to a larger default value in rest of the groups (panels). In supervised learning setups, fully-connected networks (a–h) are evaluated on FashionMNIST<sup>56</sup> dataset and convolutional neural networks<sup>64</sup> (i–j) are evaluated on CIFAR-10<sup>65</sup> dataset. In reinforcement learning setup (k), fully-connected networks are evaluated on three classic control problems. If the learning rate is not presented in a plot, each point (a setup of experiment) in the plot corresponds to the best learning rate optimized independently for the each rule under that setup. ▶ **a** | Difference in training setup between computers that can average weight modifications for individual examples to get a “statistically good” value, and biological systems which must apply one modification before computing another. ▶ **b** | Mean of the test errors during training, as a function of batch size. ▶ **c** | Minimum of the test error during training as a function of learning rate. ▶ **d** | Test error during continual learning of two tasks. ▶ **e** | Mean of test error of both tasks during training as a function of learning rate. ▶ **f** | Test error during training when learning with concept drifting. ▶ **g** | Mean of test error during training with concept drifting as a function of learning rate. ▶ **h** | Minimum of the test errors during training, with different amounts of training examples (datapoints per class). ▶ **i** | Minimal of test error during training of a convolutional neural network trained with with prospective configuration and backpropagation on CIFAR-10<sup>65</sup> dataset. ▶ **j** | The structure detail of the convolutional neural network used in the last panel. ▶ **k** | Sum of rewards per episode during training on three classic reinforcement learning tasks (insets). An episode is a period from initialization of environment to reaching a terminate state.

239 backpropagation.

240 Secondly, biological organisms need to sequentially learn multiple tasks, while artificial neural  
241 networks show catastrophic forgetting: when trained on a new task, performance on previously learnt  
242 tasks is largely destroyed<sup>36,70–72</sup>. Fig. 4d shows the performance when trained on two tasks alternately  
243 (task 1 is classifying five randomly selected classes in FashionMNIST dataset, and task 2 is classifying  
244 the remaining five classes). It shows that prospective configuration outperforms backpropagation in both  
245 terms of avoiding forgetting previous tasks and re-learning current tasks. Fig. 4e summarizes the results.

246 Thirdly, biological systems often need to rapidly adapt to changing environments. A common way  
247 to simulate this is “concept drifting”<sup>63</sup>, where a part of the mapping between the output neurons to the  
248 semantic meaning is shuffled every period of time (Fig. 4f left). Fig. 4f right shows the test error during  
249 training with concept drifting. Before epoch 0, both learning rules are initialized with the same pre-trained  
250 model (trained with backpropagation), thus, the epoch 0 is the first time the model experiences concept  
251 drift. Fig. 4g summarizes the results, and shows that for this task there is a particularly large difference in  
252 mean error (for optimal learning rates). This large advantage of prospective configuration is related to  
253 it being able to optimally detect which weights to modify (see Extended Data Figs. 6), and to preserve  
254 existing knowledge while adapting to changes (Fig. 1). This ability to maintain important information  
255 while updating other is critical for survival of animals in natural environments that are bound to change,  
256 and prospective configuration has a very substantial advantage in this respect.

257 Furthermore, biological learning is also characterized by a limited data availability. Fig. 4h show that  
258 prospective configuration outperforms backpropagation when the model is trained with fewer examples.

259 To demonstrate the advantage of prospective configuration also scales up to larger networks and  
260 problems, we evaluate convolutional neural networks<sup>64</sup> on CIFAR-10<sup>65</sup> trained with both learning rules  
261 (Fig. 4i), where prospective configuration shows notable advantages over backpropagation. The detailed  
262 structure of the convolutional networks are given in Fig. 4j.

263 Another key challenge for biological systems is to decide which actions to take. Reinforcement  
264 learning theories (e.g.,  $Q$ -learning) propose that it is solved by learning the expected reward resulting from  
265 different actions in different situations<sup>73</sup>. Such prediction of rewards can be made by neural networks<sup>10</sup>,  
266 which can be trained with prospective configuration or backpropagation. The sum of rewards per episode  
267 during training on three classic reinforcement learning tasks is reported in Fig. 4k, where prospective  
268 configuration demonstrates a notable advance over backpropagation. This large advantage may arise  
269 because reinforcement learning is particularly sensitive to erratic changes in network’s weights (as the  
270 target output depends on reward predicted by the network itself for a new state - see Methods).

271 Based on the superior learning performance of prospective configuration, we may expect that this  
272 learning mechanism has been favored by evolution, thus in the next sections we investigate if it can account  
273 for neural activity and behaviour during learning better than backpropagation.

## 274 **Evidence for prospective configuration: inferring of latent state during learning**

275 Prospective configuration is related to theories proposing that before learning, the brain first infers a  
276 latent state of environment from feedback<sup>74–76</sup>. Here, we propose that this inference can be achieved in  
277 neural circuits through prospective configuration, where following feedback, neurons in “hidden layers”  
278 converge to a prospective pattern of activity that encodes this latent state. We demonstrate that data from  
279 various previous studies, which involved the inference of a latent state, can be explained by prospective  
280 configuration. These data were previously explained by complex and abstract mechanisms, such as  
281 Bayesian models<sup>74,75</sup>, while here we mechanistically show with prospective configuration how such  
282 inference can be performed by minimal networks encoding only the essential elements of the tasks.

283 The dynamical inference of latent state from feedback has been recently proposed to take place during

284 sensorimotor learning<sup>75</sup>. In this experiment, participants received different motor perturbations in different  
 285 contexts, and learned to compensate for these perturbations. Behavioural data suggest that after receiving  
 286 the feedback, the participants were first employing it to infer the context, and then adapted the force for  
 287 the inferred context. We demonstrate that prospective configuration is able to reproduce these behavioural  
 288 data, while backpropagation cannot.

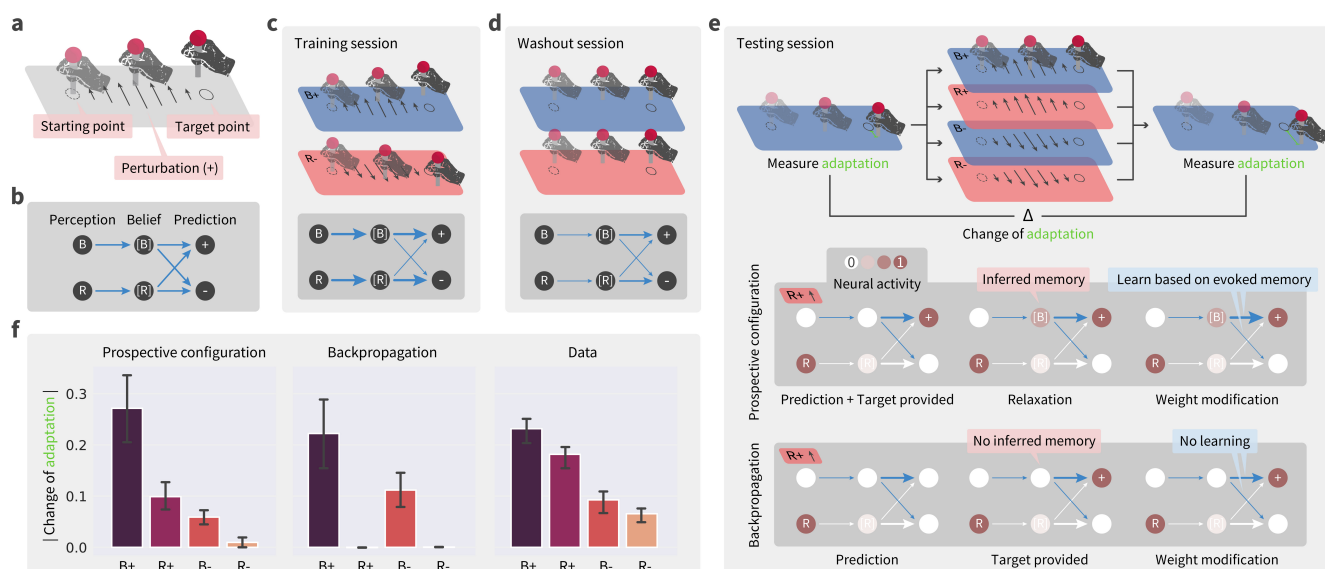

**Fig. 5 | Prospective configuration explains contextual inference in human sensorimotor learning.** ▶ **a** | The structure of an experimental trial, where participants were asked to move a stick from the starting point to the target point while experiencing perturbations. ▶ **b** | The minimal network for this task, including six connections encoding the associations from the backgrounds (B and R) to the belief of contexts ([B] and [R]), as well as from belief of contexts to prediction of perturbations (+ and -). ▶ **c-e** | A sequence of sessions the participants experienced: training, washout, and testing. Inside each panel, the darker box demonstrates the expected network after the session, where thickness represents the strength of connections. In the testing session, the darker box explains how the two learning rules learn differently on the R+ trial, leading to the differences in panel f. ▶ **f** | Predictions of the two learning rules compared against behavioural data measured from human participants, where prospective configuration reproduces the key patterns of data but backpropagation cannot.

289 Specifically, in the task (Fig. 5a), participants were asked to move a stick from a starting point to a  
 290 target point, while experiencing perturbations. The participants experienced a sequence of blocks of  
 291 trials (Fig. 5c-e) including training, washout, and testing. During the training session, different directions  
 292 of perturbations, positive (+) or negative (-), were applied in different contexts, blue (B) or red (R)  
 293 backgrounds, respectively. We denote these trials as B+ and R-. These trials may be associated with latent  
 294 states, which we denote by [B] and [R]; e.g., the latent state [B] may be associated with both background  
 295 B and perturbation +. The next stage of the task was designed to investigate if this latent state [B] can be  
 296 activated by the perturbation + even if no background B is shown. Thus, participants experienced different  
 297 trials including R+ (i.e., perturbation + but no background B). Specifically, following a washout session  
 298 (during which no perturbation was provided), in the testing session the participants experienced one of  
 299 the four possible test trials: B+, R+, B-, and R-. To evaluate learning on the test trials, motor adaptation  
 300 (i.e., the difference between the final and target stick positions) was measured before and after the test  
 301 trial, on two trials with blue background (Fig. 5e). The change of the adaptation between these two trials  
 302 is a reflection of learning about blue context that occurred at the test trial. If participants just associated

303 feedback with the colour of background (B), then the change of adaptation would only occur with test  
 304 trials B+ and B-. However, experimental data (Fig. 5f, right) show that there was substantial adaptation  
 305 change also with R+ trials (which was even bigger than with B- trials).

306 To model learning in this task, we consider a neural network (Fig. 5b) where input nodes encode the  
 307 colour of background, and outputs encode movement compensations in the two directions. Importantly,  
 308 this network also includes hidden neurons encoding belief of being in the contexts associated with the  
 309 two backgrounds ([B] and [R]). Trained with the exact procedure of the experiment<sup>75</sup> from randomly  
 310 initialized weights, prospective configuration with this minimal network can reproduce the behavioural  
 311 data, while backpropagation cannot (cf., Fig. 5f left and middle).

312 Prospective configuration can produce change in adaptation with R+ test trial, because after + feedback,  
 313 it is able to also activate context [B] that was associated with this feedback during training, and then  
 314 learn compensation for this latent state. To shed light on how this inference takes place in the model, the  
 315 bottom parts of Fig. 5c-d show evolution of the weights of the network over sessions (thickness represents  
 316 the strength of connections). Fig. 5e bottom, shows the difference between the two learning rules at the  
 317 exposure to R+: although B is not perceived, prospective configuration infers a moderate excitation of  
 318 the belief of blue context [B], because the positive connection from [B] to + was built during the training  
 319 session. The activity of [B] enables the learning of weights from [B] to + and -; while backpropagation  
 320 does not modify any weights originating from [B].

321 For simplicity of explanation, we simulated the above experiment with minimal networks necessary to  
 322 perform the task, but networks in the brain include multiple neurons, and it is important to establish if  
 323 task structure that was reflected in these minimal networks can be discovered and learned by the networks  
 324 themselves. Indeed, Extended Data Fig. 8 shows that networks with general fully-connected structure  
 325 and more hidden neurons can replicate the above data on motor learning when employing prospective  
 326 configuration, but not when using backpropagation. Thus, prospective configuration can discover task  
 327 structure automatically and learn the task, while backpropagation cannot.

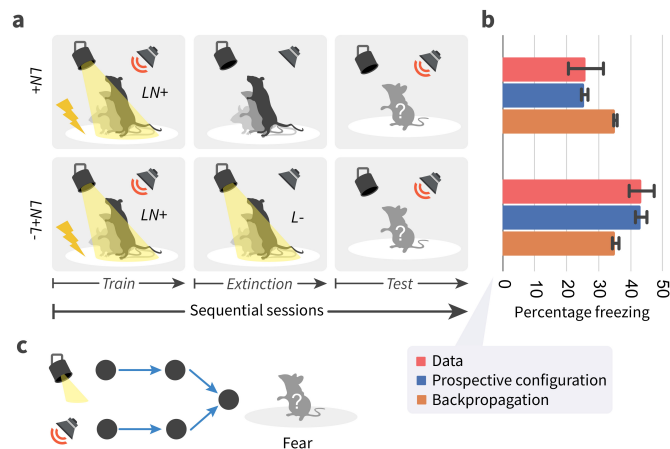

**Fig. 6 | Prospective configuration infers latent state during fear conditioning.** ▶ a | The fear conditioning task, where rats are first trained to associate fear (electric shock) with noise and light; then in one of the groups, fear related to light is eliminated in extinction session; finally, the predicted fear (percentage of rats freezing) of noise is measures in test session. ▶ b | The predicted fear from networks trained with prospective configuration and backpropagation, compared against the fear (percentage freezing) measured in rats. Prospective configuration reproduces the key finding that eliminating the fear to light changes the fear to noise. ▶ c | The architecture of simulated networks.

328 Studies of animal conditioning have also observed that feedback in learning tasks involving multiple

329 stimuli may trigger learning about non-presented stimuli<sup>77–81</sup>. For example, in one study<sup>77</sup> rats were  
330 trained to associate fear (electric shock) with noise and light; and then, in one group, fear related to  
331 light was eliminated in an extinction session (Fig. 6a). Remarkably, the data suggested that eliminating  
332 the fear to light increased the fear to noise (Fig. 6b). Such learning is not predicted by the standard  
333 Rescorla-Wagner model<sup>82</sup>. We consider a neural network (Fig. 6c) that includes two input neurons  
334 encoding the two stimuli, two hidden neurons, and one output neuron encoding the fear. Trained with  
335 the exact procedure of animal experiment<sup>77</sup> from randomly initialized weights, prospective configuration  
336 with this simple network can reproduce the data, while backpropagation cannot (cf., Fig. 6b blue and  
337 orange). In the network employing prospective configuration, the feedback changes the activity of a  
338 hidden neuron previously associated with this feedback and with non-presented stimulus (noise), and  
339 hence enables modification of connections of this neuron (a learning mechanism analogous to that in  
340 sensorimotor learning Fig. 5, see Extended Data Figs. 9 for details).

### 341 **Evidence for prospective configuration: discovering task structure during learning**

342 Prospective configuration is also able to discover the underlying task structure in reinforcement learning.  
343 Particularly, we consider a task where reward probabilities of different options were not independent<sup>74</sup>.  
344 In this study humans were choosing between two options, whose reward probabilities were constrained  
345 such that one option had higher reward probability than the other (Fig. 7a). Occasionally the reward  
346 probabilities were swapped, so if one probability was increased, the other was decreased by the same  
347 amount. Remarkably, the recorded fMRI data suggested that participants learned that the values of two  
348 options were negatively correlated, and on each trial updated the value estimates of both options in opposite  
349 ways. This conclusion was drawn from the analysis of the signal from medial prefrontal cortex which  
350 encoded the expected value of reward. Fig. 7c, right compares this signal after making a choice on two  
351 consecutive trials: a trial on which reward was not received (“Punish trial”) and the next trial. If the  
352 participant selected the same option on both trials (“Stay”), the signal decreased, indicating the reward  
353 expected by the participant was reduced. Remarkably, if the participant selected the other option on the  
354 next trial (“Switch”), the signal increased, suggesting that negative feedback for one option increased the  
355 value estimate for the other. Such learning is not predicted by standard reinforcement learning models<sup>74</sup>.

356 This task can be conceptualized as having a latent state encoding which option is superior, and this  
357 latent state determines the reward probabilities for both options. Consequently, we consider a neural  
358 network reflecting this structure (Fig. 7b) that includes an input neuron encoding being in this task (equal  
359 to 1 in simulations), a hidden neuron encoding the latent state, and two output neurons encoding the reward  
360 probabilities for the two options. Trained with the exact procedure of the experiment<sup>74</sup> from randomly  
361 initialized weights, prospective configuration with this minimal network can reproduce the data, while  
362 backpropagation cannot (cf., Fig. 7c left and middle).

363 To shed light on the difference between the models, we simulate an “idealized” version of the task  
364 in Fig. 7d-e: the network shown in the inset starts from ( $\{W_0 = 1, W_1 = 1, W_2 = -1\}$ ) and is trained for  
365 64 trials in total. The rewards and punishments are delivered deterministically, and the reversal only  
366 occurs once at the beginning of training. Fig. 7d inspects prospective configuration at the first few training  
367 iterations: during relaxation, the hidden neuron is able to infer its prospective configuration, i.e., negative  
368 hidden activity encoding that the rewarded choice has reversed. In Fig. 7e, such inference by prospective  
369 configuration results in an increase of  $W_1$ : since it has inferred from the punishment that the rewarded  
370 choice has reversed to a non-rewarded one, such punishment strengthens the connection from the latent  
371 state representing non-rewarded choice to a punishment. By contrast, in backpropagation  $W_1$  is decreased:  
372 since it receives a punishment without updating the latent state (still encoding that the rewarded choice has  
373 not changed), it weakens the connection from the latent state to a reward. Fig. 7f shows the  $W_1$  and  $W_2$

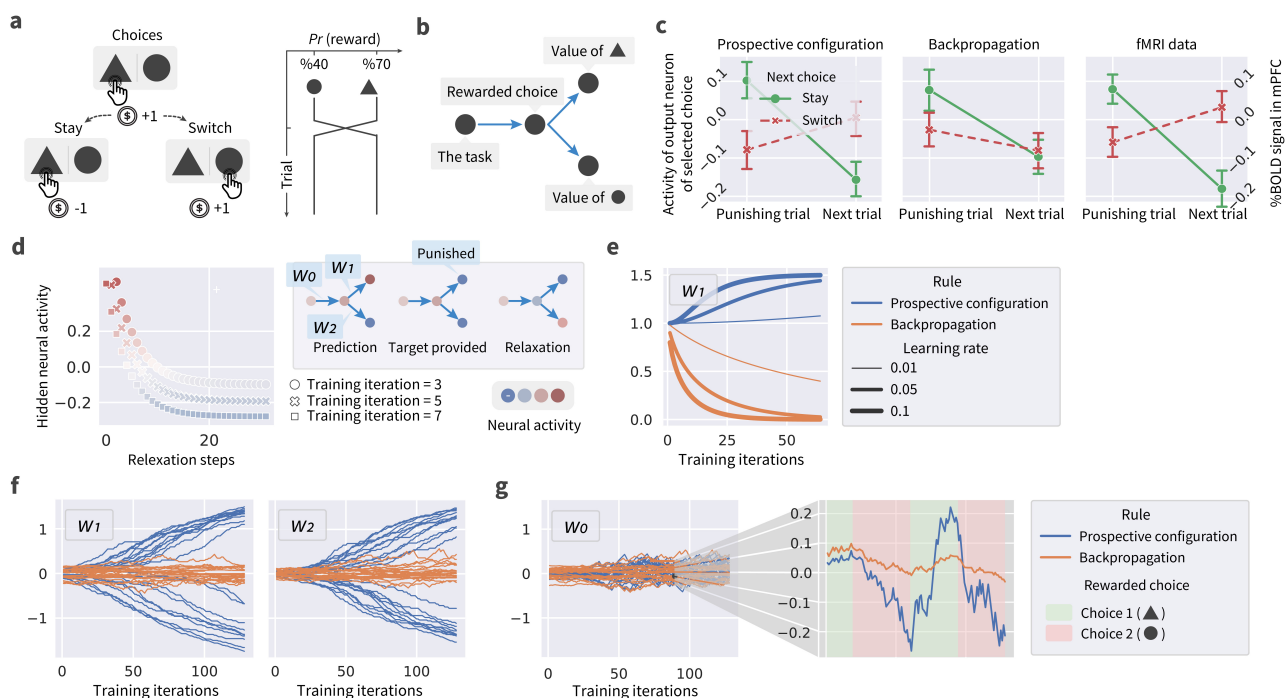

**Fig. 7 | Prospective configuration can discover the underlying task structure during reinforcement learning.**

► **a** | The reinforcement learning task, where human participants need to choose between two options, leading to either reward (gaining coins) or punishment (losing coins) with different probabilities. The probability of reward is occasionally reversed between the two options. ► **b** | The minimal network encoding the essential elements of the task. ► **c** | The activity of output neuron corresponding to the selected option, from networks trained with prospective configuration and backpropagation, compared against the fMRI data measured in human participants, i.e., peak blood oxygenation level-dependent (%BOLD) signal in the medial prefrontal cortex (mPFC). Prospective configuration reproduces the key finding that the expected value (encoded in %BOLD signal in mPFC) increases if the next choice after a punishing trial is to switch to the other option. ► **d** | Prospective configuration at the first few training iterations in an “idealized” version of the task: during relaxation, the hidden neuron is able to infer its prospective configuration, i.e., negative hidden activity encoding that the rewarded choice has reversed. ► **e** | Such inference by prospective configuration results in an increase of  $W_1$ . By contrast, in backpropagation  $W_1$  is decreased. Similar behavior also applies to  $W_2$ . ► **f** | The  $W_1$  and  $W_2$  in the simulation of the full task with stochastic rewards. Different lines correspond to different simulations. ► **g** | The evolution of  $W_0$  in the full task. In prospective configuration, this weight remains closer to 0 than  $W_1$  and  $W_2$ . Inset shows  $W_0$  on one of the simulation in the main plot, where it is demonstrated that prospective configuration easily flips  $W_0$  as the rewarded choice changes, while backpropagation has difficulty in accomplishing this.

374 in the simulation of the full task with stochastic rewards. The weights follow a similar pattern as in the  
 375 simplified task, i.e., their magnitude increases in prospective configuration. This signifies that the network  
 376 learns that the rewards from the two options are jointly determined by a hidden state. This increase of the  
 377 magnitude of  $W_1$  and  $W_2$  enables the network to infer the hidden state from the feedback, and learn the  
 378 task structure (as described for panel b). Fig. 7g shows the evolution of  $W_0$  in the full task. In prospective  
 379 configuration, this weight remains closer to 0 than  $W_1$  and  $W_2$ . Inset shows  $W_0$  on one of the simulation  
 380 in the main plot, where it is demonstrated that prospective configuration easily flips  $W_0$  as the rewarded  
 381 choice changes, while backpropagation has difficulty in accomplishing this. The reason of such behavior  
 382 is as follows: thanks to large magnitude of  $W_1$  and  $W_2$  in prospective configuration, an error on the output  
 383 unit results in a large error on the hidden unit, so the network is able to quickly flip the sign of  $W_0$  whenever  
 384 the observation mismatches the expectation. This results in an increased expectation on the Switch trials

385 (panel c).

386 Taken together, presented three simulations illustrate that prospective configuration is a common  
387 principle that can explain a range of surprising learning effects in diverse tasks.

## 388 Discussion

389 Our paper identifies the principle of prospective configuration, according to which learning relies on  
390 neurons first optimizing their pattern of activity to match the correct output, and then reinforcing these  
391 prospective activities through synaptic plasticity. Although it was known that in energy-based networks the  
392 activity of neurons shifts before weight update, it has been previously thought that this shift is a necessary  
393 cost of error propagation in biological networks, and several methods have been proposed to suppress  
394 it<sup>24,25,33,47,48</sup> to approximate backpropagation more closely. By contrast, we demonstrate that this  
395 reconfiguration of neural activity is the key to achieving learning performance superior to backpropagation,  
396 and to explaining experimental data from diverse learning tasks. Prospective configuration further offers a  
397 range of experimental predictions distinct from those of backpropagation (Extended Data Figs. 10–11). In  
398 sum, we have demonstrated that our novel credit assignment principle of prospective configuration enables  
399 more efficient learning than backpropagation by reducing interference, superior performance in situations  
400 faced by biological organisms, requires only local computation and plasticity, and can match experimental  
401 data across a wide range of tasks.

402 Our theory addresses a long-standing question of how the brain solves the plasticity-stability dilemma,  
403 e.g., how it is possible that despite learning and adjustment of representation in primary visual cortex<sup>83</sup>,  
404 we can still perceive the world and understand the meaning of visual stimuli we learned over our lifetime.  
405 According to prospective configuration, when some weights are modified during learning, compensatory  
406 changes are made to other weights, to ensure the stability of previously acquired knowledge. Previous  
407 computational models have also proposed mechanisms reducing interference between different pieces of  
408 learned information<sup>72,84</sup>, and it is highly likely that these mechanisms operate in the brain in addition to  
409 prospective configuration and jointly reduce the interference most effectively.

410 From one view, prospective configuration could be seen as moving machine learning closer to in-  
411 ference and learning procedures in statistical modelling and system identification. For example, if the  
412 “energy” in energy-based schemes is variational free energy, i.e., the evidence lower bound (ELBO),  
413 prospective configuration can be seen as an implementation of variational Bayes that subsumes inference  
414 and learning<sup>85–89</sup>. Perhaps the closest example of this is dynamic expectation maximization<sup>90,91</sup>. Dynamic  
415 expectation maximization (DEM) can be regarded as a generalization of predictive coding networks, in  
416 which the D-step optimizes representations of latent states (cf., relaxation till convergence), while the  
417 E-step optimizes model parameters (cf., weight modification). These two steps can be read as inference  
418 and learning respectively. This lends an interesting interpretation to prospective configuration, in the sense  
419 that the neuronal dynamics can be understood as inference (that prospectively precedes learning), while  
420 weight dynamics underwrite learning. This can be contrasted with backpropagation and amortization in  
421 standard machine learning approaches, which is limited to learning. In short, prospective configuration  
422 introduces inference into the optimization procedure to ensure optimal learning. It therefore shares with  
423 predictive coding networks a dual aspect optimization that can be regarded as a Bayesian filter with learn-  
424 able parameters. One might ask what the M-step comprises in DEM. This corresponds to optimization  
425 of precision parameters that play the role of learning rates. In the computational neuroscience literature  
426 this corresponds to attention; namely, selecting precise prediction errors for local optimization of both  
427 neural and weight dynamics. We hope to consider this kind of extension by pursuing the close relationship  
428 between prospective configuration and (generalized) predictive coding networks in future work.

429 Other recent work<sup>92,93</sup> also noticed that the natural form of energy-based networks (“strong control”  
430 in their words) perform different learning comparing to backpropagation or approximations of backpropa-  
431 gation. Their analysis concentrates on an architecture of deep feedback control, and they demonstrated  
432 that particular form of their model is equivalent to predictive coding networks<sup>93</sup>. The unique contribution  
433 of our paper is to show the benefits of such strong control and explain why they arise.

434 Predictive coding networks require symmetric forward and backward weights between layers of  
435 neurons, so a question arises how such symmetry may develop in the brain. If predictive coding networks  
436 are initialized with symmetric weights (as in our simulations), the symmetry will persist, because the  
437 changes of a weight between neurons A and B are the same as for the feedback weight (between neurons  
438 B and A). Even if the weights are not initialized symmetrically, the symmetry may develop if synaptic  
439 decay is included in the model<sup>94</sup>, because then the initial asymmetric values decay away and weight  
440 values become more influenced by recent changes that are symmetric. Nevertheless the weight symmetry  
441 is not generally required for effective credit assignment, as it has been demonstrated that multilayer<sup>26</sup>  
442 and recurrent<sup>95</sup> neural networks can learn from errors propagated by feedback weights that are randomly  
443 generated, and hence asymmetric. Similarly weight symmetry is not essential for prospective configuration,  
444 as energy-based networks similar to predictive coding networks can work even if the weights are not  
445 symmetric<sup>96</sup>.

446 In this paper, we assumed for simplicity that the convergence of neural activity to an equilibrium  
447 happens rapidly after the stimuli are provided, so that the synaptic weight modification after convergence  
448 may take place while the stimuli are still present. However, the stimuli biological brains receive may  
449 be present very briefly or constantly change. Nevertheless, predictive coding networks can still work  
450 even if weight modification takes place while the neural activity is converging. Specifically, Song et al.  
451 demonstrate that if neural activities are only updated for the first few steps, the update of the weights is  
452 equivalent to that in backpropagation<sup>33</sup>. While, as a reminder, this manuscript demonstrates that if the  
453 neural activities are updated to equilibrium, the update of the weights follows the principle of prospective  
454 configuration, distinct from backpropagation and possesses the desirable properties demonstrated. Thus, a  
455 learning rule where neural activities and weights are updated in parallel will experience weights update  
456 that is equivalent to backpropagation at the start and then moves to prospective configuration as the system  
457 converges to equilibrium. We call this variant *parallel predictive coding*, which has been extensively  
458 studied in the Chapter 5 of the thesis from Song<sup>97</sup>. Furthermore, predictive coding networks have been  
459 extended to describe recurrent structures<sup>98–100</sup>, and it has been shown that such networks can learn to  
460 predict dynamically changing stimuli even if weights are modified before the activity converged for a  
461 given “frame” of the stimulus<sup>99</sup>.

462 The advantages of prospective configuration suggest that it may be profitably applied in machine  
463 learning to improve the efficiency and performance of deep neural networks. An obstacle for this is that the  
464 relaxation phase is computationally expensive. However, in recent work on parallel predictive coding we  
465 demonstrated that by modifying weights after each step of relaxation, the model becomes comparably fast  
466 as backpropagation and easier for parallelization<sup>97</sup>. Another approach to making energy-based networks  
467 more computationally efficient is to train them to predict their state following the relaxation<sup>101</sup>. Most  
468 intriguingly, it has been demonstrated that the speed of energy-based networks can be greatly increased  
469 by implementing the relaxation on analog hardware<sup>102,103</sup>, potentially resulting in energy-based network  
470 being faster than backpropagation. Therefore, we anticipate that our discoveries may change the blueprint  
471 of next-generation machine learning hardware — switching from the current digital tensor base to analog  
472 hardware, being closer to the brain and potentially far more efficient.



## 473 References

- 474 1. Lillicrap, T. P., Santoro, A., Marris, L., Akerman, C. J. & Hinton, G. Backpropagation and the brain. *Nat. Rev.*  
475 *Neurosci.* **21**, 335–346 (2020).
- 476 2. Werbos, P. Beyond regression: new tools for prediction and analysis in the behavioral sciences. *Ph. D.*  
477 *dissertation, Harv. Univ.* (1974).
- 478 3. Rumelhart, D. E., Hinton, G. E. & Williams, R. J. Learning internal representations by error propagation.  
479 Tech. Rep., California Univ San Diego La Jolla Inst for Cognitive Science (1985).
- 480 4. Parker, D. B. Learning-logic: Casting the cortex of the human brain in silicon. *Tech. report TR-47* (1985).
- 481 5. LeCun, Y., Bengio, Y. & Hinton, G. Deep learning. *Nature* **521**, 436–444 (2015).
- 482 6. Krizhevsky, A., Sutskever, I. & Hinton, G. E. ImageNet classification with deep convolutional neural networks.  
483 In *Advances in Neural Information Processing Systems (NeurIPS)*, vol. 25, 1097–1105 (2012).
- 484 7. He, H., Boyd-Graber, J., Kwok, K. & Daum III, H. Opponent modeling in deep reinforcement learning. In  
485 *Proceedings of the International Conference on Machine Learning (ICML)* (2016).
- 486 8. Hannun, A. *et al.* Deep speech: Scaling up end-to-end speech recognition. *arXiv preprint arXiv:1412.5567*  
487 (2014).
- 488 9. Vaswani, A. *et al.* Attention is all you need. In *Advances in Neural Information Processing Systems (NeurIPS)*,  
489 5998–6008 (2017).
- 490 10. Mnih, V. *et al.* Human-level control through deep reinforcement learning. *Nature* (2015).
- 491 11. Silver, D. *et al.* Mastering the game of go with deep neural networks and tree search. *Nature* **529**, 484–489  
492 (2016).
- 493 12. Richards, B. A. *et al.* A deep learning framework for neuroscience. *Nat. Neurosci.* **22**, 1761–1770 (2019).
- 494 13. Zipser, D. & Andersen, R. A. A back-propagation programmed network that simulates response properties of  
495 a subset of posterior parietal neurons. *Nature* **331**, 679–684 (1988).
- 496 14. Singer, Y. *et al.* Sensory cortex is optimized for prediction of future input. *Elife* **7**, e31557 (2018).
- 497 15. Cadieu, C. F. *et al.* Deep neural networks rival the representation of primate it cortex for core visual object  
498 recognition. *PLoS Comput. Biol.* **10**, e1003963 (2014).
- 499 16. Yamins, D. L. *et al.* Performance-optimized hierarchical models predict neural responses in higher visual  
500 cortex. *Proc. Natl. Acad. Sci.* **111**, 8619–8624 (2014).
- 501 17. Khaligh-Razavi, S.-M. & Kriegeskorte, N. Deep supervised, but not unsupervised, models may explain it  
502 cortical representation. *PLoS Comput. Biol.* **10** (2014).
- 503 18. Yamins, D. L. & DiCarlo, J. J. Using goal-driven deep learning models to understand sensory cortex. *Nat.*  
504 *Neurosci.* **19**, 356 (2016).
- 505 19. Kell, A. J., Yamins, D. L., Shook, E. N., Norman-Haignere, S. V. & McDermott, J. H. A task-optimized  
506 neural network replicates human auditory behavior, predicts brain responses, and reveals a cortical processing  
507 hierarchy. *Neuron* **98**, 630–644 (2018).
- 508 20. Whittington, J. C. *et al.* The tolmán-eichenbaum machine: Unifying space and relational memory through  
509 generalization in the hippocampal formation. *Cell* **183**, 1249–1263 (2020).
- 510 21. Banino, A. *et al.* Vector-based navigation using grid-like representations in artificial agents. *Nature* **557**,  
511 429–433 (2018).
- 512 22. Sacramento, J., Costa, R. P., Bengio, Y. & Senn, W. Dendritic cortical microcircuits approximate the  
513 backpropagation algorithm. In *Advances in Neural Information Processing Systems (NeurIPS)*, 8721–8732  
514 (2018).

- 515 **23.** Guerguiev, J., Lillicrap, T. P. & Richards, B. A. Towards deep learning with segregated dendrites. *Elife* **6**,  
516 e22901 (2017).
- 517 **24.** Scellier, B. & Bengio, Y. Equilibrium propagation: Bridging the gap between energy-based models and  
518 backpropagation. *Front. Comput. Neurosci.* **11**, 24 (2017).
- 519 **25.** Whittington, J. C. & Bogacz, R. An approximation of the error backpropagation algorithm in a predictive  
520 coding network with local hebbian synaptic plasticity. *Neural Comput.* **29**, 1229–1262 (2017).
- 521 **26.** Lillicrap, T. P., Cownden, D., Tweed, D. B. & Akerman, C. J. Random synaptic feedback weights support  
522 error backpropagation for deep learning. *Nat. Commun.* **7**, 1–10 (2016).
- 523 **27.** Roelfsema, P. R. & Ooyen, A. v. Attention-gated reinforcement learning of internal representations for  
524 classification. *Neural Comput.* **17**, 2176–2214 (2005).
- 525 **28.** Pozzi, I., Bohté, S. & Roelfsema, P. A biologically plausible learning rule for deep learning in the brain. *arXiv*  
526 *preprint arXiv:1811.01768* (2018).
- 527 **29.** Körding, K. P. & König, P. Supervised and unsupervised learning with two sites of synaptic integration. *J.*  
528 *Comput. Neurosci.* **11**, 207–215 (2001).
- 529 **30.** Richards, B. A. & Lillicrap, T. P. Dendritic solutions to the credit assignment problem. *Curr. Opin. Neurobiol.*  
530 **54**, 28–36 (2019).
- 531 **31.** Payeur, A., Guerguiev, J., Zenke, F., Richards, B. A. & Naud, R. Burst-dependent synaptic plasticity can  
532 coordinate learning in hierarchical circuits. *Nat. Neurosci.* 1–10 (2021).
- 533 **32.** Whittington, J. C. & Bogacz, R. Theories of error back-propagation in the brain. *Trends Cogn. Sci.* (2019).
- 534 **33.** Song, Y., Lukasiewicz, T., Xu, Z. & Bogacz, R. Can the brain do backpropagation?—Exact implementation  
535 of backpropagation in predictive coding networks. In *Advances in Neural Information Processing Systems*  
536 (*NeurIPS*), vol. 33, 22566 (Europe PMC Funders, 2020).
- 537 **34.** Salvatori, T., Song, Y., Lukasiewicz, T., Bogacz, R. & Xu, Z. Reverse differentiation via predictive coding. In  
538 *Proceedings of the AAAI Conference on Artificial Intelligence* (2022).
- 539 **35.** Tsividis, P. A., Pouncy, T., Xu, J. L., Tenenbaum, J. B. & Gershman, S. J. Human learning in atari. In *2017*  
540 *AAAI Spring Symposium Series* (2017).
- 541 **36.** McCloskey, M. & Cohen, N. J. Catastrophic interference in connectionist networks: The sequential learning  
542 problem. In *Psychology of Learning and Motivation*, vol. 24, 109–165 (Elsevier, 1989).
- 543 **37.** McNaughton, B. L. & O’Reilly, R. C. Why there are complementary learning systems in the hippocampus and  
544 neocortex: Insights from the successes and failures of. *Psychol. Rev.* **102**, 419–457 (1995).
- 545 **38.** Hopfield, J. J. Neural networks and physical systems with emergent collective computational abilities. *Proc.*  
546 *Natl. Acad. Sci.* **79**, 2554–2558 (1982).
- 547 **39.** Friston, K. A theory of cortical responses. *Philos. Transactions Royal Soc. B: Biol. sciences* **360**, 815–836  
548 (2005).
- 549 **40.** Rao, R. P. & Ballard, D. H. Predictive coding in the visual cortex: A functional interpretation of some  
550 extra-classical receptive-field effects. *Nat. Neurosci.* **2**, 79–87 (1999).
- 551 **41.** Friston, K. The free-energy principle: A unified brain theory? *Nat. Rev. Neurosci.* **11**, 127–138 (2010).
- 552 **42.** Hohwy, J., Roepstorff, A. & Friston, K. Predictive coding explains binocular rivalry: An epistemological  
553 review. *Cognition* **108**, 687–701 (2008).
- 554 **43.** Auztulewicz, R. & Friston, K. Repetition suppression and its contextual determinants in predictive coding.  
555 *Cortex* **80**, 125–140 (2016).

- 556 **44.** Watanabe, E., Kitaoka, A., Sakamoto, K., Yasugi, M. & Tanaka, K. Illusory motion reproduced by deep neural  
557 networks trained for prediction. *Front. psychology* **9**, 345 (2018).
- 558 **45.** Feldman, H. & Friston, K. Attention, uncertainty, and free-energy. *Front. human neuroscience* **4**, 215 (2010).
- 559 **46.** Kanai, R., Komura, Y., Shipp, S. & Friston, K. Cerebral hierarchies: predictive processing, precision and the  
560 pulvinar. *Philos. Transactions Royal Soc. B: Biol. Sci.* **370**, 20140169 (2015).
- 561 **47.** Millidge, B., Tschantz, A. & Buckley, C. L. Predictive coding approximates backprop along arbitrary  
562 computation graphs. *arXiv preprint arXiv:2006.04182* (2020).
- 563 **48.** Bengio, Y. & Fischer, A. Early inference in energy-based models approximates back-propagation. *arXiv*  
564 *preprint arXiv:1510.02777* (2015).
- 565 **49.** O'reilly, R. C. & Munakata, Y. *Computational explorations in cognitive neuroscience: Understanding the*  
566 *mind by simulating the brain* (MIT Press Cambridge, 2000).
- 567 **50.** Quilodran, R., Rothe, M. & Procyk, E. Behavioral shifts and action valuation in the anterior cingulate cortex.  
568 *Neuron* **57**, 314–325 (2008).
- 569 **51.** Wallis, J. D. & Kennerley, S. W. Heterogeneous reward signals in prefrontal cortex. *Curr. opinion neurobiology*  
570 **20**, 191–198 (2010).
- 571 **52.** Buckley, C. L., Kim, C. S., McGregor, S. & Seth, A. K. The free energy principle for action and perception: A  
572 mathematical review. *J. Math. Psychol.* **81**, 55–79 (2017).
- 573 **53.** Hinton, G. E. Training products of experts by minimizing contrastive divergence. *Neural computation* **14**,  
574 1771–1800 (2002).
- 575 **54.** LeCun, Y., Chopra, S., Hadsell, R., Ranzato, M. & Huang, F. A tutorial on energy-based learning. *Predict.*  
576 *structured data* **1** (2006).
- 577 **55.** Hinton, G. E. A practical guide to training restricted boltzmann machines. In *Neural networks: Tricks of the*  
578 *trade*, 599–619 (Springer, 2012).
- 579 **56.** Xiao, H., Rasul, K. & Vollgraf, R. Fashion MNIST: A novel image dataset for benchmarking machine learning  
580 algorithms. *arXiv preprint arXiv:1708.07747* (2017).
- 581 **57.** Bengio, Y. How auto-encoders could provide credit assignment in deep networks via target propagation. *arXiv*  
582 *preprint arXiv:1407.7906* (2014).
- 583 **58.** Meulemans, A., Carzaniga, F. S., Suykens, J. A., Sacramento, J. & Grewe, B. F. A theoretical framework for  
584 target propagation. *arXiv preprint arXiv:2006.14331* (2020).
- 585 **59.** Felleman, D. J. & Van Essen, D. C. Distributed hierarchical processing in the primate cerebral cortex. *Cereb.*  
586 *Cortex* **1**, 1–47 (1991).
- 587 **60.** Fontenla-Romero, Ó., Guijarro-Berdiñas, B., Martínez-Rego, D., Pérez-Sánchez, B. & Peteiro-Barral, D.  
588 Online machine learning. In *Efficiency and Scalability Methods for Computational Intellect*, 27–54 (IGI  
589 Global, 2013).
- 590 **61.** Hinton, G. E. *et al.* Learning distributed representations of concepts. In *Proceedings of the eighth annual*  
591 *conference of the cognitive science society*, vol. 1, 12 (Amherst, MA, 1986).
- 592 **62.** Hassabis, D., Kumaran, D., Summerfield, C. & Botvinick, M. Neuroscience-inspired artificial intelligence.  
593 *Neuron* **95**, 245–258 (2017).
- 594 **63.** Gama, J., Žliobaitė, I., Bifet, A., Pechenizkiy, M. & Bouchachia, A. A survey on concept drift adaptation.  
595 *ACM Comput. Surv. (CSUR)* **46**, 1–37 (2014).
- 596 **64.** O'Shea, K. & Nash, R. An introduction to convolutional neural networks. *arXiv preprint arXiv:1511.08458*  
597 (2015).

- 598 **65.** Krizhevsky, A. & Hinton, G. Learning multiple layers of features from tiny images. *Report* (2009).
- 599 **66.** Jia, X. *et al.* Highly scalable deep learning training system with mixed-precision: Training imagenet in four  
600 minutes. *arXiv preprint arXiv:1807.11205* (2018).
- 601 **67.** Puri, R., Kirby, R., Yakovenko, N. & Catanzaro, B. Large scale language modeling: Converging on 40gb of  
602 text in four hours. In *2018 30th International Symposium on Computer Architecture and High Performance*  
603 *Computing (SBAC-PAD)*, 290–297 (IEEE, 2018).
- 604 **68.** Berner, C. *et al.* Dota 2 with large scale deep reinforcement learning. *arXiv preprint arXiv:1912.06680* (2019).
- 605 **69.** Ioffe, S. & Szegedy, C. Batch normalization: Accelerating deep network training by reducing internal covariate  
606 shift. In *Proceedings of the International Conference on Machine Learning (ICML)* (2015).
- 607 **70.** Ratcliff, R. Connectionist models of recognition memory: Constraints imposed by learning and forgetting  
608 functions. *Psychol. review* **97**, 285 (1990).
- 609 **71.** French, R. M. Catastrophic forgetting in connectionist networks. *Trends cognitive sciences* **3**, 128–135 (1999).
- 610 **72.** Zenke, F., Poole, B. & Ganguli, S. Continual learning through synaptic intelligence. In *International*  
611 *Conference on Machine Learning*, 3987–3995 (PMLR, 2017).
- 612 **73.** Sutton, R. S. & Barto, A. G. *Introduction to Reinforcement Learning*, vol. 2 (MIT Press Cambridge, 1998).
- 613 **74.** Hampton, A. N., Bossaerts, P. & O’doherly, J. P. The role of the ventromedial prefrontal cortex in abstract  
614 state-based inference during decision making in humans. *J. Neurosci.* **26**, 8360–8367 (2006).
- 615 **75.** Heald, J. B., Lengyel, M. & Wolpert, D. M. Contextual inference underlies the learning of sensorimotor  
616 repertoires. *Nature* **600**, 489–493 (2021).
- 617 **76.** Larsen, T., Leslie, D. S., Collins, E. J. & Bogacz, R. Posterior weighted reinforcement learning with state  
618 uncertainty. *Neural computation* **22**, 1149–1179 (2010).
- 619 **77.** Kaufman, M. A. & Bolles, R. C. A nonassociative aspect of overshadowing. *Bull. Psychon. Soc.* **18**, 318–320  
620 (1981).
- 621 **78.** Matzel, L. D., Schachtman, T. R. & Miller, R. R. Recovery of an overshadowed association achieved by  
622 extinction of the overshadowing stimulus. *Learn. Motiv.* **16**, 398–412 (1985).
- 623 **79.** Matzel, L. D., Shuster, K. & Miller, R. R. Covariation in conditioned response strength between stimuli trained  
624 in compound. *Animal Learn. & Behav.* **15**, 439–447 (1987).
- 625 **80.** Hallam, S. C., Matzel, L. D., Sloat, J. S. & Miller, R. R. Excitation and inhibition as a function of posttraining  
626 extinction of the excitatory cue used in pavlovian inhibition training. *Learn. Motiv.* **21**, 59–84 (1990).
- 627 **81.** Miller, R. R., Esposito, J. J. & Grahame, N. J. Overshadowing-like effects between potential comparator  
628 stimuli: Covariation in comparator roles of context and punctate excitor used in inhibitory training as a function  
629 of excitor salience. *Learn. Motiv.* **23**, 1–26 (1992).
- 630 **82.** Rescorla, R. A. A theory of pavlovian conditioning: Variations in the effectiveness of reinforcement and  
631 nonreinforcement. *Curr. research theory* 64–99 (1972).
- 632 **83.** Poort, J. *et al.* Learning enhances sensory and multiple non-sensory representations in primary visual cortex.  
633 *Neuron* **86**, 1478–1490 (2015).
- 634 **84.** McClelland, J. L., McNaughton, B. L. & O’Reilly, R. C. Why there are complementary learning systems in  
635 the hippocampus and neocortex: insights from the successes and failures of connectionist models of learning  
636 and memory. *Psychol. review* **102**, 419 (1995).
- 637 **85.** Dauwels, J. On variational message passing on factor graphs. In *2007 IEEE International Symposium on*  
638 *Information Theory*, 2546–2550 (IEEE, 2007).

- 639 **86.** Dayan, P. & Hinton, G. E. Using expectation-maximization for reinforcement learning. *Neural Comput.* **9**,  
640 271–278 (1997).
- 641 **87.** Hinton, G. E. & Zemel, R. Autoencoders, minimum description length and helmholtz free energy. *Adv. neural*  
642 *information processing systems* **6** (1993).
- 643 **88.** Neal, R. M. & Hinton, G. E. A view of the em algorithm that justifies incremental, sparse, and other variants.  
644 In *Learning in graphical models*, 355–368 (Springer, 1998).
- 645 **89.** Winn, J., Bishop, C. M. & Jaakkola, T. Variational message passing. *J. Mach. Learn. Res.* **6** (2005).
- 646 **90.** Anil Meera, A. & Wisse, M. Dynamic expectation maximization algorithm for estimation of linear systems  
647 with colored noise. *Entropy* **23**, 1306 (2021).
- 648 **91.** Friston, K. Hierarchical models in the brain. *PLoS computational biology* **4**, e1000211 (2008).
- 649 **92.** Meulemans, A., Farinha, M. T., Cervera, M. R., Sacramento, J. & Grewe, B. F. Minimizing control for credit  
650 assignment with strong feedback. *arXiv preprint arXiv:2204.07249* (2022).
- 651 **93.** Meulemans, A., Zucchet, N., Kobayashi, S., von Oswald, J. & Sacramento, J. The least-control principle for  
652 learning at equilibrium. *arXiv preprint arXiv:2207.01332* (2022).
- 653 **94.** Akrouf, M., Wilson, C., Humphreys, P., Lillicrap, T. & Tweed, D. B. Deep learning without weight transport.  
654 *Adv. neural information processing systems* **32** (2019).
- 655 **95.** Gilra, A. & Gerstner, W. Predicting non-linear dynamics by stable local learning in a recurrent spiking neural  
656 network. *Elife* **6**, e28295 (2017).
- 657 **96.** Millidge, B., Tschantz, A. & Buckley, C. L. Relaxing the constraints on predictive coding models. *arXiv*  
658 *preprint arXiv:2010.01047* (2020).
- 659 **97.** Song, Y. *Predictive coding inspires effective alternatives to backpropagation*. Ph.D. thesis, Department of  
660 Computer Science & Medical Research Council Brain Network Dynamics Unit (2022).
- 661 **98.** Friston, K. J., Trujillo-Barreto, N. & Daunizeau, J. Dem: a variational treatment of dynamic systems.  
662 *Neuroimage* **41**, 849–885 (2008).
- 663 **99.** Millidge, B., Tschantz, A., Seth, A. & Buckley, C. Neural kalman filtering. *arXiv preprint arXiv:2102.10021*  
664 (2021).
- 665 **100.** Salvatori, T. *et al.* Learning on arbitrary graph topologies via predictive coding. *arXiv preprint*  
666 *arXiv:2201.13180* (2022).
- 667 **101.** Haider, P. *et al.* Latent equilibrium: A unified learning theory for arbitrarily fast computation with arbitrarily  
668 slow neurons. In *Advances in Neural Information Processing Systems (NeurIPS)*, vol. 34, 17839–17851  
669 (2021).
- 670 **102.** Foroushani, A. N., Assaf, H., Noshahr, F. H., Savaria, Y. & Sawan, M. Analog circuits to accelerate the  
671 relaxation process in the equilibrium propagation algorithm. In *2020 IEEE International Symposium on*  
672 *Circuits and Systems (ISCAS)*, 1–5 (IEEE, 2020).
- 673 **103.** Hertz, J., Krogh, A., Lautrup, B. & Lehmann, T. Nonlinear backpropagation: Doing backpropagation without  
674 derivatives of the activation function. *IEEE Transactions on Neural Networks* **8**, 1321–1327 (1997).
- 675 **104.** Goodfellow, I., Bengio, Y. & Courville, A. *Deep learning* (MIT Press Cambridge, 2016).
- 676 **105.** O’Reilly, R. C. Biologically plausible error-driven learning using local activation differences: The generalized  
677 recirculation algorithm. *Neural Comput.* **8**, 895–938 (1996).
- 678 **106.** Almeida, L. B. A learning rule for asynchronous perceptrons with feedback in a combinatorial environment.  
679 In *Artificial Neural Networks: Concept Learning*, 102–111 (IEEE Computer Society Press, 1990).

- 680 **107.** Pineda, F. Generalization of back propagation to recurrent and higher order neural networks. In *Advances in*  
681 *Neural Information Processing Systems (NeurIPS)*, 602–611 (1987).
- 682 **108.** Pineda, F. J. Dynamics and architecture for neural computation. *J. Complex.* **4**, 216–245 (1988).
- 683 **109.** Hebb, D. O. *The organisation of behaviour: A neuropsychological theory* (Science Editions New York, 1949).
- 684 **110.** Glorot, X. & Bengio, Y. Understanding the difficulty of training deep feedforward neural networks. In  
685 *Proceedings of the thirteenth international conference on artificial intelligence and statistics*, 249–256 (JMLR  
686 Workshop and Conference Proceedings, 2010).
- 687 **111.** Tolstikhin, I. O. *et al.* Mlp-mixer: An all-mlp architecture for vision. *Adv. Neural Inf. Process. Syst.* **34**,  
688 24261–24272 (2021).
- 689 **112.** Žliobaitė, I. Learning under concept drift: An overview. *arXiv preprint arXiv:1010.4784* (2010).
- 690 **113.** Tsymbal, A. The problem of concept drift: Definitions and related work. *Comput. Sci. Dep. Trinity Coll.*  
691 *Dublin* **106**, 58 (2004).
- 692 **114.** Sutton, R. S. Generalization in reinforcement learning: Successful examples using sparse coarse coding. In  
693 *Advances in Neural Information Processing Systems (NeurIPS)*, vol. 8 (1995).
- 694 **115.** Geramifard, A., Dann, C., Klein, R. H., Dabney, W. & How, J. P. RLPy: A value-function-based reinforcement  
695 learning framework for education and research. *J. Mach. Learn. Res.* **16**, 1573–1578 (2015).
- 696 **116.** Moore, A. Efficient memory-based learning for robot control. Tech. Rep., Carnegie Mellon University,  
697 Pittsburgh, PA (1990).
- 698 **117.** Barto, A. G., Sutton, R. S. & Anderson, C. W. Neuronlike adaptive elements that can solve difficult learning  
699 control problems. *IEEE Transactions on Syst. Man, Cybern.* 834–846 (1983).
- 700 **118.** Brockman, G. *et al.* Openai gym. *arXiv:1606.01540* (2016).
- 701 **119.** Welford, B. Note on a method for calculating corrected sums of squares and products. *Technometrics* **4**,  
702 419–420 (1962).
- 703 **120.** Knuth, D. E. *Art of computer programming, volume 2: Seminumerical algorithms* (Addison-Wesley Profes-  
704 sional, 2014).
- 705 **121.** Bastos, A. M. *et al.* Canonical microcircuits for predictive coding. *Neuron* **76**, 695–711 (2012).
- 706 **122.** Lee, D.-H., Zhang, S., Fischer, A. & Bengio, Y. Difference target propagation. In *Joint European Conference*  
707 *on Machine Learning and Knowledge Discovery in Databases*, 498–515 (Springer, 2015).
- 708 **123.** Saxe, A. M., McClelland, J. L. & Ganguli, S. Exact solutions to the nonlinear dynamics of learning in deep  
709 linear neural networks. *arXiv preprint arXiv:1312.6120* (2013).
- 710 **124.** Meulemans, A. *et al.* Credit assignment in neural networks through deep feedback control. *Adv. Neural Inf.*  
711 *Process. Syst.* **34**, 4674–4687 (2021).
- 712 **125.** Keller, G. B. & Mrsic-Flogel, T. D. Predictive processing: A canonical cortical computation. *Neuron* **100**,  
713 424–435 (2018).
- 714 **126.** Attinger, A., Wang, B. & Keller, G. B. Visuomotor coupling shapes the functional development of mouse  
715 visual cortex. *Cell* **169**, 1291–1302 (2017).
- 716 **127.** Boerlin, M., Machens, C. K. & Denève, S. Predictive coding of dynamical variables in balanced spiking  
717 networks. *PLoS Comput. Biol.* **9**, e1003258 (2013).
- 718 **128.** Brendel, W., Bourdoukan, R., Verterchi, P., Machens, C. K. & Denève, S. Learning to represent signals spike  
719 by spike. *PLoS Comput. Biol.* **16**, e1007692 (2020).

- 720 **129.** Heekeren, H. R., Marrett, S., Bandettini, P. A. & Ungerleider, L. G. A general mechanism for perceptual  
721 decision-making in the human brain. *Nature* **431**, 859–862 (2004).
- 722 **130.** Krotov, D. & Hopfield, J. J. Dense associative memory for pattern recognition. In *Advances in Neural*  
723 *Information Processing Systems (NeurIPS)*, vol. 29, 1172–1180 (2016).
- 724 **131.** Soto, V., Suárez, A. & Martínez-Muñoz, G. An urn model for majority voting in classification ensembles.  
725 In *Advances in Neural Information Processing Systems (NeurIPS)* (Neural Information Processing Systems  
726 Foundation, 2016).
- 727 **132.** Bengio, Y., Mesnard, T., Fischer, A., Zhang, S. & Wu, Y. Stp as presynaptic activity times rate of change of  
728 postsynaptic activity. *arXiv preprint arXiv:1509.05936* (2015).
- 729 **133.** Penrose, R. A generalized inverse for matrices. In *Mathematical proceedings of the Cambridge philosophical*  
730 *society*, vol. 51, 406–413 (Cambridge University Press, 1955).

## 731 Methods

732 This section provides necessary details for replication of results in the main text.

### 733 Models

734 Throughout this work, we compare the established theory of *backpropagation* to the proposed new  
735 principle of *prospective configuration*. As explained in the main text, backpropagation is used to train  
736 *artificial neural networks* (ANNs), where the activity of a neuron is *fixed* to a value based on its input,  
737 while prospective configuration occurs in *energy-based networks* (EBNs), where the activity of a neuron is  
738 *not* fixed.

739 Since in ANNs the activity of neurons  $\mathbf{x}$  is determined by their input, the output of the network can  
740 be obtained by propagating the inputs “forward” through the computational graph. The output can then  
741 be compared against a target pattern to get a measure of difference known as a *loss*. Since the value of a  
742 node (activity of a neuron) in the computational graph is explicitly computed as a function of its input, the  
743 computational graph is usually differentiable. Thus, training ANNs with backpropagation modifies the  
744 weights  $\mathbf{w}$  to take a step towards the negative gradient of loss  $L$ ,

$$\Delta \mathbf{w} = -\alpha \frac{\partial L}{\partial \mathbf{w}}, \quad (1)$$

745 during which the activity of neurons  $\mathbf{x}$  is fixed, and  $\alpha$  is learning rate. The weights  $\mathbf{w}$  requiring modification  
746 might be many steps away from the output on the computational graph, where the loss  $L$  is computed; thus,  
747  $\frac{\partial L}{\partial \mathbf{w}}$  is often obtained by applying the chain rule of computing a derivative through intermediate variables  
748 (activity of output and hidden neurons). For example, consider a network with 4 layers and let  $\mathbf{x}^l$  denote  
749 the activity of neurons in layer  $l$ , while  $\mathbf{w}^l$  denote the weights of connections between layers  $l$  and  $l + 1$ .  
750 Then the change in the weights originating from the first layer is computed:  $\frac{\partial L}{\partial \mathbf{w}^1} = \frac{\partial L}{\partial \mathbf{x}^4} \cdot \frac{\partial \mathbf{x}^4}{\partial \mathbf{x}^3} \cdots \frac{\partial \mathbf{x}^2}{\partial \mathbf{w}^1}$ . This  
751 enables the loss to be backpropagated through the graph to provide a direction of update for all weights.

752 In contrast to ANNs, in EBNs, the activity of neurons  $\mathbf{x}$  is not fixed to the input from a previous layer.  
753 Instead, an energy function  $E$  is defined as a function of the neural activity  $\mathbf{x}$  and weights  $\mathbf{w}$ . For networks  
754 organized in layers (considered in this paper), the energy can be decomposed into a sum of local energy  
755 terms  $E^l$ :

$$E = \sum_l E^l(\mathbf{x}^l, \mathbf{w}^{l-1}, \mathbf{x}^{l-1}). \quad (2)$$

756 Here,  $E^l$  is called local energy, because it is a function of  $\mathbf{x}^l$ ,  $\mathbf{x}^{l-1}$ , and  $\mathbf{w}^{l-1}$  that are neighbours and  
757 connected to each other. This ensures that the optimization of energy  $E$  can be implemented by local  
758 circuits, because the derivative of  $E$  with respect to any neural activity (or weights) results in an equation  
759 containing only the local activity (or weights) and the activity of adjacent neurons. Predictions with EBNs  
760 are computed by clamping the input neurons to an input pattern, and then modifying the activity of all  
761 other neurons to decrease the energy:

$$\Delta \mathbf{x} = -\gamma \frac{\partial E}{\partial \mathbf{x}}, \quad (3)$$

762 where  $\gamma$  is the integration step of the neural dynamics. Since the terms in  $E$  can be divided into local energy  
763 terms, this results in an equation that can be implemented with local circuits. This process of modifying  
764 the neural activity to decrease the energy is called *relaxation*, and we refer to the equation describing  
765 relaxation as *neural dynamics* — because it describes the dynamics of the neural activity in EBNs. After



766 convergence of relaxation, the activities of the output neurons are taken as the prediction made by the  
 767 EBN. Different EBNs are trained in slightly different ways. In case of *predictive coding network*<sup>25,40,52</sup>  
 768 (PCN), training involves clamping the input and output neurons to input and target patterns, respectively.  
 769 Then, relaxation is run until convergence ( $\mathbf{x} = \mathbf{x}^*$ ), after which the weights are updated using the activity at  
 770 convergence to further decrease the energy:

$$\Delta \mathbf{w} = -\alpha \left. \frac{\partial E}{\partial \mathbf{w}} \right|_{\mathbf{x}=\mathbf{x}^*}. \quad (4)$$

771 This will also result in an equation that can be implemented with local plasticity since it is just a gradient  
 772 descent on the local energy. We refer to such an equation as *weight dynamics*, because it describes the  
 773 dynamics of the synaptic weights in EBNs.

774 Backpropagation and prospective configuration are not restricted to specific models. Depending on  
 775 the structure of the network, and the choice of the energy function, one can define different models that  
 776 implement the principle of backpropagation or prospective configuration. In the main text and most of the  
 777 Extended Data, we investigate the most standard layered network. In this case, both ANNs and EBNs  
 778 include  $L$  layers of weights  $\mathbf{w}^1, \mathbf{w}^2, \dots, \mathbf{w}^L$ , and  $L+1$  layers of neurons  $\mathbf{x}^1, \mathbf{x}^2, \dots, \mathbf{x}^{L+1}$ , where  $\mathbf{x}^1$  and  $\mathbf{x}^{L+1}$   
 779 are the input and output neurons, respectively. We consider the relationship between activities in adjacent  
 780 layers for ANNs given by

$$\mathbf{x}^l = \mathbf{w}^{l-1} f(\mathbf{x}^{l-1}), \quad (5)$$

781 and the energy function for EBNs described by

$$E^l = \frac{1}{2} \left( \mathbf{x}^l - \mathbf{w}^{l-1} f(\mathbf{x}^{l-1}) \right)^2. \quad (6)$$

782 This defines the ANNs to be the standard *multilayer perceptrons* (MLPs) and the EBNs to be the PCN.  
 783 In Eq. (6) and below,  $(\mathbf{v})^2$  denotes the inner product of vector  $\mathbf{v}$  with itself. The comparison between  
 784 backpropagation and prospective configuration in the main text is thus between the above MLPs and  
 785 PCNs. This choice is justified by that (1) they are the most standard models<sup>104</sup> and also (2) it is established  
 786 that they two are closely related<sup>25,33</sup> (i.e., they make the same prediction with the same weights and  
 787 input pattern), thus enabling a fair comparison. Nevertheless, we show that the theory (Extended Data  
 788 Figs. 5) and empirical comparison (Extended Data Figs. 6 and 7) between backpropagation and prospective  
 789 configuration generalize to other choices of network structures and energy functions, i.e., other EBNs and  
 790 ANNs, such as *GeneRec*<sup>105</sup> and *Almeida-Pineda*<sup>106–108</sup>.

791 Putting Eqs. (5) and (6) into the general framework, we can obtain the equations that describe MLPs  
 792 and PCNs, respectively. Assume the input and target patterns are  $\mathbf{s}^{\text{in}}$  and  $\mathbf{s}^{\text{target}}$ , respectively. Prediction  
 793 with MLPs is:

$$\mathbf{x}^1 = \mathbf{s}^{\text{in}} \text{ and } \mathbf{x}^l = \mathbf{w}^{l-1} f(\mathbf{x}^{l-1}) \text{ for } l > 1, \quad (7)$$

794 where  $\mathbf{x}^{L+1}$  is the prediction. Training MLPs with backpropagation is described by:

$$\Delta \mathbf{w}^l = -\alpha \frac{\partial L}{\partial \mathbf{w}^l} = -\alpha \frac{\partial L}{\partial \mathbf{x}^{L+1}} \cdot \frac{\partial \mathbf{x}^{L+1}}{\partial \mathbf{x}^L} \dots \frac{\partial \mathbf{x}^{L+1}}{\partial \mathbf{w}^l} \text{ where } L = \frac{1}{2} (\mathbf{x}^{L+1} - \mathbf{s}^{\text{target}})^2, \quad (8)$$

795 which backpropagates the error  $\frac{\partial L}{\partial \mathbf{x}^l}$  layer by layer from output neurons.

796 The neural dynamics of PCNs can be obtained using Eq. (2):

$$\Delta \mathbf{x}^l = -\gamma \frac{\partial E}{\partial \mathbf{x}^l} = -\gamma \frac{\partial (E^l + E^{l+1})}{\partial \mathbf{x}^l}. \quad (9)$$

797 Similarly, the weight dynamics of PCNs can be found:

$$\Delta \mathbf{w}^l = -\alpha \frac{\partial E}{\partial \mathbf{w}^l} = -\alpha \frac{\partial E^{l+1}}{\partial \mathbf{w}^l}. \quad (10)$$

798 To reveal the neural implementation of PCN, we define the prediction errors to be

$$\boldsymbol{\varepsilon}^l = \mathbf{x}^l - \mathbf{w}^{l-1} f(\mathbf{x}^{l-1}). \quad (11)$$

799 The neural and weight dynamics of PCN can be expressed (by evaluating derivatives in Eqs. (9) and (10)):

$$\Delta \mathbf{x}^l = -\gamma \boldsymbol{\varepsilon}^l + f'(\mathbf{x}^l) \circ (\mathbf{w}^l)^T \boldsymbol{\varepsilon}^{l+1} \quad (12)$$

800

$$\Delta \mathbf{w}^l = \alpha \boldsymbol{\varepsilon}^{l+1} \left( f(\mathbf{x}^l) \right)^T, \quad (13)$$

801 where the symbol  $\circ$  denotes element-wise multiplication. Assuming that  $\boldsymbol{\varepsilon}^l$  and  $\mathbf{x}^l$  are encoded in the  
 802 activity of error and value neurons, respectively, Eqs. (11) and (12) can be realized with the neural  
 803 implementation in Fig. 2c bottom. Particularly, error  $\boldsymbol{\varepsilon}$  and value  $\mathbf{x}$  neurons are represented by red and blue  
 804 nodes, respectively; excitatory + and inhibitory - connections are represented by connections with solid  
 805 and hollow nodes, respectively. Thus, Eqs. (11) and (12) are implemented with red and blue connections,  
 806 respectively. It should also be noticed that the weight dynamics is also realized locally: weight change  
 807 described by Eq. (13) corresponds to simple Hebbian plasticity<sup>109</sup> in the neural implementation of Fig. 2c  
 808 bottom, i.e., the change in a weight is proportional to the product of activity of pre-synaptic and post-  
 809 synaptic neurons. Thus, a PCN, as an EBN, can be implemented with local circuits only, due to the local  
 810 nature of energy terms (as argued earlier in this section).

811 Full algorithm of PCN is summarized in Algorithm 1. In all simulations in this paper (unless stated  
 812 otherwise), the integration step of the neural dynamics (i.e., relaxation) is set to  $\gamma = 0.1$ , and the relaxation  
 813 is performed for 128 steps ( $\mathcal{T}$  in Algorithm 1). During the relaxation, if the overall energy is not  
 814 decreased from the last step, the integration step is reduced by 50%; if the integration step is reduced two  
 815 times (i.e., reaching 0.025), the relaxation is terminated early. By monitoring the number of relaxation  
 816 steps performed, we notice that in most of the tasks we performed, the relaxation is terminated early at  
 817 around 60 iterations.

---

**Algorithm 1:** Learn with *predictive coding network*<sup>25,40,52</sup> (PCN)

---

**Input:** input pattern  $\mathbf{s}^{\text{in}}$ ; target pattern  $\mathbf{s}^{\text{target}}$ ; synaptic weights  $\{\mathbf{w}^1, \mathbf{w}^2, \dots, \mathbf{w}^L\}$   
**Output:** updated synaptic weights  $\{\mathbf{w}^1, \mathbf{w}^2, \dots, \mathbf{w}^L\}$

```

1  $\mathbf{x}^1 = \mathbf{s}^{\text{in}}$ ; // Clamp input neurons to input pattern
2  $\mathbf{x}^{L+1} = \mathbf{s}^{\text{target}}$ ; // Clamp output neurons to target pattern
3 for  $l = 2; l < L + 1; l = l + 1$  do // Initialize  $\mathbf{x}$ 
4 |  $\mathbf{x}^l = \mathbf{0}$ ;
5 end
6 for  $t = 0; t < \mathcal{T}; t = t + 1$  do // Relaxation
7 | for  $l = 1; l < L + 1; l = l + 1$  do
8 | |  $\boldsymbol{\varepsilon}^{l+1} = \mathbf{x}^{l+1} - \mathbf{w}^l f(\mathbf{x}^l)$ ; // according to Eq. (11)
9 | end
10 | for  $l = 2; l < L + 1; l = l + 1$  do
11 | |  $\Delta \mathbf{x}^l = \gamma \left( -\boldsymbol{\varepsilon}^l + f'(\mathbf{x}^l) \circ \left( (\mathbf{w}^l)^T \boldsymbol{\varepsilon}^{l+1} \right) \right)$ ; // according to Eq. (12)
12 | |  $\mathbf{x}^l = \mathbf{x}^l + \Delta \mathbf{x}^l$ ;
13 | end
14 end
15 for  $l = 1; l < L + 1; l = l + 1$  do // Update weights
16 |  $\Delta \mathbf{w}^l = \alpha \boldsymbol{\varepsilon}^{l+1} (f(\mathbf{x}^l))^T$ ;
17 |  $\mathbf{w}^l = \mathbf{w}^l + \Delta \mathbf{w}^l$ ;
18 end

```

---

818

819 In the Extended Data, we also investigate other choices of network structures and energy functions,  
820 resulting in other ANNs and EBNs. Overall, the EBNs investigated include PCNs<sup>25,40,52</sup>, target-PCNs,  
821 and *GeneRec*<sup>105</sup>, and the ANNs investigated include backpropagation and *Almeida-Pineda*<sup>106–108</sup>. Details  
822 of all the models can be found in corresponding previous work, and are also given in the Supplementary  
823 Materials (Supplementary Information) 2.1.

824 **Interference and measuring interference (i.e., target alignment) (Fig. 3)**

825 In Fig. 3a, since it simulates the example in Fig. 1, structure of the network is 1-1-2; weights are all  
826 initialized to 1; input pattern is [1] and target pattern is [0, 1]. Learning rates of both learning rules are  
827 0.2, and the weights are updated for 24 iterations. Fig. 3d repeats the same experiment as Fig. 3a but with  
828 learning rate searched from (0.005, 0.01, 0.05, 0.1), which is wide enough to cover essentially all learning  
829 rates used to train deep neural networks in practice.

830 In Fig. 3e, there are 64 neurons in each layer (including input and output layers) for each network;  
831 weights are initialized via standard Xavier uniform initialization<sup>110</sup>. No activation function is used, i.e.,  
832 linear networks are investigated. Depths of networks ( $L$ ) are searched from  $\{1, 2, 4, 6, 8, 10, 12, 14, 15\}$ ,  
833 as reported on the x-axis. Input and target patterns are a pair of randomly generated patterns of mean 0  
834 and standard deviation 1. Learning rates of both learning rules are 0.001. Weights are updated for one  
835 iteration and target alignment is measured for this iteration for each of the 64 datapoints, then averaged  
836 over the 64 datapoints to produce the reported target alignment value. The whole experiment is repeated 3  
837 times and the error bars report the standard error.

838 Simulations in Fig. 3f–h follow the setup of experiments in Fig. 4a–h, thus, are described at the end of  
839 the next section.

## 840 **Biologically relevant tasks (Fig. 4)**

841 In supervised learning simulations, fully connected networks in Fig. 4a–h are trained and tested on  
842 FashionMNIST<sup>56</sup>, and convolutional neural networks<sup>64</sup> (i–j) are trained and tested on CIFAR-10<sup>65</sup>. With  
843 FashionMNIST, models are trained to perform classification of gray-scaled fashion item images into 10  
844 categories such as trousers, pullovers and dresses. FashionMNIST is chosen because it is of moderate  
845 and appropriate difficulty for multi-layer non-linear deep neural networks, so that the comparisons with  
846 EBNs are informative. Classification of data in CIFAR-10 is more difficult, as it contains colored natural  
847 images belonging to categories such as cars, birds and cats, thus only evaluated with convolutional neural  
848 networks. Both datasets consist of 60000 training examples (i.e., training set) and 10000 test examples  
849 (i.e., test set).

850 The experiments in Fig. 4a–h follow the configurations below, except for the parameters investigated  
851 in specific panels (such as batch size, size of the dataset, and size of the architecture), which are adjusted  
852 as stated in the description of specific experiments. The neural network is composed of 4 layers and 32  
853 hidden neurons in each hidden layer. Note that the state-of-the-art MLP models of FashionMNIST are  
854 all quite large<sup>111</sup>. However, they are highly overparameterized, and thus, are not suitable to base our  
855 comparison on, because the accuracy reaches more than 95% regardless of the learning rule, due to the  
856 overparameterization. Thus, there is no space for demonstrating any meaningful comparison in these  
857 state-of-the-art overparameterized models. Overall, the size of the model on FashionMNIST demonstrated  
858 in this paper is a reasonable choice, with baseline models reaching reasonable performance ( $\sim 0.12$  test  
859 error for standard machine learning setup) while keeping enough room for demonstrating performance  
860 difference in different learning rules. The size of the input layer is  $28 \times 28$  for FashionMNIST<sup>56</sup> gray-  
861 scaled. The size of the output layer is 10, as the number of classes for both datasets. The weights are  
862 initialized from a normal distribution with mean 0 and standard deviation  $\sqrt{\frac{2}{n^l+n^{l+1}}}$ , where  $n^l$  and  $n^{l+1}$  are  
863 the number of neurons of the layer before and after the weight, respectively. This initialization is known  
864 as Xavier normal initialization<sup>110</sup>. The activation function  $f()$  is *Sigmoid*. We define one *iteration* as  
865 updating the weights for one step based on a mini-batch. The number of examples in a mini-batch, called  
866 the batch-size, is by default 32. One *epoch* comprises presenting the entire training set, split over multiple  
867 mini-batches. At the end of each epoch, the model is tested on the test set and the classification error is  
868 recorded as the “test error” of this epoch. The neural network is trained for 64 epochs; thus, ending up  
869 with 64 test errors. The mean of the test error over epochs, i.e., during training progress, is an indicator of  
870 how fast the model learns. The minimum of the test errors over epochs is an indicator of how well the  
871 model can learn, ignoring the possibility of over-fitting due to training for too long. Learning rates are  
872 searched independently for each configuration and each model. Each experiment is repeated 10 times  
873 (unless stated otherwise), and the error bars represent standard error.

874 We now describe settings specific to individual experiments. In Fig. 4b different batch sizes are tested  
875 (as shown on x-axis). In Fig. 4c the batch size is set to 1. In continual learning of Fig. 4d, training  
876 alternates between two tasks. Task 1 is classifying five randomly selected classes in a dataset, and task 2  
877 is classifying the remaining five classes. The whole network is shared by the two tasks, thus, differently  
878 from the network used in other panels, the network only has 5 output neurons. This better corresponds to  
879 continual learning with multiple tasks in nature, because, for example, if humans learn to perform two  
880 different tasks, they typically use the one brain and one pair of hands (i.e., the whole network is shared),  
881 since they do not have two different pairs of hands (i.e., humans share the output layers across tasks).  
882 Task 1 is trained for 4 iterations and then task 2 is trained for 4 iterations, and the training continues until  
883 total of 84 iterations is reached. After each iteration, error on the test set of each task is measured, as  
884 “test error”. In Fig. 4e, the mean of test error of both tasks during training of Fig. 4d at different learning

885 rates is reported. In Figs. 4f–g investigating concept drifting<sup>63,112,113</sup>, changes to class labels are made  
 886 every 512 epochs, and the models are trained for 4096 epochs in total. Thus, every 512 epochs, 5 out of  
 887 10 output neurons are selected, and the mapping from these 5 output neurons to the semantic meaning is  
 888 pseudo-randomly shuffled. In Fig. 4h different numbers of data points per class (data points per class) are  
 889 included into the training set (subsets are randomly selected according to different seeds).

890 In Fig. 4i, we train a convolutional network with prospective configuration and backpropagation,  
 891 with the structure detailed in Fig. 4j. For each learning rule, we independently searched 7 learning rates  
 892 ranging from  $\{0.0005, 0.00025, 0.0001, 0.000075, 0.00005, 0.000025, 0.00001\}$ . Both learning rules are  
 893 trained for 80 epochs, with batch size 200. Weight decay of 0.01 is applied for both learning rules. Each  
 894 configuration (each learning rule and each learning rate) are repeated for three times with different seeds.

895 To extend PCN to a convolutional neural network (or to any network with layered structure<sup>34,100</sup>),  
 896 we can define the forward function of a layer (i.e., how input of layer  $l + 1$  is computed from the  
 897 neural activity of layer  $l$ ) with weights  $\mathbf{w}^l$  to be  $\mathcal{F}_{\mathbf{w}^l}(\mathbf{x}^l)$ . For example, for the MLPs described above,  
 898  $\mathcal{F}_{\mathbf{w}^l}(\mathbf{x}^l) = \mathbf{w}^l f(\mathbf{x}^l)$ . For convolutional network  $\mathcal{F}_{\mathbf{w}^l}(\mathbf{x}^l)$  is a more complex function of  $\mathbf{w}^l$  and  $\mathbf{x}^l$ , and  
 899 also  $\mathbf{w}^l$  and  $\mathbf{x}^l$  are not simple matrix and vector anymore (to be defined later). Defining an ANN with  
 900  $\mathcal{F}(\cdot)$  would be (i.e., Eq. (5) becomes):  $\mathbf{x}^l = \mathcal{F}_{\mathbf{w}^{l-1}}(\mathbf{x}^{l-1})$ . Defining energy function of PCN with  $\mathcal{F}(\cdot)$   
 901 would be (i.e., Eq. (6) becomes):  $E^l = \frac{1}{2}(\mathbf{x}^l - \mathcal{F}_{\mathbf{w}^{l-1}}(\mathbf{x}^{l-1}))^2$ . Thus, neural and weight dynamic would  
 902 be (i.e., Eqs. (12) and (13) become):  $\Delta \mathbf{x}^l = -\gamma \boldsymbol{\epsilon}^l + \frac{\partial \mathcal{F}_{\mathbf{w}^l}(\mathbf{x}^l)}{\partial \mathbf{x}^l} \boldsymbol{\epsilon}^{l+1}$  and  $\Delta \mathbf{w}^l = \alpha \boldsymbol{\epsilon}^{l+1} \frac{\partial \mathcal{F}_{\mathbf{w}^l}(\mathbf{x}^l)}{\partial \mathbf{w}^l}$ , respectively.

903 As  $\mathcal{F}_{\mathbf{w}^l}(\mathbf{x}^l)$  is defined,  $\frac{\partial \mathcal{F}_{\mathbf{w}^l}(\mathbf{x}^l)}{\partial \mathbf{x}^l}$  and  $\frac{\partial \mathcal{F}_{\mathbf{w}^l}(\mathbf{x}^l)}{\partial \mathbf{w}^l}$  are obtained via auto differentiation in PyTorch ([https://pytorch.org/tutorials/beginner/basics/autogradqs\\_tutorial.html](https://pytorch.org/tutorials/beginner/basics/autogradqs_tutorial.html)). Thus,  
 904 training a convolutional PCN is as simple as replacing Lines 11 and 16 in Algorithm 1 with the above  
 905 corresponding equations.  
 906

907 In the following, we define  $\mathcal{F}_{\mathbf{w}^l}(\mathbf{x}^l)$  for convolutional networks. First,  $\mathbf{x}^l \in \mathbb{R}^{c_l \times h_l \times w_l}$ , where  $c_l$ ,  $h_l$   
 908 and  $w_l$  are number of features, height and width of the feature map. These numbers for each layer are  
 909 presented in Fig. 4j in the format of:  $c_l @ h_l \times w_l$ . For example, for the first layer (input layer), the shape is  
 910  $3 @ 32 \times 32$  as it is  $32 \times 32$  colored images, i.e., with three feature maps representing red, green and blue.  
 911 We denote kernel size, stride and padding of this layer as  $k_l$ ,  $s_l$  and  $p_l$ , respectively. These numbers for  
 912 each layer are presented in Fig. 4j. Thus,  $\mathbf{w}^l \in \mathbb{R}^{c_{l+1} \times c_l \times k_l \times k_l}$ . Finally,  $\mathbf{x}^{l+1}$  is obtained via:

$$\mathbf{x}^{l+1}[c, x, y] = f\left(\mathbf{x}^l[:, xs_l - p_l : xs_l - p_l + k_l, ys_l - p_l : ys_l - p_l + k_l]\right) \cdot \mathbf{w}^l[c, :, :, :], \quad (14)$$

913 where  $[a, b, \dots]$  means indexing the tensor along each dimension,  $:$  means all indexes at that dimension,  
 914  $a : b$  means slice of that dimension from index  $a$  to  $b - 1$ , and  $\cdot$  is dot product. In the above equation, if the  
 915 slicing of  $\mathbf{x}^l$  on the second and third dimensions, i.e.,  $\mathbf{x}^l[:, xs_l - p_l : xs_l - p_l + k_l, ys_l - p_l : ys_l - p_l + k_l]$  is  
 916 outside its defined range  $\mathbb{R}^{c_l \times h_l \times w_l}$ , the entries outside range are considered to be zeros, known as padding  
 917 mode of *zeros*.

918 In Fig. 3f, networks of 15 layers are trained and tested on FashionMNIST<sup>56</sup> dataset. Learning rates in  
 919 this Fig. 3f are optimized independently by a grid search over (5.0, 1.0, 0.5, 0.1, 0.05, 0.01, 0.005, 0.001,  
 920 0.0005, 0.0001, 0.00005, 0.00001, 0.000005) for each learning rule, as shown Fig. 3g, i.e., each learning  
 921 rule in Fig. 3f uses the learning rate that gives minimal point in the corresponding curve in Fig. 3g. Fig. 3h  
 922 investigates other network depths ( $\{1, 2, 4, 6, 8, 10, 12, 14, 15\}$ ) in the same setup. Similarly as Fig. 3f, the  
 923 learning rate for each learning rule and each “number of layers” is the optimal value (in terms of mean of  
 924 test error as the y axis of the figure) independently searched from (5.0, 1.0, 0.5, 0.1, 0.05, 0.01, 0.005,  
 925 0.001, 0.0005, 0.0001, 0.00005, 0.00001, 0.000005). Hidden layers are always of size 64 in the above  
 926 experiments. In the above experiment, only part of the training set was used (60 datapoints per class) so

927 that the test error is evaluated more frequently to reflect the difference on efficiency of the investigated  
928 learning rules. The activation function  $f()$  used is *LeakyReLU*, instead of the standard Sigmoid, because  
929 Sigmoid results in difficulty in training deep neural networks. Other unmentioned details follows the  
930 defaults as described above.

931 In the reinforcement learning experiments (Fig. 4k), we evaluate performance on three classic rein-  
932 forcement learning problems: Acrobot<sup>114,115</sup>, MountainCar<sup>116</sup>, and CartPole<sup>117</sup>. We interact with these  
933 environments via a unified interface by OpenAI Gym<sup>118</sup>. The observations  $s_t$  of these environments are  
934 vectors describing the status of the system, such as velocities and positions of different moving parts (for  
935 details refer to the original articles or documentation from OpenAI Gym). Each entry of the observation  $s_t$   
936 is normalized to mean 0 and standard deviation 1 via Welford’s online algorithm<sup>119,120</sup>. The action space  
937 of these environments is discrete. Thus, we can have a network taking in observation  $s_t$  and predicting the  
938 value ( $Q$ ) of each action  $a_t$  with different output neurons. Such a network is known as an action-value  
939 network, in short, a  $Q$  network. In our experiment, the  $Q$  network contains two hidden layers, each of  
940 which contains 64 neurons, initialized the same way as the network used for supervised learning, described  
941 before. One can acquire the value of an action  $a_t$  at a given observation  $s_t$  by feeding in  $s_t$  to the  $Q$  network  
942 and reading out the prediction on the output neuron corresponds to the action  $a_t$ , such value is denoted  
943 by  $Q(s_t, a_t)$ . The training of  $Q$  is a simple regression problem to target  $\hat{R}_t$ , obtained via  $Q$ -learning with  
944 experience replay (summarized in Algorithm 2). Considering  $s_t$  to be  $\mathbf{s}^{\text{in}}$  and  $\hat{R}_t$  to be  $\mathbf{s}^{\text{target}}$ , the  $Q$  network  
945 can be trained with prospective configuration or backpropagation. Note that  $\hat{R}_t$  is the target of the selected  
946 action  $a_t$  (i.e., the target of one of the output neurons corresponds to the selected action  $a_t$ ), thus,  $\hat{R}_t$  is in  
947 practice considered to be  $\mathbf{s}^{\text{target}}[a_t]$ . For prospective configuration, it means the rest of the output neurons  
948 except the one corresponding to  $a_t$  are freed; for backpropagation, it means the error on these neurons are  
949 masked out.

950 PCN of slightly different settings from the defaults is used for prospective configuration: the integration  
951 step is fixed to be half of the default (=0.05), and relaxation is performed for a fixed and smaller number  
952 of steps (=32). This change is introduced because  $Q$ -learning is more unstable (so smaller integration  
953 step) and more expensive (so smaller number of relaxation steps) than supervised learning tasks. To  
954 produce a smoother curve of “Sum of rewards per episode” in Fig. 4k from the *SumRewardPerEpisode*  
955 in Algorithm 2, the *SumRewardPerEpisode* curve along *TrainingEpisode* are averaged with a sliding  
956 window of length 200. Each experiment is repeated with 3 random seeds and the shadows represents  
957 standard error across them. Learning rates are searched independently for each environment and each  
958 model from the range  $\{0.05, 0.01, 0.005, 0.001, 0.0005, 0.0001\}$ ; and the results reported in Fig. 4k are  
959 for the learning rates yielding the highest mean of “Sum of rewards per episode” over training episodes.

---

**Algorithm 2:** *Q*-learning with experience replay.

---

**Input:** Action-value network  $Q$ .

**Result:** Trained action-value network  $Q$ .

```
1 Initialize experience replay  $\mathcal{R}$  of capacity 50000;
2 for  $TrainingEpisode = 0$ ;  $TrainingEpisode < 10000$ ;  $TrainingEpisode = TrainingEpisode + 1$ 
  do
3    $\rho = \max(0.01, 0.08 - 0.01 * (TrainingEpisode/200))$ ; // Anneal probability of exploring
4   Get initial observation  $s_t$  and set episode termination signal  $d_t = False$ ;
5   Initialize  $SumRewardPerEpisode = 0$ ;
6   while  $! d_t$  do // Collect experience
7     With probability  $\rho$  sample a random action  $a_t$ , otherwise select  $a_t = \arg \max_a Q(s_t, a)$ ;
8     Execute  $a_t$ , observe reward  $r_t$ , new observation  $r_{t+1}$  and  $d_t$ ;
9     Accumulate  $SumRewardPerEpisode += r_t$ ;
10    Store transition  $(s_t, a_t, r_t, s_{t+1}, d_t)$  in  $\mathcal{R}$ ;
11    Set  $s_t = s_{t+1}$ ;
12  end
13  if  $length(\mathcal{R}) > 2000$  then // Replay and train
14    for  $epoch = 0$ ;  $epoch < 10$ ;  $epoch = epoch + 1$  do
15      Sample random minibatch (size=60) of  $(s_t, a_t, r_t, s_{t+1}, d_t)$  from  $\mathcal{R}$ ;
16       $\hat{R}_t = \begin{cases} r_t, & \text{if } d_t == True \\ r_t + 0.98 \max_a Q(s_{t+1}, a), & \text{otherwise} \end{cases}$ ;
17      Set  $s^{in} = s_t$ ;
18      Set  $s^{target}[a_t] = \hat{R}_t$ ;
19      Train  $Q$  with  $s^{in}$  and  $s^{target}[a_t]$  with prospective configuration or backpropagation;
20    end
21  end
22  Report  $SumRewardPerEpisode$ ;
23 end
```

---

960

### 961 Simulation of motor learning (Fig. 5)

962 As shown in Fig. 5, we train a network that includes 2 input, 2 hidden, and 2 output neurons. The two  
963 input neurons are one-to-one connected to the two hidden neurons, and the two hidden neurons are fully  
964 connected to the two output neurons. The two input neurons are considered to encode presenting the  
965 blue and red background, respectively. The two output neurons are considered to encode the prediction  
966 of the perturbations towards positive and negative directions, respectively. Presenting or not presenting  
967 a background color are encoded as 1 and 0 respectively; presenting or not presenting perturbations of  
968 a particular direction are encoded as 1 and 0, respectively. The weights are initialized from a normal  
969 distribution with mean 0 and standard deviation fitted to behavioural data (see below), simulating that the  
970 participants have not built any associations before the experiments. Learning rates are independent for  
971 the two layers, as we expect the connections from perception to belief and the connections from belief to  
972 predictions to have different degree of plasticity. The two learning rates are also fitted to the data (see  
973 below).

974 The number of participants, training and testing trials follow exactly the human experiment<sup>74</sup>. In  
975 particular, for each of 24 simulated participants, the weights are initialized with a different seed of the  
976 random number generator. They each experience two stages: training and testing. Note that the pre-training

977 stage performed in the human experiment is not simulated here as its goal was to make human participants  
978 familiar with the setup and devices.

979 In the training stage, the model experiences 24 blocks of trials. In each block, the model is presented  
980 with the following sequence of trials, matching the original experiment<sup>74</sup>.

- 981 • The model is trained with two trials without perturbation: B0 and R0, with order counterbalanced  
982 across consecutive blocks. Note that in the human experiment there were two trial types without  
983 perturbations (channel and washout trials), but they are simulated in the same way here as B0 or R0  
984 trials, because they both did not include any perturbations.
- 985 • The model is trained with 32 trials with perturbations, where there are equal number of B+ and R-  
986 within each 8 trials in a pseudorandom order.
- 987 • The model experiences two trials: B0 and R0, with order counterbalanced across consecutive blocks.
- 988 • The model experiences  $n \leftarrow \{14, 16, 18\}$  washout trials (equal number of B0 and R0 trials in a  
989 pseudorandom order), where  $n \leftarrow \{a, b, c\}$  denotes sampling without replacement from a set of  
990 values  $a$ ,  $b$  and  $c$ , and replenishing the set whenever becomes empty.
- 991 • The model experiences one triplet, where the exposure trial is either B+ or R-, counterbalanced  
992 across consecutive blocks. Here, a triplet consists three sequential trials: B0, the specified exposure  
993 trial and again B0.
- 994 • The model experiences again  $n \leftarrow \{6, 8, 10\}$  washout trials (equal number of B0 and R0 trials in a  
995 pseudorandom order).
- 996 • The model experiences again one triplet, where the exposure trial is either B+ or R-, whichever was  
997 not used on the previous triplet.

998 Then, in the testing stage, the model experiences 8 repetitions of four blocks of trials. In each block,  
999 one of combinations B+, R+, B- and R- is tested. The order of the four blocks is shuffled in each of  
1000 the 8 repetitions. In each block, the model first experiences  $n \leftarrow \{2, 4, 6\}$  washout trials (equal number  
1001 of B0 and R0 trials in a pseudorandom order). Then the model experiences a triplet of trials, where  
1002 the exposure trial is the combination (B+, R+, B- or R-) tested in a given block, to assess single trial  
1003 learning of this combination. The change in adaption in the model is computed as the absolute value  
1004 of the difference in the predictions of perturbations on the two B0 trials in the above triplet, where the  
1005 prediction of perturbation is computed as the difference between the activities of the two output neurons.  
1006 The predictions are averaged over participants and the above repetitions.

1007 The parameters of each learning rule are chosen such that the model best reproduces the change in  
1008 adaptation shown in Fig 5f. In particular, we minimize the sum over set  $C$  of the 4 exposure trial types of  
1009 the squared difference between average change in adaptation in experiment ( $d_c$ ) and in the model ( $x_c$ ):

$$\sum_{c \in C} (ax_c - d_c)^2 \quad (15)$$

1010 The model predictions are additionally scaled by a coefficient  $a$  fitted to the data, because the behavioural  
1011 data and model outputs have different scales. Exhaustive search was performed over model parameters:  
1012 standard deviation of initial weights could take values from  $\{0.01, 0.05, 0.1\}$ , and two learning rates for  
1013 two layers could take values from  $\{0.00005, 0.0001, 0.0005, 0.01, 0.05\}$ . Then, for each learning rule and  
1014 each combination of the above model parameters, the coefficient  $a$  is resolved analytically (restricted to be  
1015 positive) to minimize the sum of the squared errors of Eq. (15).

## 1016 **Simulation of fear conditioning (Fig. 6)**

1017 As shown in Fig. 6c, the simulated network includes 2 input, 2 hidden, and 1 output neurons. The weights  
1018 are initialized from a normal distribution of mean 0 and standard deviation 0.01, reflecting that the animals



1019 have not built an association between stimulus and electric shock before the experiments. Presenting or not  
1020 presenting the stimulus (noise, light, or shock) is encoded as 1 and 0, respectively. The two input neurons  
1021 are considered to be the visual and auditory neurons; thus, their activity corresponds to perceiving light  
1022 and noise, respectively. The output neuron is considered to encode the prediction of the electric shock.  
1023 The training and extinction sessions are both simulated for 32 iterations with the learning rate of 0.01. In  
1024 the test session, the model makes a prediction with the presented stimulus (noise only). As in the previous  
1025 section, we denote by  $x_c$  the prediction for each group  $c$  from a set  $C = \{N+, LN+, LN+L-\}$ . To map  
1026 the prediction to the percentage of freezing, it is scaled by a coefficient  $a$  (as the neural activity and the  
1027 measure of freezing have different units) and shifted by a bias  $b$  (as the rats may have some tendency to  
1028 freeze after salient stimuli even if they had not been associated with a shock). The numbers reported in  
1029 Fig. 6b are these scaled predictions. The coefficient  $a$  (constrained to be positive) and bias  $b$  are optimized  
1030 for prospective configuration and backpropagation independently, analogously as described in the previous  
1031 section, i.e. their values that minimize summed squared error given below are found analytically.

$$\sum_{c \in C} (ax_c + b - d_c)^2 \quad (16)$$

### 1032 **Simulation of human reinforcement learning (Fig. 7)**

1033 As shown in Fig. 7b, we train a network that includes 1 input, 1 hidden, and 2 output neurons. The input  
1034 neuron is considered to encode being in the task, so it is set to 1 throughout the simulation. The two output  
1035 neurons encode the prediction of the value of the two choices. Reward and punishment are encoded as 1  
1036 and  $-1$ , respectively, because the participants were either winning or losing money. The model selects  
1037 actions stochastically based on the predicted value of the two choices (encoded in the activity of two  
1038 output neurons) according to the softmax rule (with temperature of 1). The weights are initialized from a  
1039 normal distribution of mean 0 and standard deviation fitted to experimental data (see below), simulating  
1040 that the human participants have not built any associations before the experiments. Number of simulated  
1041 participants (number of repetitions with different seeds) was set to 16 as in the human experiment<sup>74</sup>. The  
1042 number of trials is not mentioned in the original paper, so we simulate for 128 trials for both learning  
1043 rules.

1044 To compare the ability of the two learning rules to account for the pattern of signal from mPFC, for  
1045 each of the rules, we optimized the parameters describing how the model is set up and learns (the standard  
1046 deviation of initial weights and the learning rate). Namely, we searched for the values of these parameters  
1047 for which the model produces the most similar pattern of its output activity to that in the experiment.  
1048 In particular, we minimized the sum over set  $C$  of four trial types in Fig. 7c of the squared difference  
1049 between model predictions  $x_c$  and data  $d_c$  on mean mPFC signal (Eq. (16)). The model predictions are  
1050 additionally scaled by a coefficient  $a$  and offset by a bias  $b$ , because the fMRI signal had different units  
1051 and baseline than the model. To compute the model prediction for a given trial type, the activity of the  
1052 output neuron corresponding to the chosen option is averaged across all trials of this type in the entire  
1053 simulation. The scaled average activity from the model is plotted in Fig. 7c, where the error bars show the  
1054 standard error of the scaled activity. To fit the model to experimental data, the values of model parameters  
1055 and the coefficient were found analogously as described in the previous section. In particular, we employ  
1056 exhaustive grid search on the parameters. The models are simulated for all possible combinations of  
1057 standard deviation of initial weights, and the learning rate, from the following set:  $\{0.01, 0.05, 0.1\}$ . Then,  
1058 for each learning rule and each combination of the above model parameters, the coefficient  $a$  (restricted to  
1059 be positive) and the bias  $b$  are resolved analytically to minimize sum of the squared error of Eq. (16).

## 1060 **Data availability**

1061 Learning tasks analysed in Fig. 4a-j were built using the publicly available FashionMNIST<sup>56</sup> and CIFAR-  
1062 10<sup>65</sup> datasets. They are incorporated in most machine learning libraries, and their original releases  
1063 are available at <https://github.com/zalandoresearch/fashion-mnist> and <https://www.cs.toronto.edu/~kriz/cifar.html>, respectively. Reinforcement learning tasks analysed  
1064 in Fig. 4k were built using the publicly available simulators by OpenAI Gym<sup>118</sup>.  
1065

## 1066 **Code availability**

1067 Complete code and full documentation reproducing all simulation results will be made publicly available at  
1068 <https://github.com/YuhangSong/A-New-Perspective> upon publication of this work. It  
1069 will be released under GNU General Public License v3.0 without any additional restrictions (for license's  
1070 details see <https://opensource.org/licenses/GPL-3.0> by the open source initiative).

## 1071 **Acknowledgements**

1072 We thank Timothy Behrens for comments on the manuscript, and Andrew Saxe for discussions. Yuhang  
1073 Song was supported by the China Scholarship Council under the State Scholarship Fund and J.P. Morgan  
1074 AI Research Awards. Beren Millidge and Rafal Bogacz were supported by the the Biotechnology  
1075 and Biological Sciences Research Council grant BB/S006338/1 and Medical Research Council grant  
1076 MC\_UU\_00003/1. Thomas Lukasiewicz and Tommaso Salvatori were supported by the Alan Turing  
1077 Institute under the EPSRC grant EP/N510129/1 and by the AXA Research Fund. Zhenghua Xu was  
1078 supported by National Natural Science Foundation of China under the grant 61906063, by the Natural  
1079 Science Foundation of Hebei Province, China, under the grant F2021202064, by the Natural Science  
1080 Foundation of Tianjin City, China, under the grant 19JCQNJC00400, by the “100 Talents Plan” of Hebei  
1081 Province, China, under the grant E2019050017, and by the Yuanguang Scholar Fund of Hebei University  
1082 of Technology, China.

1083 **JPMORGAN CHASE & CO.** This research was funded in part by JPMorgan Chase & Co. Any views  
1084 or opinions expressed herein are solely those of the authors listed, and may differ from the views and  
1085 opinions expressed by JPMorgan Chase & Co. or its affiliates. This material is not a product of the  
1086 Research Department of J.P. Morgan Securities LLC. This material should not be construed as an individual  
1087 recommendation for any particular client and is not intended as a recommendation of particular securities,  
1088 financial instruments or strategies for a particular client. This material does not constitute a solicitation or  
1089 offer in any jurisdiction.

## 1090 **Author contributions**

1091 Y.S. and R.B. conceived the project. Y.S., R.B., B.M. and T.S. contributed ideas for experiments and  
1092 analysis. Y.S. and B.M. performed simulations. Y.S., B.M. and R.B. performed mathematical analyses.  
1093 Y.S., T.L. and R.B. managed the project. T.L. and Z.X. advised on the project. Y.S., R.B. and B.M. wrote  
1094 the paper. T.S., T.L. and Z.X. provided revisions to the paper.

## 1095 **Competing interests**

1096 The authors declare no competing interests.

1097 **Additional information**

1098 **Extended Data Figures/Tables** is available for this paper in the same file (Section 1).

1099 **Supplementary Information** is available for this paper in the same file (Section 2).

1100 **Correspondence and requests** for materials should be addressed to Y.S. and R.B.

1101

## 1 Extended Data

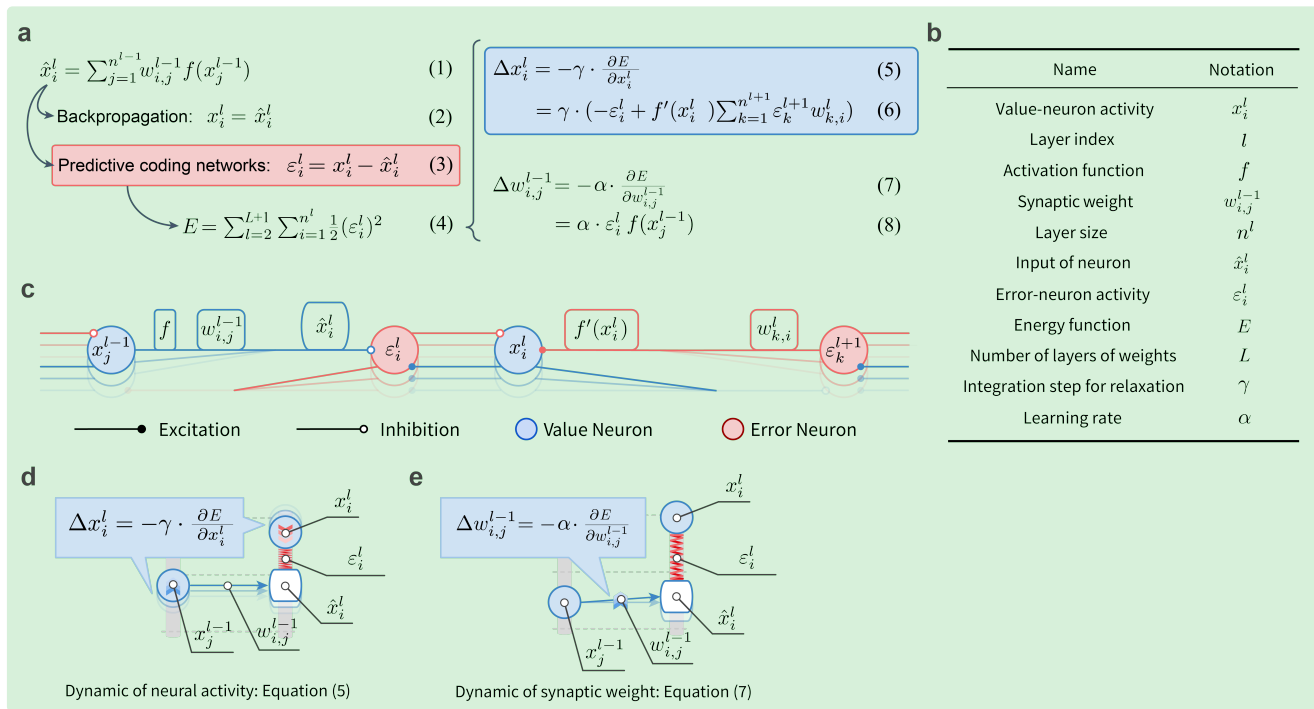

Extended Data Fig. 1

1102

**Predictive coding networks, neural implementation and corresponding energy machine.** The figure shows a list the equations describing the equilibrium-seeking dynamics and plasticity of predictive coding networks (panels a-b), how these equations map to a neural implementation, and how they map to the machine analog introduced in Fig. 2.

1106

► **a** | List of equations describing predictive coding networks. Eq. (1) in this figure describes the input to a given layer  $\hat{x}_i^l$  from the neuron in the previous layer  $x_j^{l-1}$ . In artificial neural networks trained with backpropagation, neural activities of a given layer  $x_i^l$  are set as the input to this layer  $\hat{x}_i^l$  (Eq. (2)). In contrast, in predictive coding networks, neural activities of this layer  $x_i^l$  are **not** set as the input to this layer  $\hat{x}_i^l$ , instead an error  $\varepsilon_i^l$  is defined between them (Eq. (3)). Additionally, predictive coding networks define the energy  $E$  of the network to be the sum of all the squared errors  $\frac{1}{2} (\varepsilon_i^l)^2$  (Eq. (4)). The dynamic of neural activity  $\Delta x_i^l$  in predictive coding networks is set to change the neural activity in proportion to the negative gradient of the energy with respect to the neural activity, so as to reduce the energy (Eq. (5)), which can be further derived as Eq. (6). The dynamic of synaptic weights  $\Delta w_{i,j}^{l-1}$  of predictive coding networks is set to be in proportion to the negative gradient of the energy with respect to the weight, so as to reduce the energy (Eq. (7)), which can be further derived as Eq. (8).

1117

► **b** | A list of symbols shared by all panels in the figure for easy reference.

1118

► **c** | Mapping of equations describing predictive coding networks in panel a to a neural implementation. The neural implementation includes value neurons (blue) performing computations in Eq. (6), and separate error neurons encoding prediction errors (red) performing computations in Eq. (3), where positive sign is encoded by excitatory connections while negative sign is encoded by the inhibitory connections. It should be noticed that the weight dynamics  $\Delta w_{i,j}^{l-1}$  is also realized locally: weight change described by Eq. (8). corresponds to simple Hebbian plasticity<sup>109</sup> in the architecture shown in panel a, i.e., the change

1123

1124 in a weight is proportional to the product of activity of pre-synaptic and post-synaptic neurons. Different  
1125 suggestions have been made on how this architecture could be realized in cortical circuits. An influential  
1126 study<sup>121</sup> has suggested that error and value neurons correspond to separate neurons, so in such architecture  
1127 the plasticity rule is precisely Hebbian, as explained above. Some other models<sup>22</sup> implementing predictive  
1128 coding networks<sup>32</sup> include an error compartment (in apical dendrite) and a value compartment (in soma)  
1129 within a single neuron. In such architecture the plasticity is still local as it depends on the product of  
1130 activity in one neurons and potential of the apical dendrite in the other neuron.

1131 ▶ **d-e** | Mapping of equations describing predictive coding networks in panel a to the machine analog  
1132 introduced in Fig. 2. The exact same set of equations describing predictive coding networks also describe  
1133 a physical machine connected with rods, nodes and springs. ▶ **d** | The dynamic of neural activity  $\Delta x_i^l$  of  
1134 predictive coding networks (Eq. (5)) describes relaxing the physical machine by moving the nodes. ▶ **e**  
1135 | The dynamic of synaptic weight  $\Delta w_{i,j}^{l-1}$  of predictive coding networks (Eq. (7)) describes relaxing the  
1136 physical machine by tuning the rods.

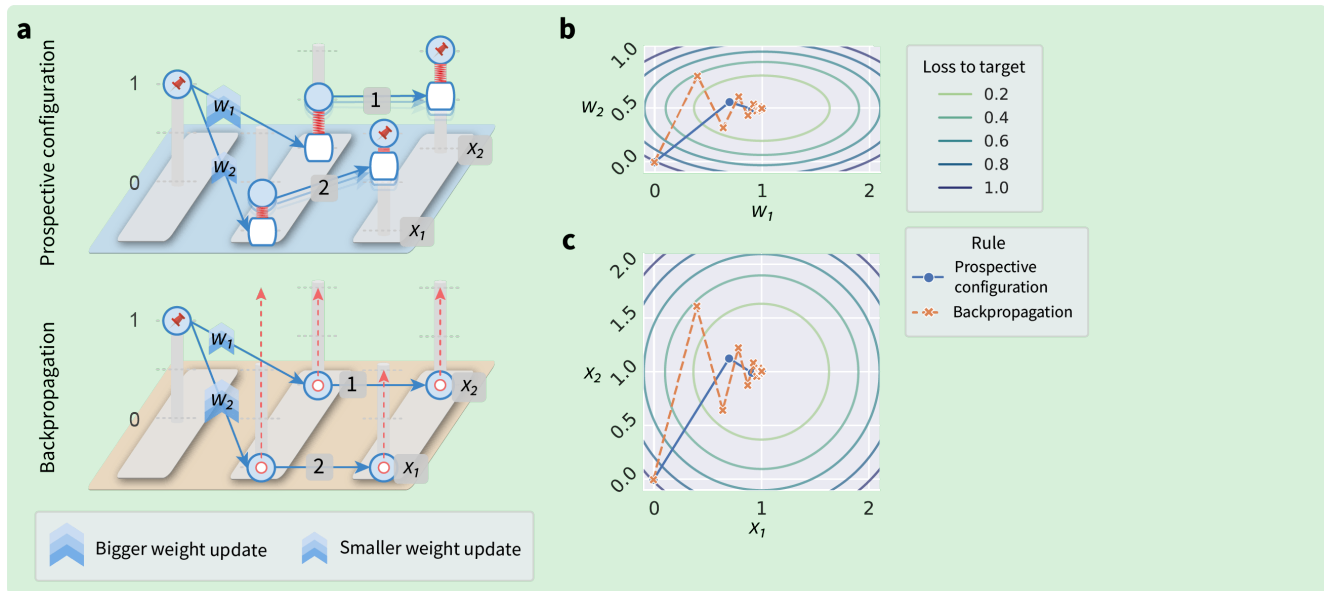

**Extended Data Fig. 2**

1137 **Differences in learning between prospective configuration and backpropagation.** This figure  
 1138 shows an example of a simple network revealing striking differences in how errors are propagated and  
 1139 weights modified by the two algorithms. For this network it is possible to explicitly visualize how learning  
 1140 changes weights and outputs, and explicitly show that although backpropagation follows the gradient of  
 1141 loss in the space of weights, it does not in the space of outputs.

1142 ▶ **a** | Setup of the example. In this example, we consider a network consisting of 1 input neuron, 2  
 1143 hidden neurons and 2 output neurons, with the structure shown with the energy machine. The input is  
 1144 always 1 and the target of both output neurons are both 1. The weights in the first layer are initialized to 0,  
 1145 while in the second layer to 1 (top) and 2 (bottom). We visualize with the energy machine how prospective  
 1146 configuration and backpropagation learn differently in this example. Prospective configuration assigns  
 1147 larger error to the top hidden neurons than the bottom, and hence would increase  $w_1$  more than  $w_2$ . By  
 1148 contrast, backpropagation does the opposite: since the backpropagated errors are scaled by the weights  
 1149 to output layer, the error for the bottom hidden neuron is higher than for the top. Importantly, in this  
 1150 learning problem, weight  $w_2$  does not need to be modified as much as  $w_1$ , because any changes in  $w_2$   
 1151 will be amplified by the high weight to the output neuron. Prospective configuration indeed modifies  $w_2$   
 1152 less than  $w_1$ , while backpropagation does the opposite. This suggests that backpropagation does not  
 1153 modify the weights optimally to move output toward the target, and we will illustrate it in the following panels.

1154 ▶ **b** | Landscape of the weights ( $w_1$  and  $w_2$ ). We consider a setup in which the network only learns  
 1155 the two weights on the first layer:  $w_1$  and  $w_2$ , while the weights in the second layer are fixed all the  
 1156 time during the training. This is so that the weight space is small (only two dimensional, so that we can  
 1157 visualize the landscape of weights); and we choose to learn the two weights in the first layer instead the  
 1158 second (last) layer so that the problem is not trivial. All the combinations of weights on the same contour  
 1159 line gives the same loss to the target (in short, loss), where we can see the combination of  $w_1 = 1$  and  
 1160  $w_2 = 0.5$  gives loss of 0. Assuming the weights ( $w_1, w_2$ ) start from  $(0, 0)$ , backpropagation (orange)  
 1161 takes steps following the direction orthogonal to the contour lines, i.e. the direction of local gradient descent.  
 1162 It is well-known that backpropagation cannot have more global vision of the minimal point of the landscape:  
 1163 thus, often forms the trajectory of learning as the orange curve, “bouncing” towards the global minimum  
 1164 point. Prospective configuration (blue), on the contrary, although does not follow gradient in the weight

1165 space (blue line is not orthogonal to the contour lines), it moves more directly to the global minimum  
1166 of the landscape. This is exactly due to the mechanism of prospective configuration giving the learning  
1167 rule a more global view of the system: as mentioned above, prospective configuration infers that since  
1168 the bottom weight of second layer is larger ( $= 2$ ) than the top one ( $= 1$ ), it only needs small error being  
1169 assigned to the bottom neuron of the hidden layer so as to correct the error on the bottom output.

1170 ► **c** | Landscape of the outputs ( $x_1$  and  $x_2$ ). The panel shows changes in output neurons' activity,  $x_1$   
1171 and  $x_2$ , resulting from the weight updates in panel b. As in panel b, the contour lines indicate the loss.  
1172 Comparing panels b and c reveals that changes of backpropagation (orange) are orthogonal to the loss  
1173 contour lines in weight space, but not in output neuron space; while changes of prospective configuration  
1174 (blue) are not orthogonal to loss contour lines in weight space, but are closer to being orthogonal in  
1175 output neuron space. Overall, the comparison reveals fundamental difference between backpropagation  
1176 and prospective configuration: backpropagation does local gradient decent in weight space (local means  
1177 it only sees the infinitely small area around it current state); while prospective configuration infers the  
1178 configuration of neuron activities that reduces the loss in the output space, thus, the trajectory in the weight  
1179 space is fundamentally different from that for backpropagation. This fundamental difference leads to  
1180 advantage of prospective configuration over backpropagation: it moves more directly towards the minimal  
1181 point in the weight space and output space, instead of “bouncing” towards it (as backpropagation does).  
1182 Learning rate in this panel is the same as the learning rate used in the corresponding learning rule in panel  
1183 b.

1184 **Implementation details.** Learning rate for backpropagation in this figure is set to  $\alpha = 0.4$ , while  
1185 that for prospective configuration is solved so that it produces the same magnitude of weight change  
1186 ( $\sqrt{\Delta w_1^2 + \Delta w_2^2}$ ) during the first iteration as backpropagation. Weights are updated for 15 iterations. Details  
1187 of the learning rules are described in the Methods section and also in Supplementary Information 2.1.

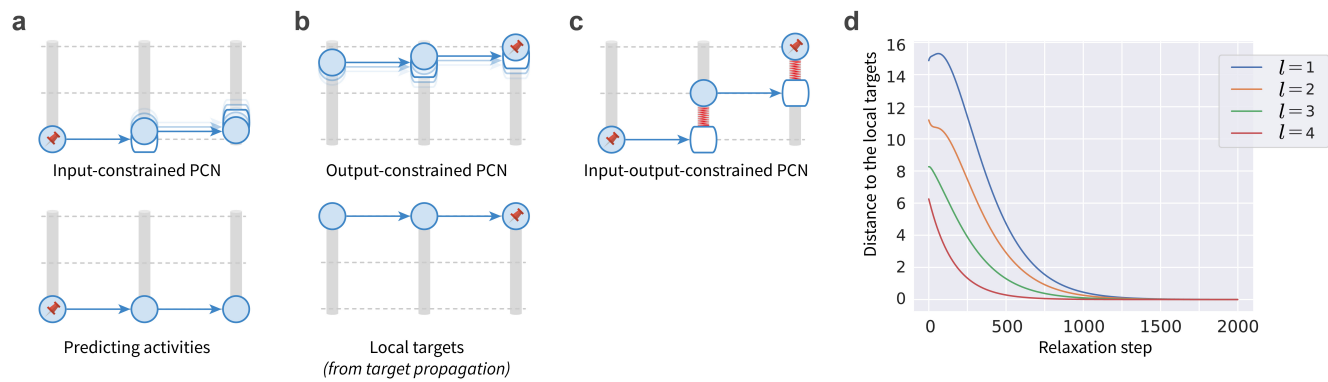

**Extended Data Fig. 3**

1188 **Relationship of prospective configuration to target propagation.** Prospective configuration is related  
 1189 to another influential algorithm of credit assignment — target propagation<sup>122</sup>. Since target propagation  
 1190 has target alignment equal to 1<sup>58</sup>, this relationship provides an explanation for the high target alignment  
 1191 of prospective configuration. Target propagation is an algorithm, which explicitly computes the neural  
 1192 activity in hidden layers required to produce the desired target pattern. We call these values local targets.  
 1193 We demonstrate that one of energy-based networks, predictive coding networks<sup>25,40,52</sup> (PCNs) tends  
 1194 to move the activity during relaxation towards these local targets. The relationship of PCNs to target  
 1195 propagation can be visualized with the proposed energy machine in Fig. 2, hence panels a–c illustrate how  
 1196 the neural activity in a PCN depends on whether inputs and outputs are constrained, and these properties  
 1197 are formally proved in Supplementary Information 2.2.

1198 ▶ **a** | With only input neurons constrained (and outputs unconstrained) PCNs can generate prediction  
 1199 about the output, and hence we refer to this pattern of neural activity as the predicting activity.

1200 ▶ **b** | With only output neurons constrained (and inputs unconstrained), the neural activity of PCNs  
 1201 relaxes to the local target from target propagation. This happens because with only outputs constrained,  
 1202 other nodes have a freedom to move to values that generate the outputs, and when the energy reduces to 0  
 1203 (as shown in the bottom display) all neurons must have the activity generating the target output.

1204 ▶ **c** | With both input and output neurons constrained, the neural activity of PCNs relaxes to the  
 1205 weighted sum of the local target from target propagation and the predicting activity. Note that the position  
 1206 of the hidden node is in between the positions from panels a and b.

1207 ▶ **d** | The distance between the neural activity to the local target at different layers along the relaxation  
 1208 progress in output-constrained PCNs. Here, the neural activity of the output-constrained PCNs converges  
 1209 to the local target, and the layers closer to the output layer (larger  $l$ ) converge to the local target earlier  
 1210 than the others, which is as expected from the physical intuition of the energy machine.

1211 **Implementation details.** We train the models to predict a target pattern from an input pattern (both  
 1212 randomly generated from  $\mathcal{N}(0, 1)$ , and the input and target patterns are of 5 and 1 entries, respectively).  
 1213 The structure of the networks is  $5 \rightarrow 5 \rightarrow 5 \rightarrow 5 \rightarrow 1$ . There is no activation function, i.e., it is a linear  
 1214 network. For the computation of the local target in target propagation, refer to the original paper<sup>122</sup>. The  
 1215 mean square difference is used to measure the distance to the local target.



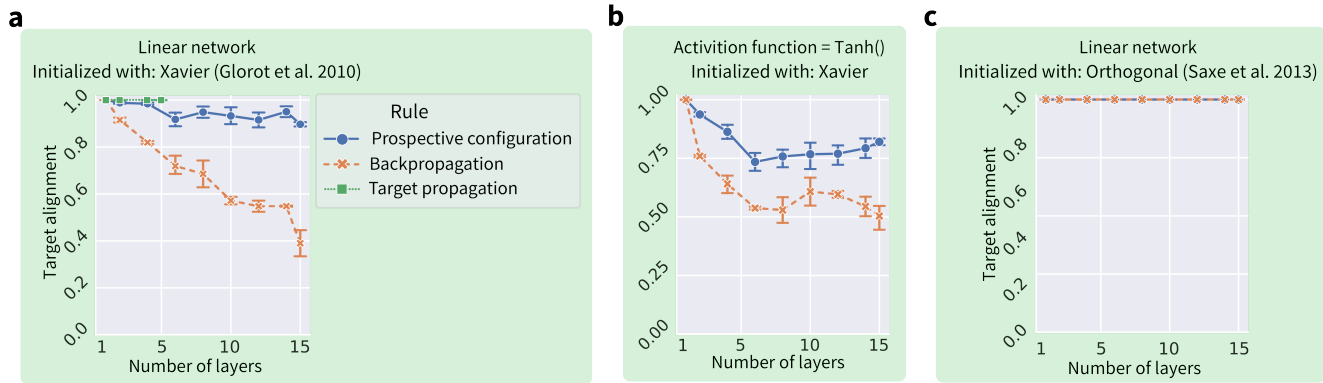

**Extended Data Fig. 4**

1216 **Target alignment in deep neural networks with different learning algorithms, non-linearities**  
 1217 **and initializations.** This figure extends the analyses from Fig. 3e in the main paper of target alignment in  
 1218 randomly generated networks with different depth.

1219 ▶ **a** | Target alignment for target propagation in deep linear network initialized with standard Xavier  
 1220 normal initialization<sup>110</sup>. For comparison, the results presented in Fig. 3e of the main paper for predictive  
 1221 coding networks and backpropagation are also shown. The results for target propagation are only shown  
 1222 for networks with up to 5 layers, because the algorithm became numerically unstable for deeper networks.  
 1223 The target alignment of target propagation is equal to 1 as implied by previous analytic work<sup>58</sup> (for details  
 1224 see section 2.4.2 of Supplementary Information).

1225 ▶ **b** | Target alignment for networks with a non-linear (*Tanh*) activation function, initialized with  
 1226 standard Xavier normal initialization<sup>110</sup>. The higher value of target alignment for predictive coding  
 1227 networks than backpropagation shown in panel a generalizes to networks with non-linearity.

1228 ▶ **c** | Target alignment of linear networks with orthogonal initialization (where weight in each  
 1229 layer satisfy  $(\mathbf{w}^l)^T \mathbf{w}^l = \mathbf{I}$ )<sup>123</sup>. Saxe et al.<sup>123</sup> discovered that with such initialization weights evolve  
 1230 independently of each other during learning, thus, learning times can be independent of depth, even for  
 1231 arbitrarily deep linear networks. As shown in the figure, interestingly, orthogonal initialization gives  
 1232 target alignment of 1 for both learning rules. We also demonstrated this analytically in section 2.4.3  
 1233 of Supplementary Information. This perfect target alignment can be intuitively expected, because the  
 1234 independence of weights mentioned above is related to a lack of interference, and it further illustrates that  
 1235 reduction in target alignment is caused by interference between weights.

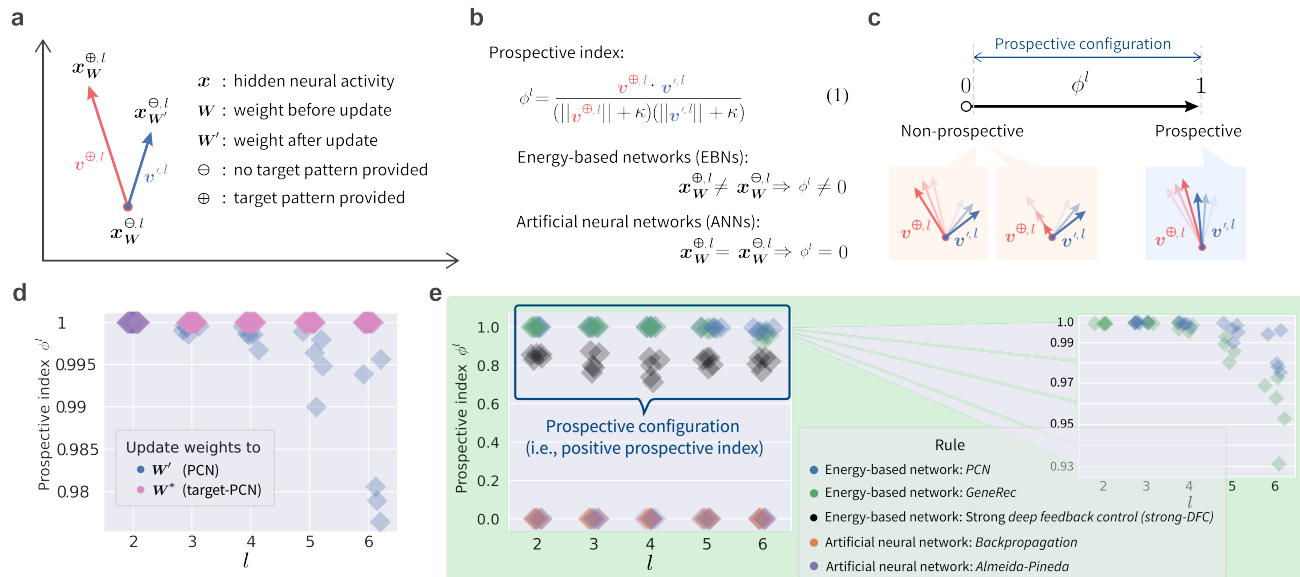

**Extended Data Fig. 5**

1236 **Formal definition of prospective configuration.** Formal definition of prospective configuration with  
 1237 prospective index (panels a–c), a metric that one can measure for any learning model. With this metric,  
 1238 we show that prospective configuration is present in different *energy-based networks* (EBNs), but not in  
 1239 *artificial neural networks* (ANNs) (panels d–e).

1240 ▶ **a** | To introduce the prospective index, we consider the hidden neural activity  $x^l$  in layer  $l$ , at three  
 1241 moments of time. First, a learning iteration starts from  $x^l$  under the current weights  $W$  without target  
 1242 pattern provided  $\ominus$ :  $x_W^{\ominus,l}$ . Second, a target pattern is provided  $\oplus$ , and neural activity settles to  $x_W^{\oplus,l}$ . Third,  
 1243  $W$  is updated to  $W'$ , the target pattern is removed  $\ominus$ , and the neural activity settles to  $x_W^{\ominus,l}$ . We define two  
 1244 vectors  $v^{\oplus,l}$  and  $v^{\ominus,l}$ , representing the direction of the neural activity’s changes as a result of the target  
 1245 pattern being given  $\ominus \rightarrow \oplus$  and the weights being updated  $W \rightarrow W'$ , respectively.

1246 ▶ **b** | The prospective index  $\phi^l$  is the cosine similarity of  $v^{\oplus,l}$  and  $v^{\ominus,l}$ . A small constant  $\kappa = 0.00001$   
 1247 is added in the denominator to ensure that the prospective index is still defined if the length of one of the  
 1248 vectors is 0 (in which case the prospective index is equal to 0). For EBNs, the neural activity settles to a  
 1249 new configuration when the target pattern is provided, i.e.,  $x_W^{\oplus,l} \neq x_W^{\ominus,l}$ , so  $\phi^l$  is non-zero; for ANNs, the  
 1250 neural activity stays unchanged when the target pattern is provided, i.e.,  $x_W^{\oplus,l} = x_W^{\ominus,l}$ , so  $\phi^l$  is zero.

1251 ▶ **c** | A positive  $\phi^l$  implies that  $v^{\oplus,l}$  and  $v^{\ominus,l}$  are pointing in the same direction, i.e., the neural activity  
 1252 after the target pattern provided  $x_W^{\oplus,l}$  is similar to the neural activity after the weight update  $x_W^{\ominus,l}$ , i.e., is  
 1253 prospective. We define the models following the principle of prospective configuration as those with  
 1254 positive  $\phi^l$  (averaged over all layers). Additionally, prospective index close to 1 implies that a weight  
 1255 update rule in a model is able to consolidate the pattern of activity following relaxation, so a similar pattern  
 1256 is reinstated during prediction on the next trial.

1257 ▶ **d** | The prospective index  $\phi^l$  of different layers  $l$  in PCNs and a variant of PCNs called target-PCNs.  
 1258 Several observations can be made, and they are explained and proved in Supplementary Information 2.3.

1259 ▶ **e** | The prospective index  $\phi^l$  of different EBNs and ANNs. Here, we can see that all EBNs produce  
 1260 positive  $\phi^l$ , i.e., the prospective configuration is commonly observed in EBNs, but not in ANNs. Among  
 1261 the EBNs, *Deep Feedback Control*<sup>124</sup> (DFC) was proposed to work with “infinitely weak nudging”, as in  
 1262 equilibrium propagation<sup>24</sup>. More recent work demonstrates that it also works with “strong control”<sup>92,93</sup>

1263 (thus, called strong-DFC), i.e., with the natural form of EBNs. The prospective index was measured  
1264 for this strong-DFC model and shows it belongs to one of EBNs that process prospective configuration.  
1265 Details of the simulated strong-DFC model can be found in Section 2.1 of Supplementary Information.

1266 **Implementation details.** We train various models to predict a target pattern from an input pattern (both  
1267 randomly generated from  $\mathcal{N}(0, 1)$ ). The structure of the networks is  $64 \rightarrow 64 \rightarrow 64 \rightarrow 64 \rightarrow 64 \rightarrow 64 \rightarrow$   
1268  $64$ . The weights are initialized using Xavier normal initialization<sup>110</sup> (described in the Methods). No  
1269 activation function was used. Batch size is set to 1. The models were trained for one iteration (i.e., one  
1270 update of the weights), the prospective index was then measured for this update. Prospective indices of  
1271 input and output layers are not reported. This is because the input and output layers are held fixed during  
1272 learning; thus, the prospective index is not defined for them. Experiments were repeated 5 times. The  
1273 EBNs investigated include PCNs<sup>25,40,52</sup>, target-PCNs, and *GeneRec*<sup>105</sup>, while the ANNs investigated  
1274 include backpropagation and *Almeida-Pineda*<sup>106–108</sup>. Details of all simulated models are given in Section  
1275 2.1 of Supplementary Information.

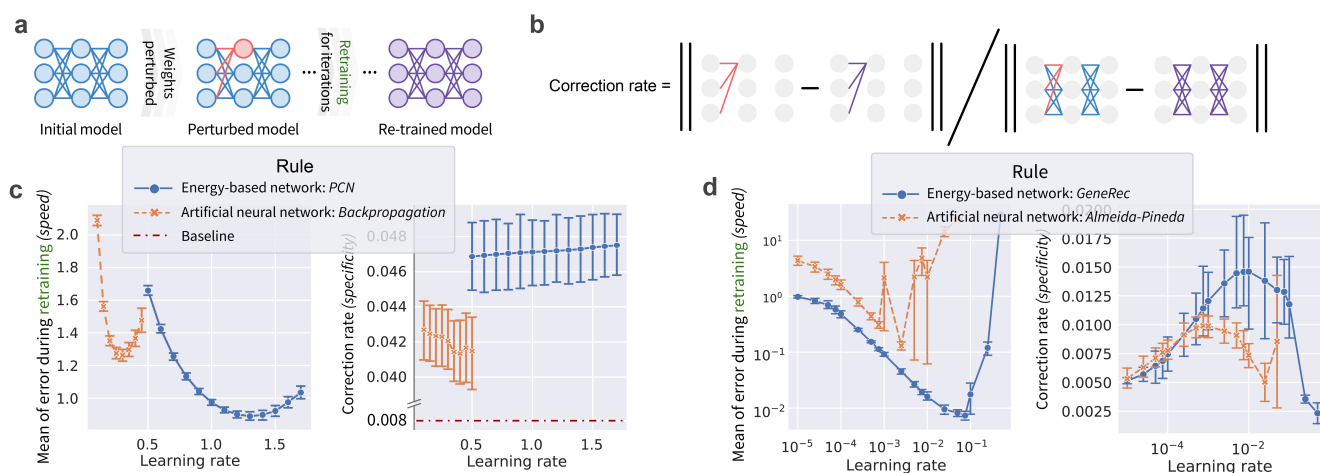

### Extended Data Fig. 6

1276 **Prospective configuration yields a more accurate weight modification.** A numerical experiment (panels  
 1277 a–b) verifies that *energy-based networks* (EBNs) yield a accurate weight modification than *artificial*  
 1278 *neural networks* (ANNs) (panels c–d). The following intuition can be provided for why the prospective  
 1279 configuration enables an accurate weight modification. In EBNs, if more error is assigned to a neuron, this  
 1280 neuron will settle to a prospective activity that reduces the error. The prospective activity of this neuron is  
 1281 then propagated through the network, resulting in less error being assigned to other neurons, thus the error  
 1282 being assigned more accurately.

1283 ▶ **a** | Experimental procedure: we take a pre-trained model (illustration here does not reflect the real  
 1284 size of the model), randomly select a hidden neuron and perturb the synaptic weights connecting to this  
 1285 neuron (red), then retrain this model on the same pattern for a fixed number of iterations. During retraining,  
 1286 an optimal learning agent is expected to identify that the error in the output neurons is due to the perturbed  
 1287 weights, thus, (1) correct the error faster, and (2) correct the perturbed weights more. We refer to the above  
 1288 two properties as *speed* and *specificity*. Speed can be measured with the mean of error over retraining  
 1289 iterations (the lower, the better).

1290 ▶ **b** | Specificity can be measured by correction rate (the higher, the better): the ratio of how much the  
 1291 perturbed weights are corrected compared to how much all the weights (in all layers) are corrected after  
 1292 all retraining iterations.

1293 ▶ **c** | A comparison between an EBN, predictive coding network<sup>25,40,52</sup> (PCN), and an ANN, trained  
 1294 with backpropagation. In the right plot, there is an additional baseline, which is the number of perturbed  
 1295 weights divided by the number of all the weights, indicating the expected correction rate if a learning rule  
 1296 randomly assigns errors.

1297 ▶ **d** | The same comparison as in panel c, but for another EBN, namely, *GeneRec*<sup>105</sup>. *GeneRec*  
 1298 describes learning in recurrent networks, and ANN with this architecture is not trained by standard  
 1299 backpropagation, but by a variant of backpropagation, called *Almeida-Pineda*<sup>106–108</sup>.

1300 **Implementation details.** We first pre-train the models to predict a target pattern from an input pattern (both  
 1301 randomly generated from  $\mathcal{N}(0, 1)$  and of 32 entries). The structure of the networks is  $32 \rightarrow 32 \rightarrow 32 \rightarrow 32$ .  
 1302 The pre-training session is sufficiently long (1000 iterations) to reach convergence. Then, one neuron  
 1303 is randomly selected from the  $(32 + 32)$  hidden neurons, and all weights connecting to this neuron are  
 1304 “flipped” (i.e., multiplied by  $-1$ ). Current weights of the network are recorded as  $\mathbf{W}_b$ . The part of current  
 1305 weights that were just flipped are recorded as  $\mathbf{W}_b^f$ . The network is then re-trained on the same pattern  
 1306 for 64 iterations. After each re-training iteration, the model makes a prediction. The square difference

1307 between the prediction and the target pattern is recorded as the “error during re-training” of this iteration.  
1308 After the entire re-training session, the “errors during re-training” are averaged over the 64 re-training  
1309 iterations, producing the left plots of panels c–d. Current weights of the network are recorded as  $\mathbf{W}_a$ . The  
1310 part of current weights that were flipped before the re-training session are recorded as  $\mathbf{W}_a^f$ . The *correction*  
1311 *rate* is computed as  $\| \mathbf{W}_a^f - \mathbf{W}_b^f \| / \| \mathbf{W}_a - \mathbf{W}_b \|$ , which produces the right plots of panels c–d. Each  
1312 configuration was repeated 20 times, and the error bars represent standard error.

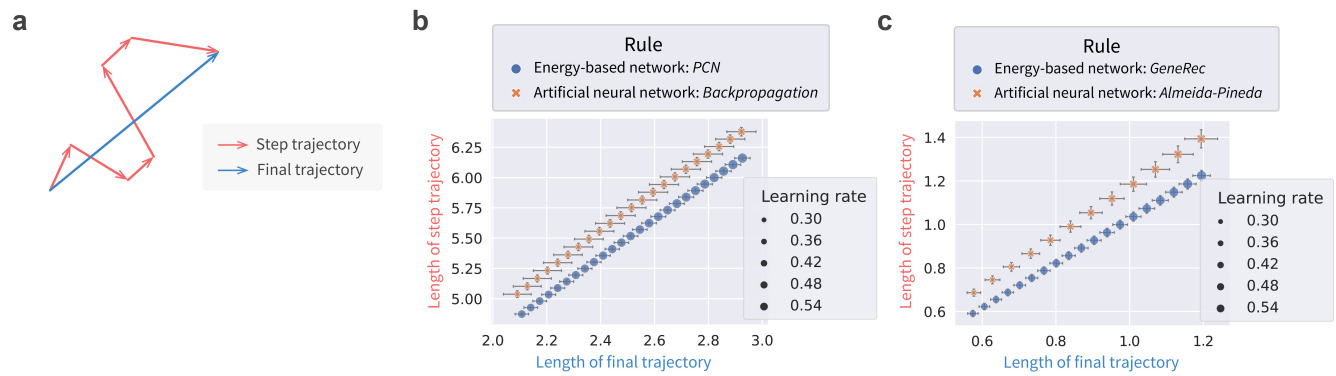

Extended Data Fig. 7

1313 **Prospective configuration produces less erratic weight modification.** An experiment verifies that  
1314 *energy-based networks* (EBNs) (i.e., prospective configuration), produce a less erratic weight modification  
1315 than *artificial neural networks* (ANNs) (i.e., backpropagation).

1316 ▶ **a** | Experimental procedure. The weights are updated for a fixed number of steps on a fixed number  
1317 of data points, which produces the step trajectory in the weight space (each red arrow corresponds to one  
1318 weights update). Connecting the start and end points of the step trajectory (i.e., the initial and final  
1319 weights of the model) produces the final trajectory (blue). A learning rule with less erratic weight modification  
1320 would produce a shorter step trajectory relative to the final trajectory. This property of less erratic weight  
1321 modification is also desirable for biological systems, because each weight modification costs metabolic  
1322 energy.

1323 ▶ **b** | Comparison of the length of step and final trajectories between EBN, predictive coding network  
1324 (PCN), and an ANN, trained with backpropagation. Note that the length of both trajectories depends on  
1325 the learning rate. Thus, in panels b–c, we present the length of the step and final trajectory on y and x axis,  
1326 respectively; each point is from a specific learning rate (represented by the size of the marker; the legend  
1327 does not enumerate all sizes). In such plots, when the two learning rules produce roughly the same length  
1328 of final trajectory (which could be from different learning rates), one can compare the length of their step  
1329 trajectory.

1330 ▶ **c** | The same comparison as in panel c, but for another EBN, namely, *GeneRec*<sup>105</sup>. *GeneRec*  
1331 describes learning in recurrent networks, and ANN with this architecture is not trained by standard  
1332 backpropagation, but by a variant of backpropagation, called *Almeida-Pineda*<sup>106–108</sup>.

1333 **Implementation details.** We train the models to predict a target pattern from an input pattern (both  
1334 randomly generated from  $\mathcal{N}(0, 1)$  and of 32 entries), and there are 32 pairs of them (32 datapoints). The  
1335 structure of the networks is  $32 \rightarrow 32 \rightarrow 32 \rightarrow 32$ . The batch size is one, as biological systems update  
1336 the weights after each experience. The training is conducted for 64 epochs (one epoch iterates over all  
1337 32 datapoints). At the end of each epoch, current weights of the network are recorded as one set. Thus,  
1338 it results in a sequence of 64 sets of weights. Each set of weights is used as one point to construct the  
1339 step trajectory. The first and last sets of weights are used to construct the final trajectory. The length of  
1340 the step and final trajectories can then be computed and reported in Extended Data Figs. 7b–c. For each  
1341 combination of learning rule and learning rate, simulation is repeated 20 times with different seeds, and  
1342 the error bars represent standard error.

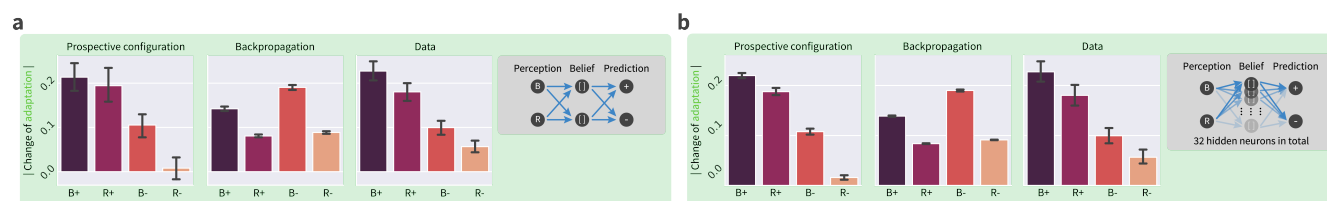

Extended Data Fig. 8

1343 **Motor learning experiment with fully-connected structure and more hidden neurons.** In the  
1344 experiments explaining biological observations, for simplicity, we simulated minimal networks necessary  
1345 to perform these tasks, but it is important to establish if task structure can be discovered and learned by  
1346 the networks without specifying network structure. Thus, here we repeat the motor learning experiment in  
1347 Fig. 5 with general fully-connected structure (panel a) and 32 hidden neurons (panel b). Insets illustrate  
1348 the structure of the networks. In both cases, prospective configuration is able to discover the task structure  
1349 itself and reproduce the experimental observations; while backpropagation cannot.

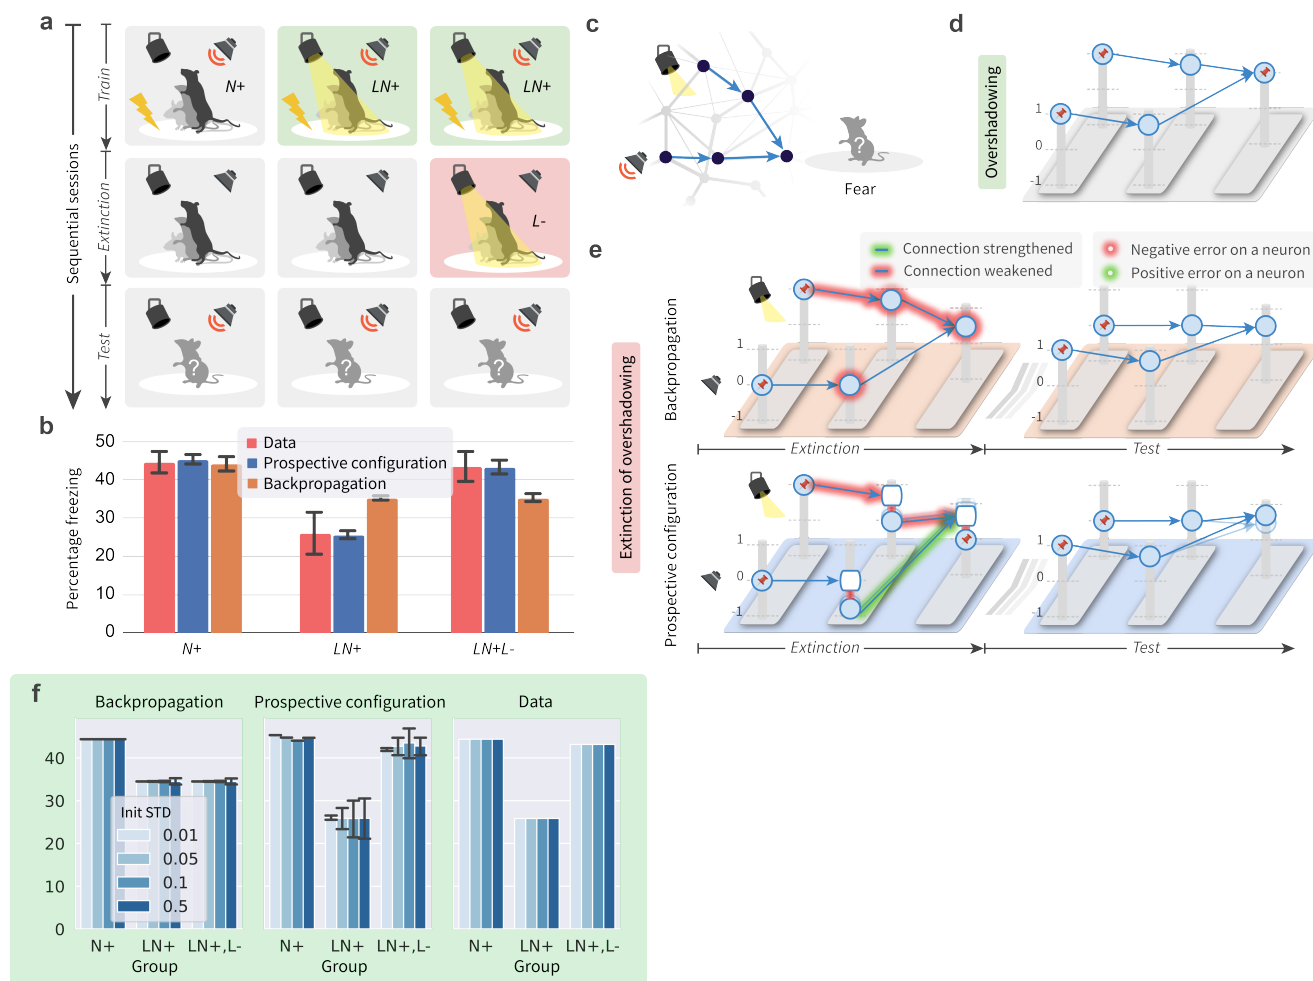

Extended Data Fig. 9

1350 **Prospective configuration explains extinction of overshadowing in fear conditioning (complete**  
 1351 **description of the experiment in Fig. 6).** The extinction of overshadowing effect<sup>77</sup> can be accurately  
 1352 reproduced and explained by prospective configuration, but not backpropagation (comparing “Data”  
 1353 against “Prospective configuration” and “Backpropagation” in panel b).

1354 ▶ **a** | Experimental procedure. Rats were divided into three groups, corresponding to three columns.  
 1355 Each group underwent three sessions sequentially, corresponding to the top three rows, namely, train,  
 1356 extinction, and test. The goal of the training session was to associate fear (+) with different presented  
 1357 stimuli *N* or *LN* depending on the group: rats experienced an electric shock paired with different stimuli,  
 1358 where *N* and *L* stands for noise and light, respectively. Next, during the extinction session no shock was  
 1359 given, and for the third group the light was presented but without the shock, aiming to eliminate the fear  
 1360 (-) of light (*L*). Finally, all groups underwent a test session measuring how much fear was associated with  
 1361 the noise: the noise was presented and the percentage of freezing of rats was measured.

1362 ▶ **b** | Experimental and simulation results. The bar chart plots the percentage of freezing during  
 1363 test for each group, both measured in the animal experiments<sup>77</sup> (i.e., Data) and simulated by the two  
 1364 learning rules. Two effects are present in experimental data. First, comparing the groups *N+* and *LN+*  
 1365 demonstrates the overshadowing effect: there is less fear of noise if the noise had been compounded with  
 1366 light when paired with shock *LN+* than if the noise alone had been paired with shock *N+* (that is, light



1367 overshadows noise in a conditioned fear experiment). This effect can be accounted for by the canonical  
1368 model of error-driven learning — the Rescorla-Wagner model<sup>82</sup>, and consequently it can be also produced  
1369 by both error-driven models we consider — backpropagation and prospective configuration (explained  
1370 in panel d). Second, comparing the groups  $LN+$  and  $LN+L-$  shows the striking effect of extinction of  
1371 overshadowing: presenting the light without the shock increases the fear response to the non-presented  
1372 stimulus — noise. This effect is not produced by backpropagation, but can be reproduced by prospective  
1373 configuration (explained in panel e).

1374 ▶ **c** | The neural architecture considered: both stimuli are processed by hidden neurons (i.e., inter-  
1375 mediate neurons corresponding to visual and auditory cortices) and are then combined to produce the  
1376 prediction of electric shock (i.e., fear).

1377 ▶ **d** | Explanation of overshadowing effect, i.e., the reduced percentage freezing comparing group  
1378  $LN+$  against  $N+$ . With the energy machine introduced in Fig. 2, the diagram illustrates the state of the  
1379 network after the *Train* sessions in groups  $LN+$  and  $LN+L-$ . The network learns to predict a shock (i.e.  
1380 produces output of 1), on the basis of two stimuli, hence each of the inputs to the output neuron must be  
1381 0.5. Therefore, if only one stimulus is presented, the output of the network is reduced to 0.5. The network  
1382 shown in this panel is acting as the starting point of learning in panel e.

1383 ▶ **e** | Explanation of extinction of overshadowing effect, i.e., the increased percentage freezing after  
1384 noise in group  $LN+L-$  in comparison to  $LN+$ . This effect suggests that during extinction trials, where  
1385 light is presented without a shock, the animals increased fear prediction to noise. As shown in this  
1386 panel, backpropagation (top) cannot explain this, since the error cannot be backpropagated to and drive a  
1387 weight modification on a non-activated branch where no stimuli are presented; prospective configuration  
1388 (bottom), however, can account for this. Specifically, on the non-activated branch, the hidden neural  
1389 activity decreases from zero to a small negative value (it may correspond to a neural activity decreasing  
1390 below the baseline<sup>125</sup>). Since a weight modification depends on the product of the presynaptic activity  
1391 and the postsynaptic activity representing the error, which are both negative here, the weight on the  
1392 non-activated branch is strengthened.

1393 ▶ **f** | Robustness to different standard deviations of initial weights. We also simulated networks with  
1394 different standard deviations of initial weights (ranging from 0.01 to 0.5, represented by the depth of  
1395 the colour). It is shown that prospective configuration fits better to the data measured in the animal  
1396 experiments than backpropagation, regardless of the standard deviation of initial weights.

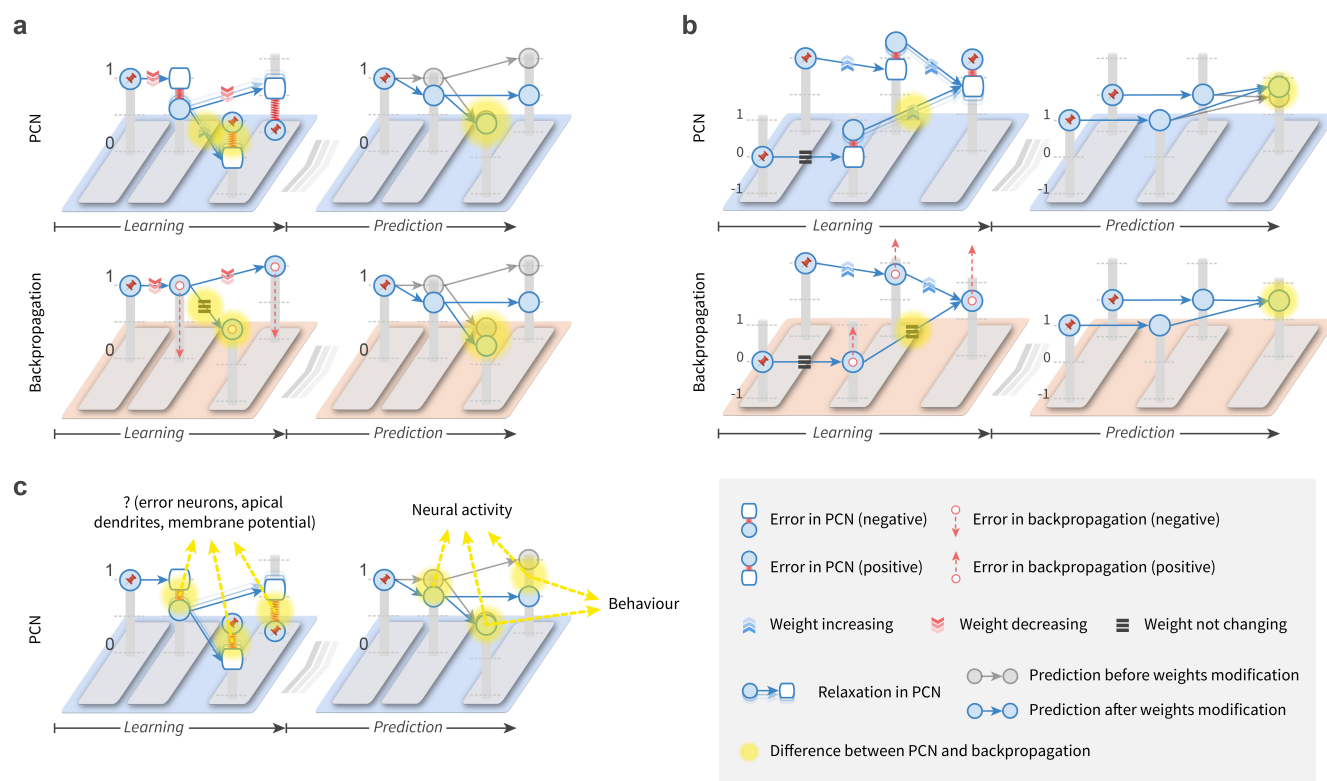

**Extended Data Fig. 10**

1397 **Experimental predictions of prospective configuration and backpropagation.** To provide examples of  
 1398 experimental predictions of prospective configuration, panels a-b (and Extended Data Fig. 11) add the  
 1399 different behaviour of the learning rules in simple network motifs, which are minimal networks displaying  
 1400 given behaviour. Two motifs in this figure have been already analysed earlier in the paper, but there we  
 1401 focused on differences corresponding to experimentally observed effects, while in this figure we also  
 1402 add other qualitative differences that reveal a range of untested predictions of prospective configuration.  
 1403 Here, we consider a *predictive coding network*<sup>25,40,52</sup> (PCN) with the energy machine in Fig. 2, however,  
 1404 a similar analysis can be applied to other energy-based networks, which also follow the principle of  
 1405 prospective configuration. In each panel, the top and bottom rows demonstrate the prediction of PCNs and  
 1406 backpropagation, respectively. The left column adds the differences in the prediction errors during learning  
 1407 and the resulting weight update. The right column demonstrates the neuron activity before (transparent)  
 1408 and after (opaque) weight update. The differences between the rules are added in yellow. Experimental  
 1409 predictions following from them can be derived as summarized in panel c.

1410 ▶ **a** | The error may spread to the branch where the prediction is correctly made. This motif has been  
 1411 compared with experimental data in Fig. 7, but here we focus on the effect illustrated in Fig. 1 and Fig. 2d,  
 1412 which despite being intuitive, has not been tested experimentally to our knowledge. The panel adds that  
 1413 an error on one output in PCN results in prediction error on the other, correctly predicted output. This  
 1414 produces an increase of the weight of the correct output neuron, which compensates for the decrease of  
 1415 the weight from the input, and enables the network to make correct prediction on the next trial.

1416 ▶ **b** | The error may cause a weight change in the sensory regions associated with absent stimuli.  
 1417 The panel shows a similar motif as the one investigated in Extended Data Fig. 9. The difference is that  
 1418 Extended Data Fig. 9 introduces negative error while this panel introduces positive error on the same  
 1419 architecture. Interestingly, introducing negative (Extended Data Fig. 9) or positive (this panel) error to the

1420 same architecture produce a similar effect in the PCN, i.e. an increased predicted output for the stimulus  
1421 not presented during learning.

1422 ► **c** | Observing model behaviour in experiments. The diagram summarizes how the differences  
1423 added in previous panels could be measured in experiments. The key difference in models' behaviour  
1424 during learning is the difference in error signals. However, currently it is not clear how the prediction  
1425 errors are represented in the cortical circuits. Three hypotheses have been proposed in the literature  
1426 that errors are encoded in: activity of separate error neurons<sup>40,121,126</sup>, membrane potential of value  
1427 neurons<sup>127,128</sup>, membrane potential in apical dendrites of value neurons<sup>22,32</sup>. Nevertheless, if the future  
1428 research establishes how errors are encoded, it will be possible to test the predictions related to errors  
1429 during learning. For example, one can design a task corresponding to panel a, where predictions in two  
1430 modalities have to be made on the basis of a stimulus. One can then test if omission in one modality results  
1431 in error signals in the brain region corresponding to the correctly predicted modality. The models also  
1432 differ in the neural activity of the value nodes during the next trial following the learning. Such predictions  
1433 are easier to test, because if the model makes a prediction without observing any supervised signal, then  
1434 all errors are equal to 0 in PCNs, so the neural activity should reflect just the activity of value nodes.  
1435 Additionally, the differences in the activity of the output value neurons should be testable in behavioural  
1436 experiments. For example, panel b makes a behavioural prediction (presenting light with stronger shock  
1437 should also increase freezing for tone) that can be tested in a similar way as described in Extended Data  
1438 Fig. 9. Testing this prediction would also validate our explanation of the experimental result in Extended  
1439 Data Fig. 9.

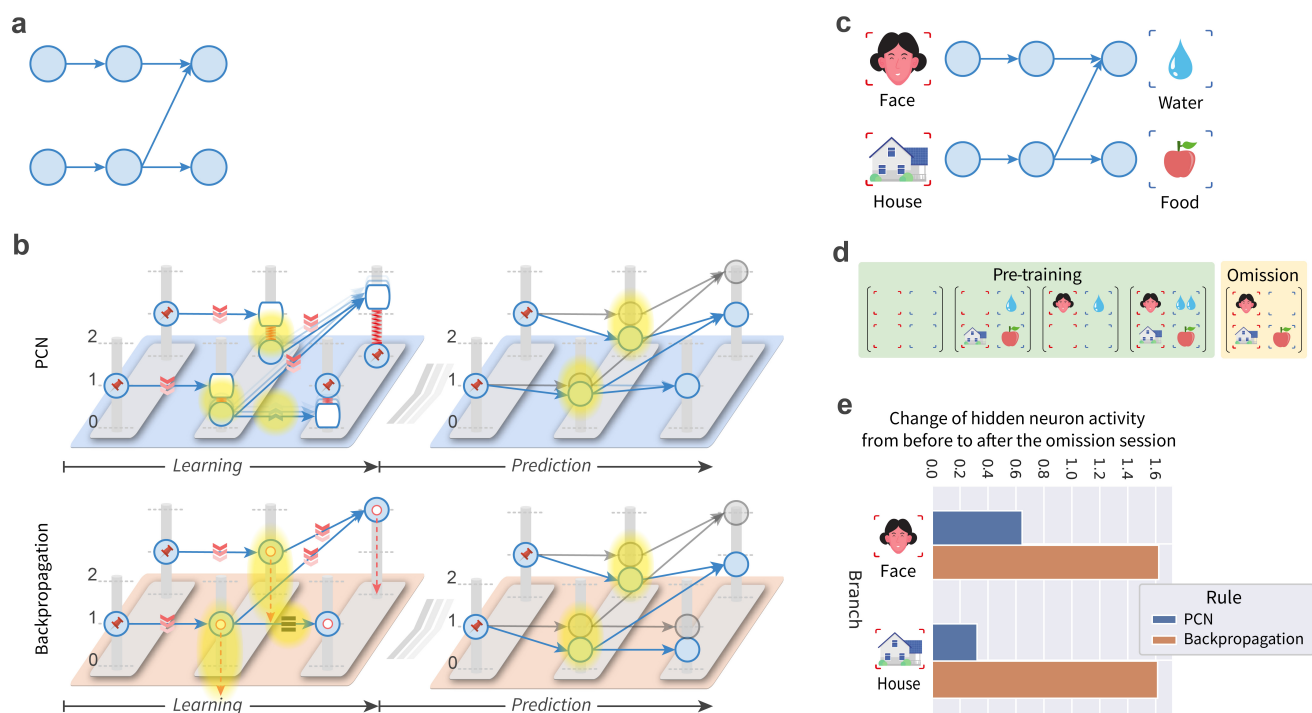

**Extended Data Fig. 11**

1440 **Experimental predictions concerning errors assigned to hidden nodes.** The figure demonstrates a  
 1441 striking difference in how prospective configuration and backpropagation assign error to hidden nodes.  
 1442 Namely, in prospective configuration, the error assigned to a hidden node is reduced if the node is also  
 1443 connected to correctly predicted outputs. This difference is illustrated in a motif (panel a), for which we  
 1444 illustrate behaviour of learning rules with the energy machine (panel b), and describe a sample experiment  
 1445 testing model predictions (panels c–d). Finally, we report the simulation results of the two learning rules  
 1446 (panel e), confirming that they indeed make distinct predictions for this motif.

1447 ▶ **a** | In this motif, two stimuli are presented and two predictions are made. One stimulus contributes  
 1448 to only one prediction, while the other stimulus contributes to both predictions.

1449 ▶ **b** | Comparison of learning rules' behaviour with the energy machine (notation as in Extended Data  
 1450 Fig. 10). The diagrams illustrate a network containing the motif (panel a), in a situations where one of the  
 1451 predicted outputs (top output) is omitted. A negative error is introduced to the prediction determined by  
 1452 both stimuli. Thus, we would expect the error to be assigned to hidden neurons on both branches. Both  
 1453 learning rules do so, however, they assign errors differently. PCNs allocate less error on the bottom hidden  
 1454 neuron than the top hidden neuron, because the bottom hidden neuron also contributes to another output  
 1455 that was correctly predicted, while backpropagation assigns the same error to both hidden neurons. This is  
 1456 also a nice example where prospective configuration (PCNs) demonstrates more intelligent behavior.

1457 ▶ **c** | Experimental stimuli. To test this motif, it is important to choose stimuli for which neural activity  
 1458 of “hidden” neurons can be easily measured. In case of a human experiment, inputs could contain faces  
 1459 and houses, because the hidden neurons would correspond to the brain regions known to be specifically  
 1460 excited by these particular types of stimuli, and the activity of these regions could be easily distinguished  
 1461 in an experiment<sup>129</sup>. The outputs could correspond to reward modalities (e.g. water and food). In case of a  
 1462 human experiment, these could be “virtual rewards” the participants are instructed to gather, while for  
 1463 animals, these could be the actual rewards.

1464 ▶ **d** | Experimental procedure. The motif shown in panel c could arise in brain networks from training

1465 with examples shown in the green box. To test differences in behaviour of learning rules, partial omission  
1466 trials could be presented, in which one of the expected outputs is omitted, as shown in the orange box.

1467 ▶ e | Results of simulations. We pre-train the models with the examples in the green box in panel d for  
1468 a sufficient number of iterations until convergence, and then we train the model with the omission using  
1469 the example in the orange box in panel d for one trial. We measure the change of hidden neural activity on  
1470 both branches from before to after the above omission session. The graph shows simulation results of such  
1471 change in hidden activity: PCNs predict different changes on different branches, while backpropagation  
1472 predicts the same change on different branches (consistent with illustration in panel b, right).

1473 **Implementation details.** Presenting and not presenting a stimulus (face, house, water, or food) are  
1474 encoded as 1 and 0, respectively. Presenting two drops of water is encoded as 2. The network is initialized  
1475 to the pre-trained connection pattern demonstrated in Extended Data Figs. 11c, i.e., the weights visible  
1476 on the panel are set to one and other weights are set to zero. Such pattern of weights would arise from  
1477 pre-training with the four examples in Extended Data Figs. 11d (in the green “Pre-training” box), but for  
1478 simplicity, we do not simulate such pre-training but just set the weights as explained before. Next, to  
1479 measure the activity of hidden units of such network during prediction, we set both inputs to 1 and record  
1480 the hidden neural activity of the two branches. Subsequently, the model is presented with the omission  
1481 trial shown in the orange box and the weights are updated once. Finally, to measure weight changes  
1482 resulting from training on the subsequent prediction trial, we set both inputs to 1 and record the hidden  
1483 neural activity of the two branches for the second time. The change of the hidden neuron activity from  
1484 before to after the omission session can thus be computed for both branches.

## 1485 2 Supplementary Information

1486 In this supplement, we present additional description and analysis of the simulated models. In Section 2.1,  
1487 we provide details of all models simulated in the paper. In Section 2.2, we discuss relationship between  
1488 prospective configuration and target propagation. In Section 2.3, we analyse prospective index of PCNs.  
1489 In Section 2.4, we analyse target alignment of various learning models.

### 1490 2.1 Details of simulated models

1491 This section gives more details of all simulated models. The general idea of *energy-based networks* (EBNs)  
1492 and *artificial neural networks* (ANNs), and one of EBNs, *predictive coding network*<sup>25,40,52</sup> (PCN), have  
1493 been described in the Main text and Methods. PCN is again included here along with other simulated  
1494 models to provide descriptions in a unified form, facilitating the reproduction of our reported results.  
1495 Complete code and full documentation reproducing all simulation results will be made publicly available  
1496 at <https://github.com/YuhangSong/A-New-Perspective> upon publication of this work.

1497 Algorithms 3 to 7 describe how the four models simulated in this paper predict and learn. These four  
1498 models are: PCN, backpropagation, *GeneRec*<sup>105</sup>, and *Almeida-Pineda*<sup>106–108</sup>. Among the four models,  
1499 PCN and GeneRec are the two EBNs we investigate; backpropagation and Almeida-Pineda are the two  
1500 ANNs we investigate. Specifically, PCN is compared against backpropagation, because it has been  
1501 established that PCN are closely related to backpropagation<sup>25,33</sup> and they make the same prediction with  
1502 the same weights and input pattern<sup>25</sup>. Therefore we simulated prediction in these two algorithms in the  
1503 same way (Algorithm 3). However, they learn differently (c.f. Algorithms 4 and 1). The other EBN,  
1504 GeneRec, describes learning in recurrent networks, and ANN in this architecture is not trained by standard  
1505 backpropagation, but a modified version proposed by Almeida and Pineda<sup>106–108</sup> (thus called the *Almeida-*  
1506 *Pineda* algorithm). Thus, GeneRec should be compared against Almeida-Pineda because they make same  
1507 prediction with the same weights and input pattern<sup>105</sup>. Therefore we simulated prediction in these two  
1508 algorithms in the same way (Algorithm 5). But they learn differently (c.f. Algorithms 6 and 7). In a  
1509 word, PCN and backpropagation are EBN and ANN working in feed-forward architecture, respectively;  
1510 GeneRec and Almeida-Pineda are EBN and ANN working in recurrent architecture, respectively.

---

#### Algorithm 3: Predict with backpropagation or *predictive coding network*<sup>25,40,52</sup> (PCN)

---

**Input:** input pattern  $\mathbf{s}^{\text{in}}$ ; synaptic weights  $\{\mathbf{w}^1, \mathbf{w}^2, \dots, \mathbf{w}^L\}$

**Result:** activity of output neurons  $\mathbf{x}^{L+1}$

```
1  $\mathbf{x}^1 = \mathbf{s}^{\text{in}}$ ; // Clamp input neurons to input pattern
2 for  $l = 1; l < L + 1; l = l + 1$  do // Forward pass of the network
3 |  $\mathbf{x}^{l+1} = \mathbf{w}^l f(\mathbf{x}^l)$ ;
4 end
```

---

1511  
1512 Particularly, PCN & Backpropagation work in a network where prediction is made from the input  
1513 through a series of forward weights  $\{\mathbf{w}^1, \mathbf{w}^2, \dots, \mathbf{w}^L\}$ ; GeneRec & Almeida-Pineda works in a net-  
1514 work where prediction is made from input through a mixture of forward weights  $\{\mathbf{w}^1, \mathbf{w}^2, \dots, \mathbf{w}^L\}$  and  
1515 backward weights  $\{\mathbf{m}^1, \mathbf{m}^2, \dots, \mathbf{m}^L\}$ . The forward weights  $\{\mathbf{w}^1, \mathbf{w}^2, \dots, \mathbf{w}^L\}$  and backward weights  
1516  $\{\mathbf{m}^1, \mathbf{m}^2, \dots, \mathbf{m}^L\}$  are not necessarily related. This architecture is also similar to the continuous Hopfield  
1517 model<sup>130,131</sup>. Unlike in some previous studies<sup>24</sup>, here, we focus on layered networks, where the sets of  
1518 neurons at adjacent layers  $\mathbf{x}^l$  and  $\mathbf{x}^{l+1}$  are connected by synaptic weights. Thus, we define two sets of  
1519 weights for GeneRec & Almeida-Pineda that works in the recurrent network:  $\mathbf{w}^l$  is the forward weights

1520 connecting from  $\mathbf{x}^l$  to  $\mathbf{x}^{l+1}$ ;  $\mathbf{m}^l$  is the backward weights connecting from  $\mathbf{x}^{l+1}$  to  $\mathbf{x}^l$ .

---

**Algorithm 4:** Learn with backpropagation

---

**Input:** input pattern  $\mathbf{s}^{\text{in}}$ ; target pattern  $\mathbf{s}^{\text{target}}$ ; synaptic weights  $\{\mathbf{w}^1, \mathbf{w}^2, \dots, \mathbf{w}^L\}$   
**Output:** updated synaptic weights  $\{\mathbf{w}^1, \mathbf{w}^2, \dots, \mathbf{w}^L\}$

```

1  $\mathbf{x}^1 = \mathbf{s}^{\text{in}}$ ; // Clamp input neurons to input pattern
2 for  $l = 1; l < L + 1; l = l + 1$  do // Forward pass of the network
3 |  $\mathbf{x}^{l+1} = \mathbf{w}^l f(\mathbf{x}^l)$ ;
4 end
5  $\boldsymbol{\varepsilon}^{L+1} = \mathbf{s}^{\text{target}} - \mathbf{x}^{L+1}$ ; // Compute error of the output neurons
6 for  $l = L + 1; l > 2; l = l - 1$  do // Backpropagation of error
7 |  $\boldsymbol{\varepsilon}^{l-1} = f'(\mathbf{x}^{l-1}) \circ ((\mathbf{w}^{l-1})^T \boldsymbol{\varepsilon}^l)$ ;
8 end
9 for  $l = 1; l < L + 1; l = l + 1$  do // Update weights
10 |  $\Delta \mathbf{w}^l = \alpha \boldsymbol{\varepsilon}^{l+1} (f(\mathbf{x}^l))^T$ ;
11 |  $\mathbf{w}^l = \mathbf{w}^l + \Delta \mathbf{w}^l$ ;
12 end

```

---

1521

1522 Also note that GeneRec has been explored and re-discovered in recent works<sup>48,132</sup> showing how a  
1523 closely related algorithm resembles backpropagation when the backward weights are the transposes of the  
1524 forward weights  $\mathbf{m}^l = (\mathbf{w}^l)^T$  (or for a fully-connected network in their context  $w_{i,j} = w_{j,i}$ ), and how the  
1525 extreme version of the algorithm approximate backpropagation<sup>24</sup>.

1526 Extended Data Fig. 5 additionally investigates *Strong Deep Feedback Control*<sup>92,93</sup> (strong-DFC). *Deep*  
1527 *Feedback Control*<sup>124</sup> (DFC) was proposed to work with “infinitely weak nudging”, as in equilibrium  
1528 propagation<sup>24</sup>. More recent work demonstrates that it also works with “strong control”<sup>92,93</sup> (thus, called  
1529 strong-DFC), i.e., with the natural form of EBNs. Thus, in this paper we investigate strong-DFC. In  
1530 strong-DFC (or DFC in general), backward weights  $\mathbf{m}^l$  do not connect from layer  $l + 1$  to layer  $l$  as in  
1531 other models investigated in the paper. Instead,  $\mathbf{m}^l$  connects from the output layer  $L + 1$  to layer  $l$ . We use  
1532 the provided code in [https://github.com/mariacer/strong\\_dfc](https://github.com/mariacer/strong_dfc) to simulate strong-DFC.  
1533 All hyper parameters are kept as is in the provided code. We remove the activation function of the last  
1534 layer in the original implementation<sup>124</sup>, to keep consistent with the rest of the models investigated in  
1535 this paper, thus, provides a fair comparison. Derivation and motivation of the model can be found in the  
1536 original paper<sup>92,93</sup>.

1537 Some common notations in the algorithms are:  $\alpha$  is the learning rate for weights update;  $\gamma$  and  $\mathcal{T}$  are  
1538 the integration step and length of relaxation, respectively (specified to the two EBNs, PCN and GeneRec);  
1539  $\mathbf{s}^{\text{in}}$  and  $\mathbf{s}^{\text{target}}$  are the input and target patterns, respectively. For Almeida-Pineda, which requires additional  
1540 iterative process to propagate error,  $\beta$  and  $\mathcal{K}$  are the integration step and length of this iterative process,  
1541 respectively. In our simulation, we use  $\beta = 0.01$  and  $\mathcal{K} = 1600$ .

1542 All simulated models work in mini-batch mode, that is to say, one iteration is to update the weights for  
1543 one step on a mini-batch of data randomly sampled from the training set for classification tasks. The above  
1544 sampling is without replacement, i.e., the same examples will not be sampled again before the completion  
1545 of an epoch, which is when the entire training set has been sampled once. For example, considering a  
1546 dataset of 1000 examples with a batch-size (number of examples in a mini-batch) of 10, then each iteration  
1547 would update weights for one step on 10 examples, and it will take 100 such iterations to complete one

1548 epoch. To implement the Algorithms 3 to 7 described below in mini-batch mode, one can simply add an  
 1549 extra-dimension, the size of which is batch-size, to all the neuron-specific vectors in the algorithms such  
 1550 as  $\mathbf{x}^l$ ,  $\boldsymbol{\varepsilon}^l$  and etc., and then reduce this dimension by summing over it when computing weight update  $\Delta\mathbf{w}^l$   
 1551 (and  $\Delta\mathbf{m}^l$  if the model is GeneRec or Almeida-Pineda).

1552 Note that learning with Almeida-Pineda involves relaxation of the model, i.e., updating neural activity,  
 1553 in lines 5-12 of Algorithm 6. However, its function is to make a prediction with current weights and input  
 1554 pattern so that the error on the output neurons can be computed (in the following line 13), similar as the  
 1555 function of “forward pass” in backpropagation in lines 2-4 of Algorithm 4. The neural activity in the  
 1556 Almeida-Pineda model is fixed during spreading of error, like in backpropagation. Thus, Almeida-Pineda  
 1557 is classified as an ANN rather than an EBN (which updates neural activity during spreading of error).

---

**Algorithm 5:** Predict with *Almeida-Pineda*<sup>106–108</sup> or *GeneRec*<sup>105</sup>

---

**Input:** input pattern  $\mathbf{s}^{\text{in}}$ ; forward and backward synaptic weights  $\{\mathbf{w}^1, \mathbf{w}^2, \dots, \mathbf{w}^L\}$  and  
 $\{\mathbf{m}^1, \mathbf{m}^2, \dots, \mathbf{m}^L\}$

**Result:** activity of output neurons  $\mathbf{x}^{L+1}$

```

1  $\mathbf{x}^1 = \mathbf{s}^{\text{in}}$ ; // Clamp input neurons to input pattern
2 for  $l = 2; l < L + 2; l = l + 1$  do // Initialize  $\mathbf{x}$ 
3 |  $\mathbf{x}^l = \mathbf{0}$ ;
4 end
5 for  $t = 0; t < \mathcal{T}; t = t + 1$  do // Relaxation
6 | for  $l = 2; l < L + 1; l = l + 1$  do
7 | |  $\Delta\mathbf{x}^l = \gamma(-\mathbf{x}^l + \mathbf{m}^l f'(\mathbf{x}^{l+1}) + \mathbf{w}^{l-1} f'(\mathbf{x}^{l-1}))$ ;
8 | |  $\mathbf{x}^l = \mathbf{x}^l + \Delta\mathbf{x}^l$ ;
9 | end
10 |  $\Delta\mathbf{x}^{L+1} = \gamma(-\mathbf{x}^{L+1} + \mathbf{w}^L f'(\mathbf{x}^L))$ ;
11 |  $\mathbf{x}^{L+1} = \mathbf{x}^{L+1} + \Delta\mathbf{x}^{L+1}$ ;
12 end

```

---

1558



---

**Algorithm 6:** Learn with *Almeida-Pineda*<sup>106–108</sup>

---

**Input:** input pattern  $\mathbf{s}^{\text{in}}$ ; target pattern  $\mathbf{s}^{\text{target}}$ ; forward and backward synaptic weights  $\{\mathbf{w}^1, \mathbf{w}^2, \dots, \mathbf{w}^L\}$  and  $\{\mathbf{m}^1, \mathbf{m}^2, \dots, \mathbf{m}^L\}$

**Output:** updated forward and backward synaptic weights  $\{\mathbf{w}^1, \mathbf{w}^2, \dots, \mathbf{w}^L\}$  and  $\{\mathbf{m}^1, \mathbf{m}^2, \dots, \mathbf{m}^L\}$

```

1  $\mathbf{x}^1 = \mathbf{s}^{\text{in}}$ ; // Clamp input neurons to input pattern
2 for  $l = 2; l < L + 2; l = l + 1$  do // Initialize  $\mathbf{x}$ 
3 |  $\mathbf{x}^l = \mathbf{0}$ ;
4 end
5 for  $t = 0; t < \mathcal{T}; t = t + 1$  do // Relaxation
6 | for  $l = 2; l < L + 1; l = l + 1$  do
7 | |  $\Delta \mathbf{x}^l = \gamma(-\mathbf{x}^l + \mathbf{m}^l f'(\mathbf{x}^{l+1}) + \mathbf{w}^{l-1} f'(\mathbf{x}^{l-1}))$ ;
8 | |  $\mathbf{x}^l = \mathbf{x}^l + \Delta \mathbf{x}^l$ ;
9 | end
10 |  $\Delta \mathbf{x}^{L+1} = \gamma(-\mathbf{x}^{L+1} + \mathbf{w}^L f'(\mathbf{x}^L))$ ;
11 |  $\mathbf{x}^{L+1} = \mathbf{x}^{L+1} + \Delta \mathbf{x}^{L+1}$ ;
12 end
13  $\boldsymbol{\varepsilon}^{L+1} = \mathbf{s}^{\text{target}} - \mathbf{x}^{L+1}$ ; // Compute error of the output neurons
14 for  $l = 1; l < L + 1; l = l + 1$  do // Initialize  $\boldsymbol{\varepsilon}$ 
15 |  $\boldsymbol{\varepsilon}^l = \mathbf{0}$ ;
16 end
17 for  $t = 1; t < \mathcal{K} + 1; t = t + 1$  do // Backpropagation of error
18 | for  $l = 2; l < L + 1; l = l + 1$  do
19 | |  $\Delta \boldsymbol{\varepsilon}^l = \beta(-\boldsymbol{\varepsilon}^l + f'(\mathbf{x}^l) \circ (\mathbf{m}^l \boldsymbol{\varepsilon}^{l+1}) + f'(\mathbf{x}^l) \circ (\mathbf{w}^{l-1} \boldsymbol{\varepsilon}^{l-1}))$ ;
20 | |  $\boldsymbol{\varepsilon}^l = \boldsymbol{\varepsilon}^l + \Delta \boldsymbol{\varepsilon}^l$ ;
21 | end
22 |  $\Delta \boldsymbol{\varepsilon}^1 = \beta(-\boldsymbol{\varepsilon}^1 + f'(\mathbf{x}^1) \circ (\mathbf{m}^1 \boldsymbol{\varepsilon}^2))$ ;
23 |  $\boldsymbol{\varepsilon}^1 = \boldsymbol{\varepsilon}^1 + \Delta \boldsymbol{\varepsilon}^1$ ;
24 end
25 for  $l = 1; l < L + 1; l = l + 1$  do // Update weights
26 |  $\Delta \mathbf{w}^l = \alpha \boldsymbol{\varepsilon}^{l+1} (f(\mathbf{x}^l))^T$ ;
27 |  $\mathbf{w}^l = \mathbf{w}^l + \Delta \mathbf{w}^l$ ;
28 |  $\Delta \mathbf{m}^l = \alpha \boldsymbol{\varepsilon}^l (f(\mathbf{x}^{l+1}))^T$ ;
29 |  $\mathbf{m}^l = \mathbf{m}^l + \Delta \mathbf{m}^l$ ;
30 end

```

---

---

**Algorithm 7: Learn with *GeneRec***<sup>105</sup>

---

**Input:** input pattern  $\mathbf{s}^{\text{in}}$ ; target pattern  $\mathbf{s}^{\text{target}}$ ; forward and backward synaptic weights  $\{\mathbf{w}^1, \mathbf{w}^2, \dots, \mathbf{w}^L\}$  and  $\{\mathbf{m}^1, \mathbf{m}^2, \dots, \mathbf{m}^L\}$

**Output:** updated forward and backward synaptic weights  $\{\mathbf{w}^1, \mathbf{w}^2, \dots, \mathbf{w}^L\}$  and  $\{\mathbf{m}^1, \mathbf{m}^2, \dots, \mathbf{m}^L\}$

```

1  $\mathbf{x}^1 = \mathbf{s}^{\text{in}}$ ; // Clamp input neurons to input pattern
2 for  $l = 2; l < L + 2; l = l + 1$  do // Initialize  $\mathbf{x}$ 
3 |  $\mathbf{x}^l = \mathbf{0}$ ;
4 end
5 for  $t = 0; t < \mathcal{T}; t = t + 1$  do // Relaxation
6 | for  $l = 2; l < L + 1; l = l + 1$  do
7 | |  $\Delta \mathbf{x}^l = \gamma(-\mathbf{x}^l + \mathbf{m}^l f'(\mathbf{x}^{l+1}) + \mathbf{w}^{l-1} f'(\mathbf{x}^{l-1}))$ ;
8 | |  $\mathbf{x}^l = \mathbf{x}^l + \Delta \mathbf{x}^l$ ;
9 | end
10 |  $\Delta \mathbf{x}^{L+1} = \gamma(-\mathbf{x}^{L+1} + \mathbf{w}^L f'(\mathbf{x}^L))$ ;
11 |  $\mathbf{x}^{L+1} = \mathbf{x}^{L+1} + \Delta \mathbf{x}^{L+1}$ ;
12 end
13 for  $l = 1; l < L + 1; l = l + 1$  do // Update weights (negative phase)
14 |  $\Delta \mathbf{w}^l = -\alpha f(\mathbf{x}^{l+1}) (f(\mathbf{x}^l))^T$ ;
15 |  $\mathbf{w}^l = \mathbf{w}^l + \Delta \mathbf{w}^l$ ;
16 |  $\Delta \mathbf{m}^l = -\alpha f(\mathbf{x}^l) (f(\mathbf{x}^{l+1}))^T$ ;
17 |  $\mathbf{m}^l = \mathbf{m}^l + \Delta \mathbf{m}^l$ ;
18 end
19  $\mathbf{x}^{L+1} = \mathbf{s}^{\text{target}}$ ; // Clamp output neurons to target pattern
20 for  $t = 0; t < \mathcal{T}; t = t + 1$  do // Relaxation
21 | for  $l = 2; l < L + 1; l = l + 1$  do
22 | |  $\Delta \mathbf{x}^l = \gamma(-\mathbf{x}^l + \mathbf{m}^l f'(\mathbf{x}^{l+1}) + \mathbf{w}^{l-1} f'(\mathbf{x}^{l-1}))$ ;
23 | |  $\mathbf{x}^l = \mathbf{x}^l + \Delta \mathbf{x}^l$ ;
24 | end
25 end
26 for  $l = 1; l < L + 1; l = l + 1$  do // Update weights (positive phase)
27 |  $\Delta \mathbf{w}^l = \alpha f(\mathbf{x}^{l+1}) (f(\mathbf{x}^l))^T$ ;
28 |  $\mathbf{w}^l = \mathbf{w}^l + \Delta \mathbf{w}^l$ ;
29 |  $\Delta \mathbf{m}^l = \alpha f(\mathbf{x}^l) (f(\mathbf{x}^{l+1}))^T$ ;
30 |  $\mathbf{m}^l = \mathbf{m}^l + \Delta \mathbf{m}^l$ ;
31 end

```

---

1560

1561 **2.2 Relationships of predictive coding networks to target propagation (Extended Data Figs. 3)**

1562 In Extended Data Figs. 3, we illustrate that prospective configuration, particularly, *predictive coding*  
1563 *network*<sup>25,40,52</sup> (PCN), has close a relationship to target propagation<sup>57</sup>. In this section, we formally prove  
1564 these observations.

1565 Note that these relationships of predictive coding networks to target propagation on one hand build  
1566 interesting connections to existing work, on the other hand serve as a step in providing a mathematical  
1567 explanation of the target alignment of predictive coding networks, as discussed in the later Section 2.4.4.

1568 **2.2.1 Target propagation**

---

**Algorithm 8:** Learn with target-propagation

---

**Input:** input pattern  $\mathbf{s}^{\text{in}}$ ; target pattern  $\mathbf{s}^{\text{target}}$ ; synaptic weights  $\{\mathbf{w}^1, \mathbf{w}^2, \dots, \mathbf{w}^L\}$   
**Output:** updated synaptic weights  $\{\mathbf{w}^1, \mathbf{w}^2, \dots, \mathbf{w}^L\}$

```

1  $\mathbf{x}^1 = \mathbf{s}^{\text{in}}$ ; // Clamp input neurons to input pattern
2 for  $l = 1; l < L + 1; l = l + 1$  do // Forward pass of the network
3 |  $\mathbf{x}^{l+1} = \mathbf{w}^l f(\mathbf{x}^l)$ ;
4 end
5  $\tilde{\mathbf{x}}^{L+1} = \mathbf{s}^{\text{target}}$ ;
6  $\boldsymbol{\varepsilon}^{L+1} = \tilde{\mathbf{x}}^{L+1} - \mathbf{x}^{L+1}$ ;
7 for  $l = L + 1; l > 2; l = l - 1$  do // Target-propagation
8 |  $\tilde{\mathbf{x}}^{l-1} = f^{-1}\left(\left(\mathbf{w}^{l-1}\right)^{-1} \tilde{\mathbf{x}}^l\right)$ ;
9 |  $\boldsymbol{\varepsilon}^{l-1} = \tilde{\mathbf{x}}^{l-1} - \mathbf{x}^{l-1}$ ;
10 end
11 for  $l = 1; l < L + 1; l = l + 1$  do // Update weights
12 |  $\Delta \mathbf{w}^l = \alpha \boldsymbol{\varepsilon}^{l+1} \left(f(\mathbf{x}^l)\right)^T$ ;
13 |  $\mathbf{w}^l = \mathbf{w}^l + \Delta \mathbf{w}^l$ ;
14 end

```

---

1569

1570 We first briefly review target propagation. The key insight behind target propagation is that rather  
1571 than updating weights based on a gradient of a loss function, one can instead attempt to explicitly  
1572 compute what are the optimal activity for the neurons so that they can produce the desired target pattern,  
1573 and then update the weights so as to nudge the current neural activity towards the optimal activity  
1574 directly. We call these optimal activity *local target* since if the neurons takes this activity, the network  
1575 would produce the desired target pattern. Importantly, we can directly compute the local target in terms  
1576 of the *inverses* of the weights and activation functions. Namely, suppose that we have a three-layer  
1577 network with activation functions  $f(\cdot)$ , weight matrices  $\mathbf{w}^1, \mathbf{w}^2, \mathbf{w}^3$  and an input pattern  $\mathbf{s}^{\text{in}}$ . The output  
1578 of this network is  $\mathbf{x}^4 = \mathbf{w}^3 f(\mathbf{w}^2 f(\mathbf{w}^1 f(\mathbf{s}^{\text{in}})))$ . Suppose instead that we do not want the network to  
1579 output  $\mathbf{x}^4$  for a given  $\mathbf{s}^{\text{in}}$  but rather a given target pattern  $\mathbf{s}^{\text{target}}$ . Then, the activity at the first layer  
1580  $\tilde{\mathbf{x}}^1$  that would produce this desired activity can be exactly computed by inverting<sup>1</sup> the network  $\tilde{\mathbf{x}}^1 =$   
1581  $f^{-1}\left(\left(\mathbf{w}^1\right)^{-1} f^{-1}\left(\left(\mathbf{w}^2\right)^{-1} f^{-1}\left(\left(\mathbf{w}^3\right)^{-1} \mathbf{s}^{\text{target}}\right)\right)\right)$ . From this, we can define a recursion of one local  
1582 target in terms of another at the layer above,

$$\begin{aligned} \tilde{\mathbf{x}}^l &= f^{-1}\left(\left(\mathbf{w}^l\right)^{-1} \tilde{\mathbf{x}}^{l+1}\right) \\ \tilde{\mathbf{x}}^{L+1} &= \mathbf{s}^{\text{target}} \end{aligned} \tag{17}$$

1583 Based on these targets we can define the errors in target propagation as  $\boldsymbol{\varepsilon}^l = \tilde{\mathbf{x}}^l - \mathbf{x}^l$ . These errors drive the  
1584 update of weights according to:

$$\mathbf{w}^{l,l} = \mathbf{w}^l + \alpha \boldsymbol{\varepsilon}^{l+1} \left(\mathbf{x}^l\right)^T \tag{18}$$

---

<sup>1</sup>Note that in realistic networks the weight matrices are not all square so an exact inverse  $(\mathbf{w}^l)^{-1}$  does not exist. Instead, we can compute approximations of the inverse using the Moore-Penrose pseudoinverse<sup>133</sup>  $(\mathbf{w}^l)^\dagger$ , which is the least squares solution to the optimization problem  $\arg \min_{\mathbf{w}} \|\mathbf{I} - \mathbf{w}^l \mathbf{w}\|$ .

1585 This algorithm is summarized in Algorithm 8.

### 1586 2.2.2 Analyses of the relationships

1587 Now we formally prove the below observations in Extended Data Figs. 3 about how prospective configura-  
 1588 tion, particularly, *predictive coding network*<sup>25,40,52</sup> (PCN), has close a relationship to target propagation<sup>122</sup>.  
 1589 In other words, we formally prove that

- 1590 • In an output-constrained PCN, neural activity after relaxation converges to the local target;
- 1591 • In an input-output-constrained PCN, neural activity after relaxation approaches to the weighted sum  
 1592 of the predicting activity and the local target.

1593 In the above, predicting activity refer to the neural activity when the model is making prediction, and they  
 1594 are the same for both backpropagation and PCN as they compute the same neural activity when making a  
 1595 prediction.

1596 **Output-constrained PCN** As mentioned, we first investigate the “output-constrained PCN”: in this PCN  
 1597 input neurons are not clamped to the input pattern but output neurons are clamped to the target pattern.  
 1598 We show that in this PCN, the activity after relaxation is precisely equal to the local target. Since  $\mathbf{x}^1$  is not  
 1599 constrained to the input pattern, we can look at its dynamic by setting  $l = 1$  in Eq. (12). Since there is no  
 1600 error term or error nodes at the input layer, there is only the later term left when setting  $l = 1$  in Eq. (12)  
 1601 (note that here we write in matrix & vector form):

$$\Delta \mathbf{x}^1 = \gamma f'(\mathbf{x}^1) \circ \left( (\mathbf{w}^1)^T \boldsymbol{\varepsilon}^2 \right) \quad (19)$$

$$= \gamma f'(\mathbf{x}^1) \circ \left( (\mathbf{w}^1)^T (\mathbf{x}^2 - \mathbf{w}^1 f(\mathbf{x}^1)) \right) \quad (20)$$

1602 Considering the above dynamic has converged, we can set  $\Delta \mathbf{x}^1 = \mathbf{0}$  in the above equation and solving for  
 1603  $\mathbf{x}^1$ , then we can obtain the converged value of  $\mathbf{x}^1$ :

$$\mathbf{x}^1 = f^{-1} \left( (\mathbf{w}^1)^{-1} \mathbf{x}^2 \right) \quad (21)$$

1604 Now we look at the dynamic of  $\mathbf{x}^2$  by setting  $l = 2$  in Eq. (12):

$$\Delta \mathbf{x}^2 = \gamma \left( -\boldsymbol{\varepsilon}^2 + f'(\mathbf{x}^2) \circ \left( (\mathbf{w}^2)^T \boldsymbol{\varepsilon}^3 \right) \right) \quad (22)$$

$$= \gamma \left( -(\mathbf{x}^2 - \mathbf{w}^1 f(\mathbf{x}^1)) + f'(\mathbf{x}^2) \circ \left( (\mathbf{w}^2)^T (\mathbf{x}^3 - \mathbf{w}^2 f(\mathbf{x}^2)) \right) \right) \quad (23)$$

1605 Putting the solved  $\mathbf{x}^1$ , i.e., Eq. (21), into the above Eq., we have:

$$\Delta \mathbf{x}^2 = \gamma f'(\mathbf{x}^2) \circ \left( (\mathbf{w}^2)^T (\mathbf{x}^3 - \mathbf{w}^2 f(\mathbf{x}^2)) \right) \quad (24)$$

1606 Considering the above dynamic has converged, we can set  $\Delta \mathbf{x}^2 = \mathbf{0}$  in the above equation and solving for  
 1607  $\mathbf{x}^2$ , then we can obtain the converged value of  $\mathbf{x}^2$ :

$$\mathbf{x}^2 = f^{-1} \left( (\mathbf{w}^2)^{-1} \mathbf{x}^3 \right) \quad (25)$$

1608 One can now see the proof goes recursively until  $l = L$  and  $\mathbf{x}^{L+1}$  is fixed to the target pattern  $\mathbf{s}^{\text{target}}$ :

$$\begin{aligned} \mathbf{x}^l &= f^{-1} \left( \left( \mathbf{w}^l \right)^{-1} \mathbf{x}^{l+1} \right) \\ \mathbf{x}^{L+1} &= \mathbf{s}^{\text{target}} \end{aligned} \quad (26)$$

1609 which is exactly the recursive formula of the local target in target propagation, i.e., Eq. (17). Thus, neural  
1610 activity of output-constrained PCN after relaxation equals to the local target.

1611 **Input-output-constrained PCN** Secondly, we investigate the “input-output-constrained PCN”: in this PCN  
1612 both input and output neurons are clamped to the input and target patterns, respectively. We show that  
1613 in this PCN, the activity after relaxation are the weighted sum of the predicting activity and the local  
1614 target. Particularly, since in a input-output-constrained PCN, we can only solve for the equilibrium after  
1615 relaxation analytically in the linear case, we prove this for a linear PCN. Nevertheless, the analysis still  
1616 provides useful insights. Looking at the network dynamics at a given layer  $l$ , i.e., Eq. (12), we can write  
1617 the dynamics in the linear case as,

$$\Delta \mathbf{x}^l = \gamma \left( - \left( \mathbf{x}^l - \mathbf{w}^{l-1} \mathbf{x}^{l-1} \right) + \left( \mathbf{w}^l \right)^T \left( \mathbf{x}^{l+1} - \mathbf{w}^l \mathbf{x}^l \right) \right) \quad (27)$$

1618 If we then set  $\Delta \mathbf{x}^l = \mathbf{0}$  and solve for  $\mathbf{x}^l$ , we obtain,

$$\Delta \mathbf{x}^l = \mathbf{0} \implies - \left( \mathbf{x}^l - \mathbf{w}^{l-1} \mathbf{x}^{l-1} \right) + \left( \mathbf{w}^l \right)^T \left( \mathbf{x}^{l+1} - \mathbf{w}^l \mathbf{x}^l \right) = \mathbf{0} \quad (28)$$

$$\implies -\mathbf{x}^l + \mathbf{w}^{l-1} \mathbf{x}^{l-1} + \left( \mathbf{w}^l \right)^T \mathbf{x}^{l+1} - \left( \mathbf{w}^l \right)^T \mathbf{w}^l \mathbf{x}^l = \mathbf{0} \quad (29)$$

$$\implies \mathbf{x}^l + \left( \mathbf{w}^l \right)^T \mathbf{w}^l \mathbf{x}^l = \mathbf{w}^{l-1} \mathbf{x}^{l-1} + \left( \mathbf{w}^l \right)^T \mathbf{x}^{l+1} \quad (30)$$

$$\implies \left( \mathbf{I} + \left( \mathbf{w}^l \right)^T \mathbf{w}^l \right) \mathbf{x}^l = \mathbf{w}^{l-1} \mathbf{x}^{l-1} + \left( \mathbf{w}^l \right)^T \mathbf{x}^{l+1} \quad (31)$$

$$\implies \mathbf{x}^l = \left( \mathbf{I} + \left( \mathbf{w}^l \right)^T \mathbf{w}^l \right)^{-1} \left( \mathbf{w}^{l-1} \mathbf{x}^{l-1} + \left( \mathbf{w}^l \right)^T \mathbf{x}^{l+1} \right) \quad (32)$$

1619 If we assume that the norm of the weights is large compared to the identity matrix  $\mathbf{I}$ , i.e., we consider  
1620  $\left( \mathbf{I} + \left( \mathbf{w}^l \right)^T \mathbf{w}^l \right)^{-1} \approx \left( \left( \mathbf{w}^l \right)^T \mathbf{w}^l \right)^{-1}$ , the above equilibrium solution can further be approximated by:

$$\implies \mathbf{x}^l \approx \left( \left( \mathbf{w}^l \right)^T \mathbf{w}^l \right)^{-1} \left( \mathbf{w}^{l-1} \mathbf{x}^{l-1} + \left( \mathbf{w}^l \right)^T \mathbf{x}^{l+1} \right) \quad (33)$$

$$\implies \mathbf{x}^l \approx \underbrace{\left( \left( \mathbf{w}^l \right)^T \mathbf{w}^l \right)^{-1}}_{\text{constant}} \underbrace{\mathbf{w}^{l-1} \mathbf{x}^{l-1}}_{\substack{\text{predicting activity} \\ \text{for backpropagation and PCN}}} + \underbrace{\left( \mathbf{w}^l \right)^{-1} \mathbf{x}^{l+1}}_{\substack{\text{local target} \\ \text{from target propagation}}} \quad (34)$$

1621 where the equilibrium solution is simply the weighted sum of the predicting activity and the local target.

1622 In summary, during relaxation the activity in predictive coding networks tends to move from the pre-  
1623 dicting activity towards the local target that would be computed by target propagation. These relationships  
1624 on one hand build interesting connections to existing work, on the other hand serve as a step in providing  
1625 a mathematical explanation of the target alignment of predictive coding networks, as discussed in the later  
1626 Section 2.4.4.

## 1627 2.3 Prospective index of predictive coding networks (Extended Data Figs. 5)

1628 This section formally proves two properties of the prospective index  $\phi^l$  of a *predictive coding net-*  
 1629 *work*<sup>25,40,52</sup> (PCN), that can be observed in Extended Data Figs. 5d. To briefly recap, prospective index  
 1630  $\phi^l$  quantifies to what extent the hidden neural activity of the network following clamping output neurons  
 1631 to a target pattern is shifting toward the hidden neural activity following subsequent weight modification.  
 1632 Below we show two properties visible in Extended Data Figs. 5d:

- 1633 • Firstly, prospective index of the first hidden layer ( $\phi^2$ ) in a PCN is always one.
- 1634 • Secondly, the prospective index in other layer is close to one because, the weights  $\mathbf{W}$  in PCN are  
 1635 updated towards a configuration  $\mathbf{W}^*$  whose prospective index is one.

1636 Note that these observations of high prospective index of predictive coding networks on one hand  
 1637 formally defines what we proposed as “prospective configuration” and distinguishes itself from backpropa-  
 1638 gation, on the other hand serve as a step in providing a mathematical explanation of the target alignment  
 1639 of predictive coding networks, as discussed in the later Section 2.4.4.

### 1640 2.3.1 Prospective index of the first hidden layer of PCN is always one

1641 We assume that the model does not make a perfect prediction with the current weights, so that the error  
 1642 in the prediction drives the learning. As defined in Extended Data Figs. 5a, vectors  $\mathbf{v}^{\oplus,l}$  and  $\mathbf{v}^{\prime,l}$  describe  
 1643 the changes in hidden neuron activity, due to target pattern being provided and learning respectively.  
 1644 Specifically for layer  $l = 2$ , these vectors are:

$$1645 \mathbf{v}^{\oplus,2} = \mathbf{x}_{\mathbf{W}}^{\oplus,2} - \mathbf{x}_{\mathbf{W}}^{\ominus,2} \quad (35)$$

$$1645 \mathbf{v}^{\prime,2} = \mathbf{x}_{\mathbf{W}'}^{\ominus,2} - \mathbf{x}_{\mathbf{W}}^{\ominus,2} \quad (36)$$

1646 We will now show that for PCN the above vectors  $\mathbf{v}^{\oplus,2}$  and  $\mathbf{v}^{\prime,2}$  point in the same direction. The change in  
 1647 activity due to learning  $\mathbf{v}^{\prime,2}$  is equal to

$$1647 \mathbf{v}^{\prime,2} = \mathbf{w}^{\prime,1} f(\mathbf{x}_{\mathbf{W}'}^{\ominus,1}) - \mathbf{w}^1 f(\mathbf{x}_{\mathbf{W}}^{\ominus,1}) \quad (37)$$

1648 Since the value nodes of the first (input) layer  $\mathbf{x}^1$  are always fixed to the input signal  $\mathbf{s}^{\text{in}}$ , the above Eq. (37)  
 1649 can further be written as,

$$\begin{aligned} 1649 \mathbf{v}^{\prime,2} &= \mathbf{w}^{\prime,1} f(\mathbf{s}^{\text{in}}) - \mathbf{w}^1 f(\mathbf{s}^{\text{in}}) \\ &= (\mathbf{w}^{\prime,1} - \mathbf{w}^1) f(\mathbf{s}^{\text{in}}) \\ &= \Delta \mathbf{w}^1 f(\mathbf{s}^{\text{in}}) \end{aligned} \quad (38)$$

1650 Using Eqs. (13) and (11), we write

$$1650 \mathbf{v}^{\prime,2} = \alpha (\mathbf{x}_{\mathbf{W}}^{\oplus,2} - \hat{\mathbf{x}}_{\mathbf{W}}^{\oplus,2}) \left( f(\mathbf{s}^{\text{in}}) \right)^T f(\mathbf{s}^{\text{in}}) \quad (39)$$

1651 In Eq. (39),  $\hat{\mathbf{x}}^l$  denotes inputs to neurons in layer  $l$ , i.e.,  $\hat{\mathbf{x}}^l = \mathbf{w}^{l-1} f(\mathbf{x}^{l-1})$ . Note that  $\hat{\mathbf{x}}_{\mathbf{W}}^{\oplus,2} = \mathbf{x}_{\mathbf{W}}^{\ominus,2}$ , because  
 1652 both of these quantities are equal to  $\mathbf{w}^1 f(\mathbf{s}^{\text{in}})$  (the input of the first hidden layer ( $l = 2$ ) does not change

1653 in response to output neuron being clamped). Using  $\hat{\mathbf{x}}_{\mathbf{W}}^{\oplus,2} = \mathbf{x}_{\mathbf{W}}^{\ominus,2}$ , the above Eq. (39) can further be written  
 1654 as,

$$\mathbf{v}'^2 = \left( \mathbf{x}_{\mathbf{W}}^{\oplus,2} - \mathbf{x}_{\mathbf{W}}^{\ominus,2} \right) \alpha \left( f \left( \mathbf{s}^{\text{in}} \right) \right)^T f \left( \mathbf{s}^{\text{in}} \right) \quad (40)$$

1655 Note that  $\alpha \left( f \left( \mathbf{s}^{\text{in}} \right) \right)^T f \left( \mathbf{s}^{\text{in}} \right)$  is a positive scalar (if at least one entry in the input pattern is non-zero).  
 1656 Comparing Eqs. (35) and (40), we can see that vectors  $\mathbf{v}'^2$  and  $\mathbf{v}^{\oplus,2}$  are just scaled versions of each other,  
 1657 hence the cos of the angle between them is equal to 1, and thus prospective index is also equal to 1 (in the  
 1658 limit of  $\kappa \rightarrow 0$ ).

### 1659 2.3.2 Weights in PCN are updated towards a configuration with prospective index of one

1660 As seen in Extended Data Fig. 5d, the prospective index for layers  $l > 2$  is very close to one. To provide  
 1661 an intuition for why this is the case, in this section we demonstrate how PCNs would need to be modified  
 1662 to have prospective index equal to 1. We will refer to such modified model as target-PCN, and calculate its  
 1663 prospective index.

1664 As in the previous section, we assume that the model does not make a perfect prediction with the current  
 1665 weights, so that the error in the prediction drives the learning. We start with recapping what happens in  
 1666 sequence in one iteration of the standard PCN.

- 1667 1. Start from relaxation with only input neurons clamped to input pattern ( $\ominus$ ) and with current weight  
 1668  $\mathbf{W}$ , the hidden neuron activity settles to:  $\mathbf{x}_{\mathbf{W}}^{\ominus,l}$
- 1669 2. Both input and output neurons are clamped to the input and target pattern respectively ( $\oplus$ ) and then  
 1670 the hidden neuron activity is relaxed to:  $\mathbf{x}_{\mathbf{W}}^{\oplus,l}$
- 1671 3. Weights  $\mathbf{W}$  are updated for one step to  $\mathbf{W}'$  to decrease the energy, while hidden neuron activity stays  
 1672 still from the last step:  $\mathbf{x}_{\mathbf{W}}^{\oplus,l}$
- 1673 4. Output neurons are freed but the input neuron is still clamped to the input pattern and then the  
 1674 hidden neuron activity is relaxed to:  $\mathbf{x}_{\mathbf{W}'}^{\ominus,l}$

1675 In the above step 3, weights are updated for one step from  $\mathbf{W}$  to  $\mathbf{W}'$ . However, one can investigate the  
 1676 case of updating weights  $\mathbf{W}$  for many steps until convergence  $\mathbf{W}^*$  in the above step 3. This will result in  
 1677 weights  $\mathbf{W}^*$  that represents: “the target towards which the weights  $\mathbf{W}$  are updated”. Thus, we call this  
 1678 variant “target-PCN” and it is summarized in Algorithm 9. Specifically, the procedure of target-PCN is to  
 1679 replace the above steps 3 and 4 of standard PCN with:

- 1680 3. Weights are updated for many steps from  $\mathbf{W}$  to  $\mathbf{W}^*$  to decrease the energy till convergence, while  
 1681 hidden neuron activity stays still from the last step:  $\mathbf{x}_{\mathbf{W}}^{\oplus,l}$ ;
- 1682 4. Output neurons are freed but the input neuron is still clamped to the input pattern and then the  
 1683 hidden neuron activity is relaxed to:  $\mathbf{x}_{\mathbf{W}^*}^{\ominus,l}$ ;

---

**Algorithm 9:** Learn with target-PCN

---

**Input:** input pattern  $\mathbf{s}^{\text{in}}$ ; target pattern  $\mathbf{s}^{\text{target}}$ ; synaptic weights  $\{\mathbf{w}^1, \mathbf{w}^2, \dots, \mathbf{w}^L\}$   
**Output:** updated synaptic weights  $\{\mathbf{w}^1, \mathbf{w}^2, \dots, \mathbf{w}^L\}$

```

1  $\mathbf{x}^1 = \mathbf{s}^{\text{in}}$ ; // Clamp input neurons to input pattern
2  $\mathbf{x}^{L+1} = \mathbf{s}^{\text{target}}$ ; // Clamp output neurons to target pattern
3 for  $t = 0; t < \mathcal{T}; t = t + 1$  do // Relaxation
4   for  $l = 1; l < L + 1; l = l + 1$  do
5      $\hat{\mathbf{x}}^{l+1} = \mathbf{w}^l f(\mathbf{x}^l)$ ;
6      $\boldsymbol{\varepsilon}^{l+1} = \mathbf{x}^{l+1} - \hat{\mathbf{x}}^{l+1}$ ;
7   end
8   for  $l = 2; l < L + 1; l = l + 1$  do
9      $\Delta \mathbf{x}^l = \gamma \left( -\boldsymbol{\varepsilon}^l + f'(\mathbf{x}^l) \circ \left( (\mathbf{w}^l)^T \boldsymbol{\varepsilon}^{l+1} \right) \right)$ ;
10     $\mathbf{x}^l = \mathbf{x}^l + \Delta \mathbf{x}^l$ ;
11  end
12 end
13 while  $\{\mathbf{w}^1, \mathbf{w}^2, \dots, \mathbf{w}^L\}$  not converged do // Update weights till convergence
14   for  $l = 1; l < L + 1; l = l + 1$  do
15      $\hat{\mathbf{x}}^{l+1} = \mathbf{w}^l f(\mathbf{x}^l)$ ;
16      $\boldsymbol{\varepsilon}^{l+1} = \mathbf{x}^{l+1} - \hat{\mathbf{x}}^{l+1}$ ;
17   end
18   for  $l = 1; l < L + 1; l = l + 1$  do // Update weights
19      $\Delta \mathbf{w}^l = \alpha \boldsymbol{\varepsilon}^{l+1} (f(\mathbf{x}^l))^T$ ;
20      $\mathbf{w}^l = \mathbf{w}^l + \Delta \mathbf{w}^l$ ;
21   end
22 end

```

---

1684

1685 In the following, we demonstrate prospective index of target-PCN is one for all layers. First, we should  
1686 notice that the minimum of energy  $E$  of PCN is zero, since the energy function is a sum of quadratic terms,  
1687 i.e., Eq. (6). Then, we should notice that such energy  $E$  of PCN can be optimized to its minimum of zero  
1688 by optimizing only  $\mathbf{W}$ . Particularly, the local energy term of layer  $l$  is:

$$\begin{aligned} \frac{1}{2} (\boldsymbol{\varepsilon}^l)^T \boldsymbol{\varepsilon}^l &= \frac{1}{2} (\mathbf{x}^l - \hat{\mathbf{x}}^l)^T (\mathbf{x}^l - \hat{\mathbf{x}}^l) \\ &= \frac{1}{2} (\mathbf{x}^l - \mathbf{w}^{l-1} f(\mathbf{x}^{l-1}))^T (\mathbf{x}^l - \mathbf{w}^{l-1} f(\mathbf{x}^{l-1})) \end{aligned} \quad (41)$$

1689 In the above Eq.,  $\mathbf{x}^l - \mathbf{w}^{l-1} f(\mathbf{x}^{l-1})$  can be optimized to produce a zero vector by optimizing only  $\mathbf{w}^{l-1}$ ,  
1690 as long as  $f(\mathbf{x}^{l-1})$  is not a zero vector. Specifically, let us denote all the non-zero entries in  $f(\mathbf{x}^{l-1})$  by  
1691  $\{f(x_i^{l-1})\}_{i \in I}$ , where  $I$  is the set of indices  $i$  so that  $f(x_i^{l-1})$  is non-zero. Since  $f(\mathbf{x}^{l-1})$  is not a zero  
1692 vector,  $I \neq \emptyset$ . To demonstrate that there exists a solution for  $\{w_{j,i}^{l-1}\}_{i \in I}$  so that  $x_j^l = \sum_{i \in I} w_{j,i}^{l-1} f(x_i^{l-1})$ ,  
1693 we construct an example of such solution. Such sample solution is to pick one index  $g$  from  $I$ , then have  
1694  $w_{j,g}^{l-1} = \frac{x_j^l}{f(x_i^{l-1})}$  and  $\{w_{j,i}^{l-1} = 0 : i \in I, i \notin \{g\}\}$ . Thus, as long as  $f(\mathbf{x}^{l-1})$  is not a zero vector ( $I \neq \emptyset$ ), there  
1695 exists a solution of  $\mathbf{w}^{l-1}$  that makes  $\mathbf{x}^l - \mathbf{w}^{l-1} f(\mathbf{x}^{l-1})$  a zero vector.



1696 Thus, in step 3 of the target-PCN, the energy of the network is at its minimum of zero. This further  
 1697 implies that in the step 4 of the target-PCN, the neural activity does not move, i.e.,

$$\mathbf{x}_{\mathbf{w}^*}^{\ominus,l} = \mathbf{x}_{\mathbf{w}}^{\oplus,l} \quad (42)$$

1698 According to the definition of prospective index in Extended Data Figs. 5a-b, the prospective index of this  
 1699 target-PCN ( $\phi^{*,l}$ ) is:

$$\begin{aligned} \phi^{*,l} &= \frac{\mathbf{v}^{\oplus,l} \cdot \mathbf{v}^{*,l}}{(\|\mathbf{v}^{\oplus,l}\| + \kappa)(\|\mathbf{v}^{*,l}\| + \kappa)} \\ &\approx \cos(\mathbf{v}^{\oplus,l}, \mathbf{v}^{*,l}) \\ &= \cos\left(\overrightarrow{\mathbf{x}_{\mathbf{w}}^{\ominus,l} \mathbf{x}_{\mathbf{w}}^{\oplus,l}}, \overrightarrow{\mathbf{x}_{\mathbf{w}}^{\ominus,l} \mathbf{x}_{\mathbf{w}^*}^{\oplus,l}}\right) \\ &= \cos\left(\overrightarrow{\mathbf{x}_{\mathbf{w}}^{\ominus,l} \mathbf{x}_{\mathbf{w}}^{\oplus,l}}, \overrightarrow{\mathbf{x}_{\mathbf{w}}^{\ominus,l} \mathbf{x}_{\mathbf{w}}^{\oplus,l}}\right) \text{ according to Eq. (42)} \\ &= 1 \end{aligned} \quad (43)$$

1700 This theoretical result is further confirmed by empirical observation in Extended Data Figs. 5d. Since  
 1701 the standard PCN modifies the weights in a similar direction as target-PCN, it is likely to have a similar  
 1702 prospective index.

1703 In summary, predictive coding networks has a high prospective index. This on one hand formally  
 1704 defines what we proposed as “prospective configuration” and distinguishes itself from backpropagation, on  
 1705 the other hand serve as a step in providing a mathematical explanation of the target alignment of predictive  
 1706 coding networks, as discussed in the later Section 2.4.4.

## 1707 2.4 Target alignment

1708 In this section we provide a mathematical analysis of target alignment. First, we show that the target  
 1709 alignment is equal to 1 for various networks that do not include hidden layers. Next we demonstrate that  
 1710 target propagation produces target alignment of 1. The third subsections identifies a special condition  
 1711 under which backpropagation produces target alignment of 1. The last subsection addresses the question of  
 1712 why predictive coding networks have higher target alignment than backpropagation, using several findings  
 1713 in earlier sections.

### 1714 2.4.1 Target alignment for networks without hidden layers (Fig. 3e)

1715 Fig. 3e shows that target alignment for models without hidden layers, trained either with PC or BP, is  
 1716 exactly one, and here we prove this property analytically. Without hidden layers, PC and BP are identical  
 1717 algorithms. In a linear network, the change of the weight  $\mathbf{w}^1$  is:

$$\Delta \mathbf{w}^1 = \alpha \boldsymbol{\varepsilon}^2 (\mathbf{x}^1)^T \quad (44)$$

1718 We denote output after learning by  $\mathbf{x}'^2$ . The change of the output  $\mathbf{x}'^2 - \mathbf{x}^2$  is:

$$\mathbf{x}'^2 - \mathbf{x}^2 = \mathbf{w}'^2 \mathbf{x}^1 - \mathbf{w}^2 \mathbf{x}^1 \quad (45)$$

$$= \Delta \mathbf{w}^1 \mathbf{x}^1 \quad (46)$$

$$= \alpha \boldsymbol{\varepsilon}^2 (\mathbf{x}^1)^T \mathbf{x}^1 \quad (47)$$

1719 Here  $(\mathbf{x}^1)^T \mathbf{x}^1$  is a positive scalar (if at least one entry in  $\mathbf{x}^1$  is non-zero). Thus,

$$\mathbf{x}'^2 - \mathbf{x}^2 \sim \boldsymbol{\varepsilon}^2 \quad (48)$$

1720 According to the definition of target alignment, which is the cosine similarity of the direction of the target  
1721 (i.e.,  $\boldsymbol{\varepsilon}^2$ ) and the direction of learning (i.e.,  $\mathbf{x}'^2 - \mathbf{x}^2$ ), target alignment of this network is exactly one. This  
1722 conclusion also applies to network with nonlinear activation function.

#### 1723 2.4.2 Target alignment of target propagation (Extended Data Figs. 4a)

1724 This subsection demonstrates that target alignment of target propagation is equal to 1. Such target  
1725 alignment equal to 1 for target propagation is implied by Theorem 5 in the study of Meulemans et al.<sup>58</sup>.  
1726 They show that if a network is linear and weights in each layer are invertible, then “parameter updates  
1727 push the output activation along the negative gradient direction in the output space”<sup>58</sup>. Simulations in  
1728 Extended Data Fig. 4a illustrate that the target alignment of target propagation is indeed equal to 1. For  
1729 completeness we include in this paper a simple direct proof of this result (which we will also use in the  
1730 next section).

1731 For linear networks with invertible weights, the relationship between errors in adjacent layers in target  
1732 propagation is:

$$\boldsymbol{\varepsilon}^l = (\mathbf{w}^l)^{-1} \boldsymbol{\varepsilon}^{l+1} \quad (49)$$

1733 The activity of output neurons after the weight modification is:

$$\mathbf{x}'^{L+1} = (\mathbf{w}^L + \alpha \boldsymbol{\varepsilon}^{L+1} (\mathbf{x}^L)^T) \mathbf{w}'^{L-1} \dots \mathbf{w}'^1 \mathbf{x}^1 \quad (50)$$

$$= \mathbf{w}^L \mathbf{w}'^{L-1} \dots \mathbf{w}'^1 \mathbf{x}^1 + \boldsymbol{\varepsilon}^{L+1} \alpha (\mathbf{x}^L)^T \mathbf{w}'^{L-1} \dots \mathbf{w}'^1 \mathbf{x}^1 \quad (51)$$

1734 Term  $\alpha (\mathbf{x}^L)^T \mathbf{w}'^{L-1} \dots \mathbf{w}'^1 \mathbf{x}^1$  is a scalar, so let us denote it by  $c_L$ . Expanding  $\mathbf{w}'^{L-1}$  and using Eq. (49),  
1735 we obtain:

$$\mathbf{x}'^{L+1} = \mathbf{w}^L (\mathbf{w}^{L-1} + \alpha \boldsymbol{\varepsilon}^L (\mathbf{x}^{L-1})^T) \dots \mathbf{w}'^1 \mathbf{x}^1 + c_L \boldsymbol{\varepsilon}^{L+1} \quad (52)$$

$$= \mathbf{w}^L \mathbf{w}^{L-1} \dots \mathbf{w}'^1 \mathbf{x}^1 + \mathbf{w}^L (\mathbf{w}^L)^{-1} \boldsymbol{\varepsilon}^{L+1} \alpha (\mathbf{x}^{L-1})^T \dots \mathbf{w}'^1 \mathbf{x}^1 + c_L \boldsymbol{\varepsilon}^{L+1} \quad (53)$$

1736 Note that  $\mathbf{w}^L (\mathbf{w}^L)^{-1}$  is equal to the identity, so can be removed from the above equation, and  $\alpha (\mathbf{x}^{L-1})^T \dots \mathbf{w}'^1 \mathbf{x}^1$   
1737 is a scalar, so denote it by  $c_{L-1}$ . Expanding all terms  $\mathbf{w}'^l$  analogously as above, we eventually obtain:

$$\mathbf{x}'^{L+1} = \mathbf{w}^L \dots \mathbf{w}^1 \mathbf{x}^1 + (c_L + \dots + c_1) \boldsymbol{\varepsilon}^{L+1} \quad (54)$$

1738 Since the output before weight update was  $\mathbf{w}^L \dots \mathbf{w}^1 \mathbf{x}^1$ , the change in the output is proportional to the  
1739 direction towards target  $\boldsymbol{\varepsilon}^{L+1}$ , hence the target alignment is equal to 1. Given the similarity between target  
1740 propagation and predictive coding networks described in subsections 2.4.4 and 2.2, the predictive coding  
1741 networks should also have target alignment relatively close to 1.

1742 Since target propagation has a desirable property of perfect target alignment, one may ask if the brain  
1743 can employ target propagation rather than prospective configuration as is main learning principle. However,  
1744 energy-based networks have several advantages over target propagation both in terms of computational  
1745 properties and relationship with experimental data. Since target propagation requires computation of  
1746 multiple matrix inverses, it is numerically unstable, so for example in Extended Data Fig. 4a we only

1747 show the result for networks with up to 5 layers, because we were unable to perform target propagation  
1748 in deeper networks due to numerical instabilities. Predictive coding networks offer a nice alternative  
1749 which approximates target propagation, but is numerically stable. Furthermore, target propagation does  
1750 not modify the activity of the neurons during relaxation, so it does not follow prospective configuration.  
1751 Consequently, in the case of the network in Fig. 1 target propagation would not compensate the weight to  
1752 olfactory output, because such compensation relies on updating the activity of the hidden neuron. Theory  
1753 reviewed in this section implies that target propagation only produces target alignment equal to 1 if the  
1754 weights are invertable, but this is not the case in the network in Fig. 1, so target propagation would not  
1755 produce unity target alignment for this problem. Moreover, target propagation would not be able to  
1756 reproduce the patterns of behaviour and neural activity in Figs. 5, 6 and 7, because reproducing these data  
1757 relies on modifying activity of hidden neurons after feedback, and target propagation does not do it.

### 1758 **2.4.3 Target alignment for orthogonal initialization (Extended Data Figs. 4c)**

1759 This subsection identifies one special conditions under which backpropagation produces target alignment  
1760 of 1. Specifically, simulations in Extended Data Fig. 4c show that target alignment is equal to 1 for  
1761 backpropagation in linear networks, when the weights are initialized to orthogonal values  $(\mathbf{w}^l)^T = \mathbf{w}^l$ .  
1762 This observation can be explained using results from the previous section: when weights are orthogonal,  
1763 then  $(\mathbf{w}^l)^T = (\mathbf{w}^l)^{-1}$ , hence the relationship between errors in adjacent layers is the same as for target  
1764 propagation (Eq. (49)). Consequently, the same argument can be applied to backpropagation on linear  
1765 networks with orthogonal initialization to show that it has target alignment equal to 1.

### 1766 **2.4.4 Target alignment of predictive coding networks**

1767 The subsection addresses the question of why predictive coding networks have higher target alignment than  
1768 backpropagation, using several findings in earlier sections. Specifically, to justify why predictive coding  
1769 networks have high target alignment, we can combine 3 facts that we demonstrate in earlier sections, and  
1770 summarize here:

- 1771 1. Target alignment of target propagation is equal to 1. This is shown in Section 2.4.2.
- 1772 2. When target pattern is provided to output neurons in predictive coding networks, during relaxation  
1773 the neural activity in hidden layers converges to values related to local targets in target propagation.  
1774 This is shown in Section 2.2.
- 1775 3. Weight modification in predictive coding network reinforces the pattern of activity to which it  
1776 converged during relaxation. In other words, predicting activity changes as a result of weight  
1777 modification in the direction of the equilibrium reached during relaxation. This is shown in  
1778 Section 2.3.

1779 According to fact 3, learning in predictive coding networks reinforces the equilibrium activity, which,  
1780 according to fact 2, is largely dependent on the local targets. Therefore, the changes in activity in hidden  
1781 layers due to learning in predictive coding networks are similar to those in target propagation, and hence  
1782 the changes in the output activity are also likely to be similar, and the two algorithms should also share a  
1783 similarity in target alignment. According to fact 1, target propagation has target alignment of 1, so the  
1784 predictive coding should also share a similar target alignment.
